# Supplementary material for: Solving the discrepancy between the direct and relative-rate determinations of unimolecular reaction kinetics of dimethyl-substituted Criegee intermediate (CH3)2COO using a new photolytic precursor
Source: Royal Society of Chemistry journal article supplement (doi:10.1039/d1cp02270a), 2022-01-01
Supplement: d1cp02270a1.pdf [file d1cp02270a1.pdf]

## **Electronic Supplementary Material (ESI) for:**

### **Solving the discrepancy between the direct and relative-rate determinations of unimolecular reaction kinetics of dimethyl-substituted Criegee intermediate $(\text{CH}_3)_2\text{COO}$ using a new photolytic precursor**

Jari Peltola, Prasenjit Seal, Niko Vuorio, Petri Heinonen, and Arkke Eskola\*  
Department of Chemistry, University of Helsinki, P.O. Box 55 (A.I. Virtasen aukio 1), FI-00014,  
Helsinki, Finland

\*Corresponding author: [arkke.eskola@helsinki.fi](mailto:arkke.eskola@helsinki.fi)

## Table of Contents

|                                                                                                                                                                                                |     |
|------------------------------------------------------------------------------------------------------------------------------------------------------------------------------------------------|-----|
| <b>The determination of the effective optical path length, and the initial <math>(\text{CH}_3)_2\text{COO}</math> concentration</b> .....                                                      | 3   |
| <b>Synthesis of the 2-bromo-2-iodopropane precursor</b> .....                                                                                                                                  | 4   |
| <b>The heating and cooling methods of the flow tube reactor</b> .....                                                                                                                          | 4   |
| <b>Determination of <math>k_{\text{uni}}</math> from the absorption trace of <math>(\text{CH}_3)_2\text{COO}</math> and the diffusion loss of <math>(\text{CH}_3)_2\text{COO}</math></b> ..... | 5   |
| <b>UV spectra and absorption cross sections</b> .....                                                                                                                                          | 19  |
| <b>Comparison with the previous <math>k_{\text{uni}}</math> kinetic simulations and current branching ratios of the methyl-vinyl hydroperoxide and methyl-vinoxy + OH products</b> .....       | 26  |
| <b>References</b> .....                                                                                                                                                                        | 28  |
| <b>MESMER input files</b> .....                                                                                                                                                                | 29  |
| <b>ChemKin PLOG format</b> .....                                                                                                                                                               | 112 |

## The determination of the effective optical path length, and the initial $(\text{CH}_3)_2\text{COO}$ concentration

Figure S1 (vertical right-hand side axis) shows the average number of passes ( $NP$ ) of the 2 meters long confocal cavity as a function of wavelength. The number of passes were determined using a static  $(5.07 \pm 0.10)$  ppm  $\text{NO}_2$  in  $\text{N}_2$  -sample in reactor at 20 Torr and 296 K. The observed absorbance ( $A_{\text{NO}_2,\lambda}$ ) between wavelengths of 300 nm and 450 nm is

$$A_{\text{NO}_2,\lambda} = \ln(I_{0,\lambda}/I_\lambda) = \sigma_{\text{NO}_2,\lambda} \times [\text{NO}_2] \times NP_\lambda \times 2 \text{ m}, \quad (\text{S1})$$

where  $I_{0,\lambda}$  is the light intensity at wavelength  $\lambda$  in the absence of  $\text{NO}_2$ ,  $I_\lambda$  is the light intensity at wavelength  $\lambda$  in the presence of the static  $\text{NO}_2$  sample,  $\sigma_{\text{NO}_2,\lambda}$  is the  $\text{NO}_2$  absorption cross-section at wavelength  $\lambda$ ,  $[\text{NO}_2]$  is the  $\text{NO}_2$  concentration, and  $NP_\lambda$  is the number of beam passes at wavelength  $\lambda$ . The effective optical path length (OPL) (vertical left-hand side axis of Fig. S1) is calculated using an overlap length of  $75 \pm 0.5$  cm between the probe and the photolysis beams, which was marked and determined with two irises while the flow tube reactor was uninstalled. Using Equation S1, the effective OPL is

$$\text{OPL} = 0.75 \text{ m} \times NP_\lambda = 0.75 \text{ m} \times A_{\text{NO}_2,\lambda} / (\sigma_{\text{NO}_2,\lambda} \times [\text{NO}_2] \times 2 \text{ m}). \quad (\text{S2})$$

The average effective OPL at 338 nm (with the wavelength resolution of 4 nm) is about 75 m. The initial concentration of  $(\text{CH}_3)_2\text{COO}$  is calculated from the observed initial absorbance ( $A_{0,(\text{CH}_3)_2\text{COO}}$ ) at 338 nm as

$$[(\text{CH}_3)_2\text{COO}]_0 = A_{0,(\text{CH}_3)_2\text{COO}} / (\sigma_{(\text{CH}_3)_2\text{COO}} \times \text{OPL}). \quad (\text{S3})$$

The  $(\text{CH}_3)_2\text{COO}$  absorption cross-section ( $\sigma_{(\text{CH}_3)_2\text{COO}}$ ) at 338 nm at is about  $1.70 \times 10^{-17} \text{ cm}^2 \text{ molecule}^{-1}$ .

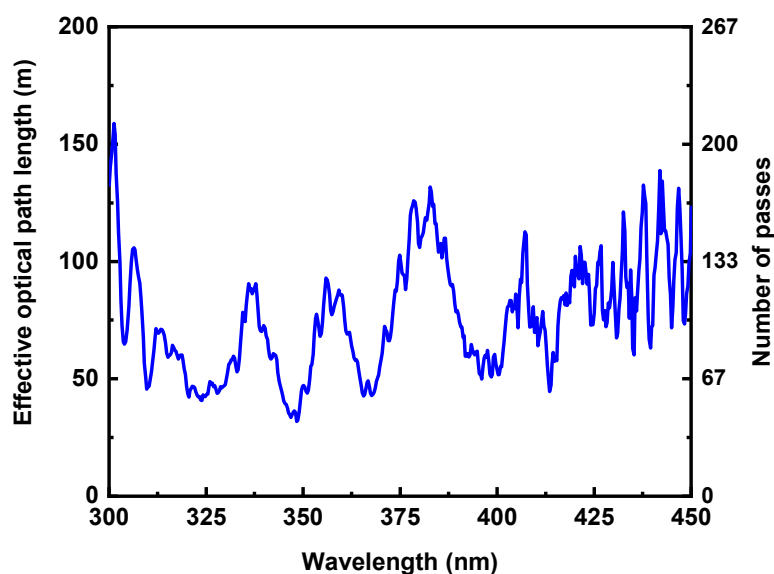

Figure S1. Determination of the effective optical path length of the TR-BB-CEAS cavity.

## Synthesis of the 2-bromo-2-iodopropane precursor

2-Bromopropene (48.9 g, 0.40 mol) was dissolved in trifluoroacetic acid (150 mL) and potassium iodide (60.4 g, 0.364 mol) was added. The reaction was monitored by  $^1\text{H}$  NMR and stopped after 8 h reaction time at 43% conversion. The reaction mixture was diluted with pentane, washed 5 times with water and dried over  $\text{MgSO}_4$ . The evaporation of the solvent and distillation at reduced pressure (53–55 °C / 35 mmHg) gave the title compound (19.7 g, 20%). Traces of iodine were removed by shaking the neat compound with solid  $\text{Na}_2\text{S}_2\text{O}_3$  followed by distillation in high vacuum. The distillate was collected into a receiver flask cooled in dry ice acetone bath.  $^1\text{H}$  NMR (400 MHz,  $\text{CDCl}_3$ )  $\delta$  2.76 (s, 6H).  $^{13}\text{C}$  NMR (100 MHz,  $\text{CDCl}_3$ )  $\delta$  47.46, 27.06. IR (ATR, liquid film)  $\nu_{\text{max}} / \text{cm}^{-1}$  1152.2, 1086.2s, 566.0s, 459.3. According to NMR analysis, the residual trifluoroacetic acid concentration in the product is  $<0.01$  wt%, resulting in  $[\text{CF}_3\text{COOH}]_{\text{max}} < 2 \times 10^{10}$  molecule  $\text{cm}^{-3}$  in the reactor at the highest  $[(\text{CH}_3)_2\text{ClBr}] = 6.3 \times 10^{13}$  molecule  $\text{cm}^{-3}$  used. Despite the very large bimolecular reaction rate coefficient,  $k((\text{CH}_3)_2\text{COO} + \text{CF}_3\text{COOH})(294\text{K}) = 6.1 \times 10^{-10} \text{ cm}^3 \text{ s}^{-1}$ ,<sup>2</sup> the small residual  $[\text{CF}_3\text{COOH}]$  had negligible ( $< 15 \text{ s}^{-1}$ ) effect on kinetics of  $(\text{CH}_3)_2\text{COO}$ .

## The heating and cooling methods of the flow tube reactor

The method described in our previous publication<sup>3</sup> was used to heat the flow tube reactor. Two temperature-controlled custom-made aluminum blocks were placed around the quartz-glass reactor tube. Each aluminum block has four 300 W cartridge heaters that are regulated using a LabVIEW based PID-controller program. The gases were pre-heated close to the setpoint temperature before entering the reactor. Temperature of the gas flow was measured continuously using a K-type thermocouple, which tip was placed in the middle of reactor axial direction just outside the radial area filled by the photolysis beam. The linear gas flow speed was about  $1 \text{ ms}^{-1}$ , ensuring that the gas mixture was completely replaced between photolysis laser pulses with a repetition rate of 1 Hz. Complete axial temperature profile within the overlap volume of the probe and the photolysis beams were measured separately for all experimental conditions (temperature, pressure, and flow rate) used in this work. The observed temperature  $2\sigma$  uncertainty in the measurement range 296–340 K was  $\leq \pm 1.0$  K.

For reactor cooling, the quartz-glass tube was replaced with a stainless steel reactor tube that was coated with halocarbon wax. Similar aluminum blocks to heating were constructed also for cooling. They were fitted with copper tubes connected to an external cooling bath circulation (Heto-Holten CBN 28-90/HMT 4000). Ethanol was employed as a heat transfer fluid below ambient temperature. The gases were pre-cooled close to the setpoint temperature before entering into the reactor. The observed temperature  $2\sigma$  uncertainty in the measurement range 243–310 K was  $\leq \pm 1.2$  K.

## Determination of $k_{\text{uni}}$ from the absorption trace of $(\text{CH}_3)_2\text{COO}$ and the diffusion loss of $(\text{CH}_3)_2\text{COO}$

As is mentioned in the main text, the observed decay of  $(\text{CH}_3)_2\text{COO}$  mainly contain contributions from the thermal unimolecular reaction and self-reaction, but also a small contribution from the gas diffusion loss and to some small extend from the possible reaction with other reactive species. The rate equation to describe the loss of  $(\text{CH}_3)_2\text{COO}$  can be written as

$$\begin{aligned} -\frac{d[(\text{CH}_3)_2\text{COO}]}{dt} &= k_{\text{uni}}[(\text{CH}_3)_2\text{COO}] + 2k_{\text{self}}[(\text{CH}_3)_2\text{COO}]^2 + \\ &\quad k_{\text{bi}}[\text{X}][(\text{CH}_3)_2\text{COO}] + k_{\text{loss}}[(\text{CH}_3)_2\text{COO}] \\ &= (k_{\text{uni}} + k_{\text{loss}} + 2k_{\text{self}}[(\text{CH}_3)_2\text{COO}] + k_{\text{bi}}[\text{X}])(\text{CH}_3)_2\text{COO}, \end{aligned} \quad (\text{S4})$$

where  $k_{\text{uni}}$  is the unimolecular reaction rate coefficient,  $k_{\text{self}}$  is the rate coefficient for the self-reaction  $(\text{CH}_3)_2\text{COO} + (\text{CH}_3)_2\text{COO}$ ,  $[\text{X}]$  is the total concentration of other possible reactive species contributing to the bimolecular loss (originating, for example, from  $(\text{CH}_3)_2\text{COO} + \text{Br}$  reaction) with a combined rate coefficient  $k_{\text{bi}}$ , and  $k_{\text{loss}}$  is the diffusion loss rate coefficient. Although the self-reaction rate coefficient for  $(\text{CH}_3)_2\text{COO}$  is large,  $(6.0 \pm 1.1) \times 10^{-10} \text{ cm}^3 \text{ molecule}^{-1} \text{ s}^{-1}$ ,<sup>4</sup> the thermal unimolecular reaction is the main loss mechanism in the current system due to the low initial  $(\text{CH}_3)_2\text{COO}$  concentration (typically  $[(\text{CH}_3)_2\text{COO}]_0 < 10^{11} \text{ molecule cm}^{-3}$ ) used in the measurements. Thus, the decay traces of  $(\text{CH}_3)_2\text{COO}$  were fitted to an integrated first order decay expression, which is derived from the simplified model (Equation S5), where the term  $2k_{\text{self}}[(\text{CH}_3)_2\text{COO}] + k_{\text{bi}}[\text{X}]$  of Equation S4 is approximated as a constant  $k_{\text{eff}}[\text{X}_{\text{eff}}]$ <sup>5</sup>

$$-\frac{d[(\text{CH}_3)_2\text{COO}]}{dt} = (k_{\text{uni}} + k_{\text{loss}} + k_{\text{eff}}[\text{X}_{\text{eff}}])(\text{CH}_3)_2\text{COO} = k_{\text{obs}}[(\text{CH}_3)_2\text{COO}]. \quad (\text{S5})$$

The integrated first-order decay expression is

$$[(\text{CH}_3)_2\text{COO}]_t = [(\text{CH}_3)_2\text{COO}]_0 \times \exp(-k_{\text{obs}}t), \quad (\text{S6})$$

where  $k_{\text{obs}}$  is the obtained first-order decay rate coefficient,  $[(\text{CH}_3)_2\text{COO}]_t$  is the  $(\text{CH}_3)_2\text{COO}$  concentration at time  $t$ ,  $[(\text{CH}_3)_2\text{COO}]_0$  is the initial  $(\text{CH}_3)_2\text{COO}$  concentration (at time  $t=0$ ). This simplified method to describe the loss of  $(\text{CH}_3)_2\text{COO}$  and the use of single-exponential fitting method has been tested previously by Smith et al.<sup>5</sup> in the similar unimolecular decomposition study of  $(\text{CH}_3)_2\text{COO}$ . The single-exponential function fits reasonably well with the absorption traces, although the observed absorbance can be slightly higher than the fitted value just after the photolysis.

In the main text, Figure 2c shows the linear relationship of obtained first-order decay rate coefficients ( $k_{\text{obs}}$ ) with respect to  $[(\text{CH}_3)_2\text{COO}]_0$  under two different temperature and pressure conditions. The linear behavior suggests that  $[\text{X}_{\text{eff}}]$  is proportional to  $[(\text{CH}_3)_2\text{COO}]_0$ . This is expected since most of the reactive species, as well as  $(\text{CH}_3)_2\text{COO}$ , are formed at small concentrations proportional to  $[(\text{CH}_3)_2\text{ClBr}]_0$  and the laser pulse energy (assuming there are no other reactive species in the precursor mixture). Extrapolating the  $k_{\text{obs}}$  to zero  $[(\text{CH}_3)_2\text{COO}]_0$  removes the effect of radical – radical processes. Hence, the unimolecular reaction rate coefficient of  $(\text{CH}_3)_2\text{COO}$  can be determined from the intercept ( $k_{\text{ic}}$ ) of the linear least squares fit to the obtained kinetic data.

As is mentioned in the main text, a constant positive baseline offset was observed when  $(\text{CH}_3)_2\text{ClBr}$  was used as photolytic source, especially, in the kinetic measurements above room temperature (see Fig. 2a and Fig. S2). Depletion of  $(\text{CH}_3)_2\text{ClBr}$  does not cause a negative baseline shift of the measured absorption signal, such as the use of  $(\text{CH}_3)_2\text{Cl}_2$  in the study of Smith et al.,<sup>5</sup> due to the significantly lower absorption of  $(\text{CH}_3)_2\text{ClBr}$  at 340 nm region.

The offset value increases when  $[(\text{CH}_3)_2\text{COO}]_0$  increases, but maintains its relative value with respect to absorbance (see Fig. S2). The offset is independent of pressure, but increases as temperature increases, indicating possible absorption by a formed (seemingly nonreactive within the experimental time-scale  $\sim 50$  ms) product, which may have formed, for example, in the photodissociation of  $(\text{CH}_3)_2\text{ClBr}$  (see Fig. 2 and Fig. S3). Overall, the positive baseline offset was between about 9% (at 243 K) and 20% (at 340 K) of the  $(\text{CH}_3)_2\text{COO}$  absorption. The baseline offset has been taken into account in the fitting of the first-order single exponential decays. Assuming that formed product does not react with  $(\text{CH}_3)_2\text{COO}$  (or other reactive species) and, therefore, does not decay within a (short) measurement timescale, we can use the following equation (Equation 3 in the main text) for the absorption traces,

$$A_t = A_0 \times \exp(-k_{\text{obs}}t) + A_{\text{offset}}, \quad (\text{S7})$$

where  $k_{\text{obs}}$  is the obtained first-order decay rate coefficient,  $A_t$  is the absorbance at time  $t$ ,  $A_0$  is the initial absorbance (at time  $t=0$ ), and  $A_{\text{offset}}$  is the constant absorbance caused by nonreactive species (formed at time  $t=0$ ). Figure S3 shows two examples of measured transient absorption traces of  $(\text{CH}_3)_2\text{COO}$  at 243 K and 340 K. The complete experimental conditions and results for the fittings of the data measured at different temperatures are shown in Table S2.

An exercise was performed to fit Figure S3b signal also with an expression  $A_t = A_0 \times \exp(-k_{\text{obs}}t) + A_{\text{offset}} \times (1 - \exp(-k_{\text{obs}}t))$ , corresponding to situation where positive baseline offset is formed with the same rate as  $(\text{CH}_3)_2\text{COO}$  is decayed. This would correspond to a situation, where  $(\text{CH}_3)_2\text{COO}$  unimolecularly reacts and form a product that absorbs at the detection wavelength, see Figure S4. Interestingly, fits  $A_t = A_0 \times \exp(-k_{\text{obs}}t) + A_{\text{offset}}$  and  $A_t = A_0 \times \exp(-k_{\text{obs}}t) + A_{\text{offset}} \times (1 - \exp(-k_{\text{obs}}t))$  returned very similar values,

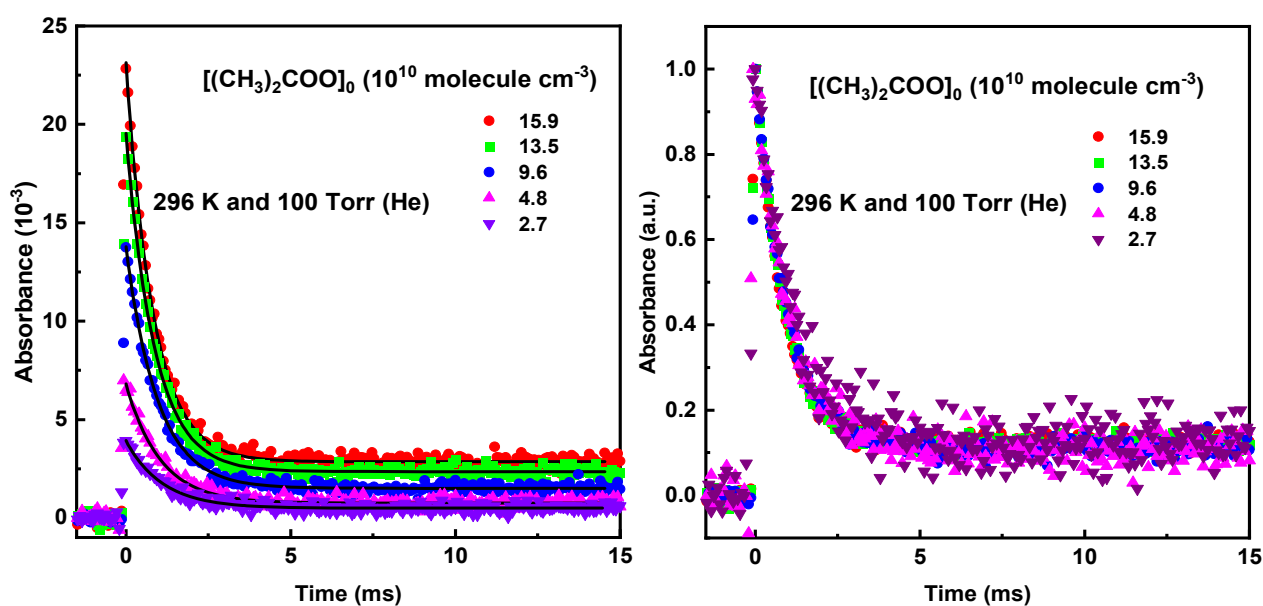

Figure S2. The decay trace of  $(\text{CH}_3)_2\text{COO}$  for various initial  $[(\text{CH}_3)_2\text{COO}]_0$  at 296 K and 100 Torr (in He). On the left is Figure 2a of the main text. On the right are the relative absorbances of Figure 2a. The  $(\text{CH}_3)_2\text{COO}$  traces were probed at 338 nm with a time resolution of 67  $\mu\text{s}$ .

$k_{\text{obs}} = 5903 \text{ s}^{-1}$  and  $k_{\text{obs}} = 6000 \text{ s}^{-1}$ , giving difference  $< 2 \%$ . This shows that regardless of the exact mechanism of positive baseline offset formation, the current fittings and results are reliable.

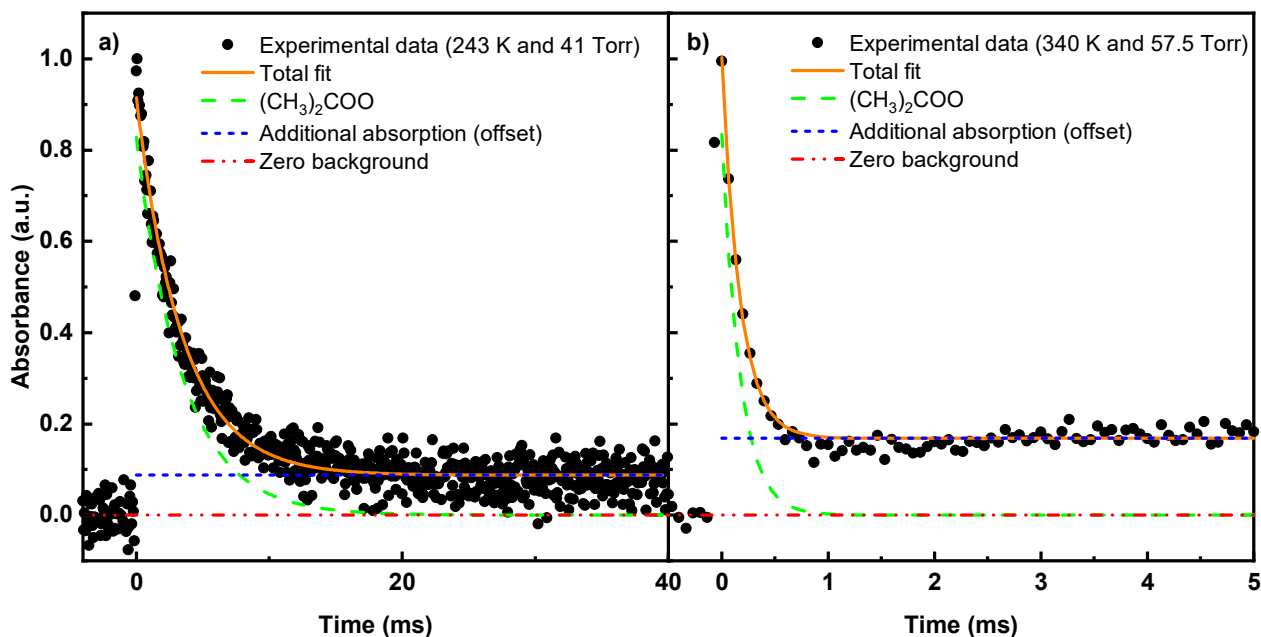

Figure S3. The transient absorption signals of  $(\text{CH}_3)_2\text{COO}$  at a) 243 K and 41 Torr (in  $\text{N}_2$ ) and at b) 340 K and 57.5 Torr (in He).  $(\text{CH}_3)_2\text{ClBr}$  used as photolytic source. The  $(\text{CH}_3)_2\text{COO}$  traces were probed at 338 nm with a time resolution of 67  $\mu\text{s}$ .

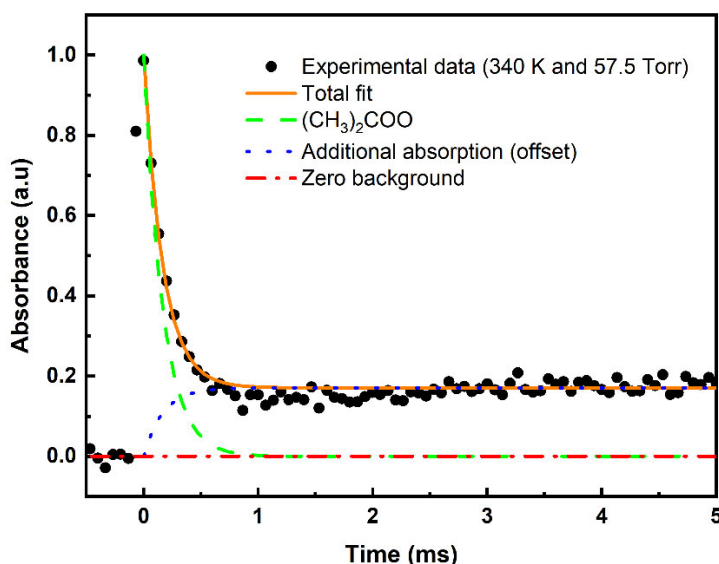

Figure S4. The transient absorption signal of  $(\text{CH}_3)_2\text{COO}$  at 340 K and 57.5 Torr (in He) from Figure S3b fitted with function  $A_t = A_0 \times \exp(-k_{\text{obs}}) + A_{\text{offset}} \times (1 - \exp(-k_{\text{obs}}))$  and returning value  $k_{\text{obs}} = 6000 \text{ s}^{-1}$ . This value can be compared with the original fitted value  $5903 \text{ s}^{-1}$  obtained using expression S7 above.  $(\text{CH}_3)_2\text{ClBr}$  used as photolytic source. The  $(\text{CH}_3)_2\text{COO}$  traces were probed at 338 nm with a time resolution of 67  $\mu\text{s}$ .

The diffusion loss ( $k_{\text{loss}}$ ), which originates from the diffusion out of the measurement volume (mainly in radial direction), was determined by measuring the diffusion loss of  $\text{CH}_2\text{OO}$  under the same experimental conditions with the TR-BB-CEAS-apparatus. The thermal decomposition rate coefficient of  $\text{CH}_2\text{OO}$  is negligible below 375 K.<sup>3,6</sup> Approximating the diffusivities of  $\text{CH}_2\text{OO}$  and  $(\text{CH}_3)_2\text{COO}$  with those of  $\text{HCOOH}$  and  $\text{CH}_3(\text{CH}_3)\text{CHCOOH}$ ,<sup>7</sup> we obtain for the  $k_{\text{uni}} = k_{\text{ic}}((\text{CH}_3)_2\text{COO}) - k_{\text{loss}}((\text{CH}_3)_2\text{COO}) = k_{\text{ic}}((\text{CH}_3)_2\text{COO}) - D(\text{CH}_3(\text{CH}_3)\text{CHCOOH})/D(\text{HCOOH}) \times k_{\text{loss}}(\text{CH}_2\text{OO}) = k_{\text{ic}}((\text{CH}_3)_2\text{COO}) - 0.52 \times k_{\text{loss}}(\text{CH}_2\text{OO})$  at a given temperature and total density. All the transient absorption traces of  $\text{CH}_2\text{OO}$  were measured at 338 nm and fitted to first-order, single exponential decay function. The initial  $\text{CH}_2\text{OO}$  concentration used in the measurements was below  $2.0 \times 10^{11}$  molecule  $\text{cm}^{-3}$ , which efficiently suppressed radical-radical, especially  $\text{CH}_2\text{OO} - \text{CH}_2\text{OO}$ , reactions. The values of  $k_{\text{loss}}(\text{CH}_2\text{OO})$  at each total density stay almost constant in all temperatures. The diffusion depends on the buffer-gas and Table S1 presents the obtained  $k_{\text{loss}}(\text{CH}_2\text{OO})$  values in the experimental conditions used in this work. The  $k_{\text{loss}}(\text{CH}_2\text{OO})$  values measured in helium buffer-gas (296–340 K) are taken from our previous unimolecular decomposition study of  $\text{CH}_2\text{OO}$ .<sup>3</sup>

**Table S1** The obtained  $k_{\text{loss}}(\text{CH}_2\text{OO})$  values in the experimental conditions used in this work. The  $k_{\text{loss}}(\text{CH}_3)_2\text{COO}$  values are calculated as  $0.52 \times k_{\text{loss}}(\text{CH}_2\text{OO})$ .

| $T(\text{K})$ | $^a[\text{N}_2] (\times 10^{18}$<br>molecule<br>$\text{cm}^{-3})$ | $k_{\text{loss}}(\text{CH}_2\text{OO})$<br>( $\text{s}^{-1}$ ) | $k_{\text{loss}}$<br>( $\text{CH}_3)_2\text{COO}$ )<br>( $\text{s}^{-1}$ ) | $T(\text{K})$ | $^a[\text{He}] (\times 10^{18}$<br>molecule $\text{cm}^{-3})$ | $^b k_{\text{loss}}$<br>( $\text{CH}_2\text{OO}$ )<br>( $\text{s}^{-1}$ ) | $k_{\text{loss}}$<br>( $\text{CH}_3)_2\text{COO}$ )<br>( $\text{s}^{-1}$ ) |
|---------------|-------------------------------------------------------------------|----------------------------------------------------------------|----------------------------------------------------------------------------|---------------|---------------------------------------------------------------|---------------------------------------------------------------------------|----------------------------------------------------------------------------|
| 243–          | 0.16                                                              | 30                                                             | 16                                                                         | 296–          | 0.16                                                          | 100                                                                       | 52                                                                         |
| 310           | 0.33                                                              | 20                                                             | 10                                                                         | 340           | 0.33                                                          | 62                                                                        | 32                                                                         |
|               | 1.6                                                               | 10                                                             | 5                                                                          |               | 1.6                                                           | 29                                                                        | 15                                                                         |
|               | 3.3                                                               | 7                                                              | 4                                                                          |               | 3.3                                                           | 24                                                                        | 12                                                                         |
|               | 6.5                                                               | 5                                                              | 3                                                                          |               | 6.5                                                           | 19                                                                        | 10                                                                         |

<sup>a</sup>The fixed  $\text{O}_2$  concentration was  $\sim 4 \times 10^{16}$  molecule  $\text{cm}^{-3}$  and the initial  $\text{CH}_2\text{OO}$  concentration was below  $2.0 \times 10^{11}$  molecule  $\text{cm}^{-3}$ . <sup>b</sup>Taken from our previous study.<sup>3</sup>



**Table S2** Results and conditions of the unimolecular reaction kinetic experiments of  $(\text{CH}_3)_2\text{COO}$  presented in this study. Some of the pressures have been measured twice and the average of the measurements is reported in the article.

| $T(\text{K})$ | Total number density ( $\times 10^{18}$ molecule $\text{cm}^{-3}$ ) | Buffer gas   | $^a p$ (Torr) | $k_{\text{obs}}$ ( $\text{s}^{-1}$ ) | $[(\text{CH}_3)_2\text{ClBr}]_0$ ( $\times 10^{13}$ molecule $\text{cm}^{-3}$ ) | Laser intensity ( $\text{mJ cm}^{-2}$ ) | Number of average | $\Delta A$ ( $\times 10^{-3}$ ) | Baseline shift ( $\times 10^{-3}$ ) | $\Delta A$ Criegee ( $\times 10^{-3}$ ) | $[(\text{CH}_3)_2\text{COO}]_0$ ( $\times 10^{10}$ molecule $\text{cm}^{-3}$ ) |
|---------------|---------------------------------------------------------------------|--------------|---------------|--------------------------------------|---------------------------------------------------------------------------------|-----------------------------------------|-------------------|---------------------------------|-------------------------------------|-----------------------------------------|--------------------------------------------------------------------------------|
| 243           | 0.16                                                                | $\text{N}_2$ | 4.1           | $222 \pm 7$                          | 3.99                                                                            | 5.66                                    | 2772              | 8.42                            | 0.87                                | 7.55                                    | 5.92                                                                           |
|               | 0.16                                                                | $\text{N}_2$ | 4.1           | $166 \pm 8$                          | 2.06                                                                            | 5.66                                    | 2228              | 4.65                            | 0.42                                | 4.23                                    | 3.32                                                                           |
|               | 0.16                                                                | $\text{N}_2$ | 4.1           | $141 \pm 9$                          | 1.12                                                                            | 5.66                                    | 3664              | 2.73                            | 0.28                                | 2.45                                    | 1.92                                                                           |
|               | 0.16                                                                | $\text{N}_2$ | 4.1           | $311 \pm 10$                         | 5.15                                                                            | 4.53                                    | 1775              | 12.17                           | 1.28                                | 10.89                                   | 8.54                                                                           |
|               | 0.16                                                                | $\text{N}_2$ | 4.1           | $258 \pm 7$                          | 4.23                                                                            | 4.53                                    | 3352              | 9.75                            | 0.96                                | 8.79                                    | 6.90                                                                           |
|               | 0.16                                                                | $\text{N}_2$ | 4.1           | $171 \pm 8$                          | 2.20                                                                            | 4.53                                    | 2196              | 4.95                            | 0.32                                | 4.63                                    | 3.63                                                                           |
|               | 0.16                                                                | $\text{N}_2$ | 4.1           | $139 \pm 10$                         | 1.22                                                                            | 4.53                                    | 3238              | 2.83                            | 0.20                                | 2.63                                    | 2.06                                                                           |
|               | 0.33                                                                | $\text{N}_2$ | 8.2           | $352 \pm 11$                         | 5.26                                                                            | 4.53                                    | 1792              | 13.95                           | 1.38                                | 12.57                                   | 9.86                                                                           |
|               | 0.33                                                                | $\text{N}_2$ | 8.2           | $299 \pm 9$                          | 4.26                                                                            | 4.53                                    | 2097              | 11.37                           | 1.05                                | 10.32                                   | 8.09                                                                           |
|               | 0.33                                                                | $\text{N}_2$ | 8.2           | $197 \pm 9$                          | 2.20                                                                            | 4.53                                    | 2209              | 5.88                            | 0.48                                | 5.40                                    | 4.24                                                                           |
|               | 0.33                                                                | $\text{N}_2$ | 8.2           | $151 \pm 9$                          | 1.21                                                                            | 4.53                                    | 3722              | 3.26                            | 0.30                                | 2.96                                    | 2.32                                                                           |
|               | 1.6                                                                 | $\text{N}_2$ | 41            | $288 \pm 10$                         | 4.63                                                                            | 3.96                                    | 1504              | 10.07                           | 0.96                                | 9.11                                    | 7.15                                                                           |
|               | 1.6                                                                 | $\text{N}_2$ | 41            | $236 \pm 8$                          | 3.75                                                                            | 3.96                                    | 2431              | 8.06                            | 0.75                                | 7.31                                    | 5.73                                                                           |
|               | 1.6                                                                 | $\text{N}_2$ | 41            | $160 \pm 9$                          | 1.91                                                                            | 3.96                                    | 2962              | 4.00                            | 0.35                                | 3.65                                    | 2.86                                                                           |
|               | 1.6                                                                 | $\text{N}_2$ | 41            | $114 \pm 10$                         | 1.47                                                                            | 3.96                                    | 5007              | 2.20                            | 0.16                                | 2.04                                    | 1.60                                                                           |
|               | 3.3                                                                 | $\text{N}_2$ | 82            | $223 \pm 6$                          | 5.50                                                                            | 3.96                                    | 3307              | 8.34                            | 0.89                                | 7.45                                    | 5.84                                                                           |
|               | 3.3                                                                 | $\text{N}_2$ | 82            | $202 \pm 8$                          | 4.44                                                                            | 3.96                                    | 2103              | 6.89                            | 0.60                                | 6.29                                    | 4.94                                                                           |
|               | 3.3                                                                 | $\text{N}_2$ | 82            | $122 \pm 8$                          | 2.30                                                                            | 3.96                                    | 3134              | 3.38                            | 0.23                                | 3.15                                    | 2.47                                                                           |
|               | 3.3                                                                 | $\text{N}_2$ | 82            | $97 \pm 8$                           | 1.28                                                                            | 3.96                                    | 6139              | 1.88                            | 0.18                                | 1.70                                    | 1.34                                                                           |
|               | 3.3                                                                 | $\text{N}_2$ | 82            | $240 \pm 9$                          | 4.79                                                                            | 3.96                                    | 2148              | 7.68                            | 0.69                                | 6.99                                    | 5.48                                                                           |
| 3.3           | $\text{N}_2$                                                        | 82           | $201 \pm 8$   | 3.89                                 | 3.96                                                                            | 3234                                    | 5.93              | 0.48                            | 5.45                                | 4.28                                    |                                                                                |
| 3.3           | $\text{N}_2$                                                        | 82           | $133 \pm 7$   | 2.04                                 | 3.96                                                                            | 6152                                    | 2.91              | 0.18                            | 2.73                                | 2.14                                    |                                                                                |
| 3.3           | $\text{N}_2$                                                        | 82           | $77 \pm 8$    | 1.12                                 | 3.96                                                                            | 9108                                    | 1.44              | 0.00                            | 1.44                                | 1.13                                    |                                                                                |

| $T(K)$ | Total number density ( $\times 10^{18}$ molecule $\text{cm}^{-3}$ ) | Buffer gas     | $^{\circ}p$ (Torr) | $k_{\text{obs}}$ ( $\text{s}^{-1}$ ) | $[(\text{CH}_3)_2\text{CIBr}]_0$ ( $\times 10^{13}$ molecule $\text{cm}^{-3}$ ) | Laser intensity ( $\text{mJ cm}^{-2}$ ) | Number of average | $\Delta A$ ( $\times 10^{-3}$ ) | Baseline shift ( $\times 10^{-3}$ ) | $\Delta A$ Criegee ( $\times 10^{-3}$ ) | $[(\text{CH}_3)_2\text{COO}]_0$ ( $\times 10^{10}$ molecule $\text{cm}^{-3}$ ) |
|--------|---------------------------------------------------------------------|----------------|--------------------|--------------------------------------|---------------------------------------------------------------------------------|-----------------------------------------|-------------------|---------------------------------|-------------------------------------|-----------------------------------------|--------------------------------------------------------------------------------|
| 253    | 0.16                                                                | N <sub>2</sub> | 4.3                | 288 ± 10                             | 4.67                                                                            | 5.66                                    | 1301              | 10.96                           | 1.18                                | 9.78                                    | 7.67                                                                           |
|        | 0.16                                                                | N <sub>2</sub> | 4.3                | 264 ± 10                             | 3.74                                                                            | 5.66                                    | 1432              | 9.33                            | 0.93                                | 8.40                                    | 6.59                                                                           |
|        | 0.16                                                                | N <sub>2</sub> | 4.3                | 191 ± 7                              | 1.97                                                                            | 5.66                                    | 3823              | 4.60                            | 0.39                                | 4.21                                    | 3.30                                                                           |
|        | 0.16                                                                | N <sub>2</sub> | 4.3                | 155 ± 9                              | 1.08                                                                            | 5.66                                    | 5048              | 2.58                            | 0.22                                | 2.36                                    | 1.85                                                                           |
|        | 0.16                                                                | N <sub>2</sub> | 4.3                | 301 ± 10                             | 4.75                                                                            | 3.96                                    | 1932              | 10.41                           | 1.12                                | 9.29                                    | 7.29                                                                           |
|        | 0.16                                                                | N <sub>2</sub> | 4.3                | 284 ± 9                              | 3.87                                                                            | 3.96                                    | 3650              | 8.73                            | 0.90                                | 7.83                                    | 6.14                                                                           |
|        | 0.16                                                                | N <sub>2</sub> | 4.3                | 198 ± 10                             | 2.02                                                                            | 3.96                                    | 3335              | 4.31                            | 0.43                                | 3.88                                    | 3.04                                                                           |
|        | 0.16                                                                | N <sub>2</sub> | 4.3                | 165 ± 15                             | 1.12                                                                            | 3.96                                    | 3011              | 2.44                            | 0.25                                | 2.19                                    | 1.72                                                                           |
|        | 0.33                                                                | N <sub>2</sub> | 8.5                | 345 ± 9                              | 4.78                                                                            | 4.53                                    | 2470              | 12.55                           | 1.20                                | 11.35                                   | 8.90                                                                           |
|        | 0.33                                                                | N <sub>2</sub> | 8.5                | 311 ± 8                              | 3.85                                                                            | 4.53                                    | 2449              | 10.65                           | 0.98                                | 9.67                                    | 7.59                                                                           |
|        | 0.33                                                                | N <sub>2</sub> | 8.5                | 217 ± 8                              | 1.99                                                                            | 4.53                                    | 2776              | 5.33                            | 0.46                                | 4.87                                    | 3.82                                                                           |
|        | 0.33                                                                | N <sub>2</sub> | 8.5                | 157 ± 8                              | 1.13                                                                            | 4.53                                    | 5331              | 2.93                            | 0.26                                | 2.67                                    | 2.10                                                                           |
|        | 0.33                                                                | N <sub>2</sub> | 8.5                | 397 ± 11                             | 4.83                                                                            | 4.53                                    | 2042              | 13.24                           | 1.34                                | 11.90                                   | 9.34                                                                           |
|        | 0.33                                                                | N <sub>2</sub> | 8.5                | 334 ± 9                              | 3.93                                                                            | 4.53                                    | 3262              | 10.15                           | 0.97                                | 9.18                                    | 7.20                                                                           |
|        | 0.33                                                                | N <sub>2</sub> | 8.5                | 228 ± 9                              | 2.04                                                                            | 4.53                                    | 3737              | 5.04                            | 0.39                                | 4.65                                    | 3.65                                                                           |
|        | 0.33                                                                | N <sub>2</sub> | 8.5                | 193 ± 11                             | 1.12                                                                            | 4.53                                    | 6186              | 3.28                            | 0.30                                | 2.98                                    | 2.33                                                                           |
|        | 1.6                                                                 | N <sub>2</sub> | 42.6               | 334 ± 11                             | 4.63                                                                            | 4.53                                    | 2295              | 6.82                            | 0.61                                | 6.21                                    | 4.87                                                                           |
|        | 1.6                                                                 | N <sub>2</sub> | 42.6               | 283 ± 9                              | 3.78                                                                            | 4.53                                    | 2984              | 5.39                            | 0.47                                | 4.92                                    | 3.86                                                                           |
|        | 1.6                                                                 | N <sub>2</sub> | 42.6               | 202 ± 10                             | 1.96                                                                            | 4.53                                    | 4163              | 2.56                            | 0.20                                | 2.36                                    | 1.85                                                                           |
|        | 1.6                                                                 | N <sub>2</sub> | 42.6               | 165 ± 14                             | 1.09                                                                            | 4.53                                    | 4611              | 1.40                            | 0.14                                | 1.26                                    | 0.99                                                                           |
|        | 1.6                                                                 | N <sub>2</sub> | 42.6               | 361 ± 9                              | 4.75                                                                            | 4.53                                    | 2786              | 12.32                           | 1.29                                | 11.03                                   | 8.65                                                                           |
|        | 1.6                                                                 | N <sub>2</sub> | 42.6               | 319 ± 10                             | 3.83                                                                            | 4.53                                    | 2429              | 10.19                           | 1.07                                | 9.12                                    | 7.15                                                                           |
|        | 1.6                                                                 | N <sub>2</sub> | 42.6               | 218 ± 10                             | 1.97                                                                            | 4.53                                    | 3255              | 5.11                            | 0.50                                | 4.61                                    | 3.61                                                                           |
|        | 1.6                                                                 | N <sub>2</sub> | 42.6               | 172 ± 12                             | 1.09                                                                            | 4.53                                    | 3553              | 2.89                            | 0.32                                | 2.57                                    | 2.02                                                                           |
|        | 3.3                                                                 | N <sub>2</sub> | 85.3               | 325 ± 12                             | 4.79                                                                            | 4.53                                    | 1540              | 10.27                           | 0.74                                | 9.53                                    | 7.47                                                                           |
|        | 3.3                                                                 | N <sub>2</sub> | 85.3               | 290 ± 11                             | 3.86                                                                            | 4.53                                    | 2105              | 8.56                            | 0.70                                | 7.86                                    | 6.16                                                                           |
|        | 3.3                                                                 | N <sub>2</sub> | 85.3               | 211 ± 11                             | 2.01                                                                            | 4.53                                    | 3313              | 4.29                            | 0.41                                | 3.88                                    | 3.04                                                                           |
|        | 3.3                                                                 | N <sub>2</sub> | 85.3               | 149 ± 12                             | 1.11                                                                            | 4.53                                    | 3895              | 2.31                            | 0.19                                | 2.12                                    | 1.66                                                                           |

| $T(K)$ | Total number density ( $\times 10^{18}$ molecule $\text{cm}^{-3}$ ) | Buffer gas     | $^{\circ}p$ (Torr) | $k_{\text{obs}}$ ( $\text{s}^{-1}$ ) | $[(\text{CH}_3)_2\text{ClBr}]_0$ ( $\times 10^{13}$ molecule $\text{cm}^{-3}$ ) | Laser intensity ( $\text{mJ cm}^{-2}$ ) | Number of average | $\Delta A$ ( $\times 10^{-3}$ ) | Baseline shift ( $\times 10^{-3}$ ) | $\Delta A$ Criegee ( $\times 10^{-3}$ ) | $[(\text{CH}_3)_2\text{COO}]_0$ ( $\times 10^{10}$ molecule $\text{cm}^{-3}$ ) |
|--------|---------------------------------------------------------------------|----------------|--------------------|--------------------------------------|---------------------------------------------------------------------------------|-----------------------------------------|-------------------|---------------------------------|-------------------------------------|-----------------------------------------|--------------------------------------------------------------------------------|
| 263    | 0.16                                                                | N <sub>2</sub> | 4.4                | 327 ± 10                             | 4.67                                                                            | 4.53                                    | 1914              | 10.08                           | 0.96                                | 9.12                                    | 7.16                                                                           |
|        | 0.16                                                                | N <sub>2</sub> | 4.4                | 302 ± 10                             | 3.81                                                                            | 4.53                                    | 2010              | 8.23                            | 0.75                                | 7.48                                    | 5.87                                                                           |
|        | 0.16                                                                | N <sub>2</sub> | 4.4                | 229 ± 11                             | 1.94                                                                            | 4.53                                    | 3517              | 4.03                            | 0.34                                | 3.69                                    | 2.89                                                                           |
|        | 0.16                                                                | N <sub>2</sub> | 4.4                | 200 ± 11                             | 1.04                                                                            | 4.53                                    | 7885              | 2.29                            | 0.21                                | 2.08                                    | 1.63                                                                           |
|        | 0.16                                                                | N <sub>2</sub> | 4.4                | 356 ± 15                             | 4.75                                                                            | 3.96                                    | 1306              | 9.83                            | 0.95                                | 8.88                                    | 6.96                                                                           |
|        | 0.16                                                                | N <sub>2</sub> | 4.4                | 318 ± 11                             | 3.89                                                                            | 3.96                                    | 2716              | 8.07                            | 0.79                                | 7.28                                    | 5.71                                                                           |
|        | 0.16                                                                | N <sub>2</sub> | 4.4                | 253 ± 12                             | 2.04                                                                            | 3.96                                    | 3362              | 4.24                            | 0.31                                | 3.93                                    | 3.08                                                                           |
|        | 0.16                                                                | N <sub>2</sub> | 4.4                | 208 ± 17                             | 1.13                                                                            | 3.96                                    | 3652              | 2.32                            | 0.15                                | 2.17                                    | 1.71                                                                           |
|        | 0.33                                                                | N <sub>2</sub> | 8.9                | 377 ± 13                             | 4.74                                                                            | 4.53                                    | 1481              | 12.23                           | 1.14                                | 11.09                                   | 8.70                                                                           |
|        | 0.33                                                                | N <sub>2</sub> | 8.9                | 350 ± 10                             | 3.85                                                                            | 4.53                                    | 2302              | 10.33                           | 0.87                                | 9.46                                    | 7.42                                                                           |
|        | 0.33                                                                | N <sub>2</sub> | 8.9                | 247 ± 11                             | 1.99                                                                            | 4.53                                    | 2988              | 5.02                            | 0.43                                | 4.59                                    | 3.60                                                                           |
|        | 0.33                                                                | N <sub>2</sub> | 8.9                | 230 ± 13                             | 1.13                                                                            | 4.53                                    | 4789              | 3.09                            | 0.26                                | 2.83                                    | 2.22                                                                           |
|        | 0.33                                                                | N <sub>2</sub> | 8.9                | 380 ± 13                             | 4.83                                                                            | 3.96                                    | 1849              | 10.78                           | 1.13                                | 9.65                                    | 7.57                                                                           |
|        | 0.33                                                                | N <sub>2</sub> | 8.9                | 330 ± 13                             | 3.92                                                                            | 3.96                                    | 1746              | 8.72                            | 0.84                                | 7.88                                    | 6.18                                                                           |
|        | 0.33                                                                | N <sub>2</sub> | 8.9                | 253 ± 13                             | 2.05                                                                            | 3.96                                    | 3108              | 4.36                            | 0.40                                | 3.96                                    | 3.11                                                                           |
|        | 0.33                                                                | N <sub>2</sub> | 8.9                | 222 ± 18                             | 1.13                                                                            | 3.96                                    | 2914              | 2.62                            | 0.22                                | 2.40                                    | 1.88                                                                           |
|        | 1.6                                                                 | N <sub>2</sub> | 44.3               | 345 ± 12                             | 4.60                                                                            | 4.53                                    | 1669              | 9.81                            | 1.05                                | 8.76                                    | 6.87                                                                           |
|        | 1.6                                                                 | N <sub>2</sub> | 44.3               | 316 ± 11                             | 3.78                                                                            | 4.53                                    | 2438              | 8.28                            | 0.83                                | 7.45                                    | 5.84                                                                           |
|        | 1.6                                                                 | N <sub>2</sub> | 44.3               | 233 ± 11                             | 2.30                                                                            | 4.53                                    | 3167              | 4.26                            | 0.39                                | 3.87                                    | 3.03                                                                           |
|        | 1.6                                                                 | N <sub>2</sub> | 44.3               | 206 ± 16                             | 1.08                                                                            | 4.53                                    | 3540              | 2.44                            | 0.23                                | 2.21                                    | 1.74                                                                           |
| 1.6    | N <sub>2</sub>                                                      | 44.3           | 300 ± 13           | 4.71                                 | 3.96                                                                            | 1754                                    | 7.30              | 0.64                            | 6.66                                | 5.22                                    |                                                                                |
| 1.6    | N <sub>2</sub>                                                      | 44.3           | 280 ± 13           | 3.83                                 | 3.96                                                                            | 2300                                    | 5.78              | 0.44                            | 5.34                                | 4.19                                    |                                                                                |
| 1.6    | N <sub>2</sub>                                                      | 44.3           | 226 ± 15           | 1.99                                 | 3.96                                                                            | 3905                                    | 3.01              | 0.26                            | 2.75                                | 2.15                                    |                                                                                |
| 1.6    | N <sub>2</sub>                                                      | 44.3           | 175 ± 15           | 1.09                                 | 3.96                                                                            | 6874                                    | 1.62              | 0.11                            | 1.51                                | 1.18                                    |                                                                                |
| 3.3    | N <sub>2</sub>                                                      | 88.7           | 411 ± 13           | 4.78                                 | 4.53                                                                            | 1612                                    | 11.95             | 1.15                            | 10.80                               | 8.47                                    |                                                                                |
| 3.3    | N <sub>2</sub>                                                      | 88.7           | 357 ± 11           | 3.81                                 | 4.53                                                                            | 2372                                    | 9.94              | 0.89                            | 9.05                                | 7.09                                    |                                                                                |
| 3.3    | N <sub>2</sub>                                                      | 88.7           | 259 ± 10           | 1.99                                 | 4.53                                                                            | 3792                                    | 5.10              | 0.50                            | 4.60                                | 3.60                                    |                                                                                |

| $T(K)$ | 3.3<br>Total number<br>density ( $\times 10^{18}$<br>molecule<br>$\text{cm}^{-3}$ ) | $\text{N}_2$<br>Buffer<br>gas | 88.7<br>$^o p$<br>(Torr) | $198 \pm 14$<br>$k_{\text{obs}}$ ( $\text{s}^{-1}$ ) | 1.09<br>[[ $(\text{CH}_3)_2\text{ClBr}$ ] $_0$<br>( $\times 10^{13}$<br>molecule<br>$\text{cm}^{-3}$ ) | 4.53<br>Laser<br>intensity<br>( $\text{mJ cm}^{-2}$ ) | 3776<br>Number<br>of<br>average | 2.38<br>$\Delta A$<br>( $\times 10^{-3}$ ) | 0.03<br>Baseline<br>shift<br>( $\times 10^{-3}$ ) | 2.35<br>$\Delta A$<br>Criegee<br>( $\times 10^{-3}$ ) | 1.84<br>[[ $(\text{CH}_3)_2\text{COO}$ ] $_0$<br>( $\times 10^{10}$<br>molecule<br>$\text{cm}^{-3}$ ) |
|--------|-------------------------------------------------------------------------------------|-------------------------------|--------------------------|------------------------------------------------------|--------------------------------------------------------------------------------------------------------|-------------------------------------------------------|---------------------------------|--------------------------------------------|---------------------------------------------------|-------------------------------------------------------|-------------------------------------------------------------------------------------------------------|
| 263    | 3.3                                                                                 | $\text{N}_2$                  | 88.7                     | $408 \pm 12$                                         | 4.75                                                                                                   | 3.96                                                  | 2037                            | 11.74                                      | 1.06                                              | 10.68                                                 | 8.38                                                                                                  |
|        | 3.3                                                                                 | $\text{N}_2$                  | 88.7                     | $250 \pm 12$                                         | 2.03                                                                                                   | 3.96                                                  | 2989                            | 4.83                                       | 0.39                                              | 4.44                                                  | 3.48                                                                                                  |
|        | 3.3                                                                                 | $\text{N}_2$                  | 88.7                     | $210 \pm 17$                                         | 1.11                                                                                                   | 3.96                                                  | 3730                            | 2.58                                       | 0.32                                              | 2.26                                                  | 1.77                                                                                                  |
| 273    | 0.16                                                                                | $\text{N}_2$                  | 4.6                      | $419 \pm 14$                                         | 4.67                                                                                                   | 4.53                                                  | 2014                            | 10.21                                      | 1.04                                              | 9.17                                                  | 7.19                                                                                                  |
|        | 0.16                                                                                | $\text{N}_2$                  | 4.6                      | $384 \pm 12$                                         | 3.81                                                                                                   | 4.53                                                  | 2716                            | 8.46                                       | 0.81                                              | 7.65                                                  | 6.00                                                                                                  |
|        | 0.16                                                                                | $\text{N}_2$                  | 4.6                      | $307 \pm 14$                                         | 1.95                                                                                                   | 4.53                                                  | 3636                            | 4.23                                       | 0.32                                              | 3.91                                                  | 3.07                                                                                                  |
|        | 0.16                                                                                | $\text{N}_2$                  | 4.6                      | $286 \pm 18$                                         | 1.13                                                                                                   | 4.53                                                  | 5282                            | 2.55                                       | 0.22                                              | 2.33                                                  | 1.83                                                                                                  |
|        | 0.16                                                                                | $\text{N}_2$                  | 4.6                      | $423 \pm 21$                                         | 5.03                                                                                                   | 3.96                                                  | 1158                            | 8.83                                       | 0.81                                              | 8.02                                                  | 6.29                                                                                                  |
|        | 0.16                                                                                | $\text{N}_2$                  | 4.6                      | $307 \pm 17$                                         | 2.14                                                                                                   | 3.96                                                  | 5115                            | 3.39                                       | 0.28                                              | 3.11                                                  | 2.44                                                                                                  |
|        | 0.16                                                                                | $\text{N}_2$                  | 4.6                      | $285 \pm 24$                                         | 1.18                                                                                                   | 3.96                                                  | 6285                            | 1.92                                       | 0.14                                              | 1.78                                                  | 1.40                                                                                                  |
|        | 0.33                                                                                | $\text{N}_2$                  | 9.2                      | $421 \pm 15$                                         | 4.91                                                                                                   | 3.96                                                  | 2017                            | 9.31                                       | 0.90                                              | 8.41                                                  | 6.60                                                                                                  |
|        | 0.33                                                                                | $\text{N}_2$                  | 9.2                      | $406 \pm 18$                                         | 3.97                                                                                                   | 3.96                                                  | 1976                            | 7.67                                       | 0.66                                              | 7.01                                                  | 5.50                                                                                                  |
|        | 0.33                                                                                | $\text{N}_2$                  | 9.2                      | $308 \pm 14$                                         | 2.07                                                                                                   | 3.96                                                  | 4961                            | 3.81                                       | 0.30                                              | 3.51                                                  | 2.75                                                                                                  |
|        | 0.33                                                                                | $\text{N}_2$                  | 9.2                      | $316 \pm 29$                                         | 1.13                                                                                                   | 3.96                                                  | 4116                            | 2.14                                       | 0.17                                              | 1.97                                                  | 1.55                                                                                                  |
|        | 1.6                                                                                 | $\text{N}_2$                  | 46                       | $574 \pm 16$                                         | 5.09                                                                                                   | 4.53                                                  | 1624                            | 15.82                                      | 1.53                                              | 14.29                                                 | 11.21                                                                                                 |
|        | 1.6                                                                                 | $\text{N}_2$                  | 46                       | $532 \pm 14$                                         | 4.09                                                                                                   | 4.53                                                  | 2229                            | 13.08                                      | 1.24                                              | 11.84                                                 | 9.29                                                                                                  |
|        | 1.6                                                                                 | $\text{N}_2$                  | 46                       | $402 \pm 14$                                         | 2.12                                                                                                   | 4.53                                                  | 3714                            | 6.41                                       | 0.57                                              | 5.84                                                  | 4.58                                                                                                  |
|        | 1.6                                                                                 | $\text{N}_2$                  | 46                       | $324 \pm 19$                                         | 1.16                                                                                                   | 4.53                                                  | 4400                            | 3.43                                       | 0.29                                              | 3.14                                                  | 2.46                                                                                                  |
|        | 3.3                                                                                 | $\text{N}_2$                  | 92.1                     | $493 \pm 20$                                         | 4.83                                                                                                   | 3.96                                                  | 1842                            | 10.18                                      | 0.80                                              | 9.38                                                  | 7.35                                                                                                  |
| 3.3    | $\text{N}_2$                                                                        | 92.1                          | $469 \pm 18$             | 3.92                                                 | 3.96                                                                                                   | 2105                                                  | 9.19                            | 0.65                                       | 8.54                                              | 6.70                                                  |                                                                                                       |
| 3.3    | $\text{N}_2$                                                                        | 92.1                          | $366 \pm 21$             | 2.05                                                 | 3.96                                                                                                   | 3492                                                  | 4.16                            | 0.33                                       | 3.83                                              | 3.01                                                  |                                                                                                       |
| 3.3    | $\text{N}_2$                                                                        | 92.1                          | $330 \pm 29$             | 1.13                                                 | 3.96                                                                                                   | 4324                                                  | 2.42                            | 0.17                                       | 2.25                                              | 1.76                                                  |                                                                                                       |
| 283    | 0.16                                                                                | $\text{N}_2$                  | 4.8                      | $523 \pm 22$                                         | 4.78                                                                                                   | 4.53                                                  | 2182                            | 8.79                                       | 0.90                                              | 7.89                                                  | 6.19                                                                                                  |
|        | 0.16                                                                                | $\text{N}_2$                  | 4.8                      | $422 \pm 22$                                         | 3.00                                                                                                   | 4.53                                                  | 2142                            | 5.78                                       | 0.52                                              | 5.26                                                  | 4.12                                                                                                  |
|        | 0.16                                                                                | $\text{N}_2$                  | 4.8                      | $405 \pm 26$                                         | 2.07                                                                                                   | 4.53                                                  | 3146                            | 3.94                                       | 0.34                                              | 3.60                                                  | 2.82                                                                                                  |
|        | 0.16                                                                                | $\text{N}_2$                  | 4.8                      | $403 \pm 28$                                         | 1.13                                                                                                   | 4.53                                                  | 5974                            | 2.48                                       | 0.25                                              | 2.23                                                  | 1.75                                                                                                  |

| $T(K)$ | Total number density ( $\times 10^{18}$ molecule $\text{cm}^{-3}$ ) | Buffer gas     | $^{\circ}p$ (Torr) | $k_{\text{obs}}$ ( $\text{s}^{-1}$ ) | $[(\text{CH}_3)_2\text{ClBr}]_0$ ( $\times 10^{13}$ molecule $\text{cm}^{-3}$ ) | Laser intensity ( $\text{mJ cm}^{-2}$ ) | Number of average | $\Delta A$ ( $\times 10^{-3}$ ) | Baseline shift ( $\times 10^{-3}$ ) | $\Delta A$ Criegee ( $\times 10^{-3}$ ) | $[(\text{CH}_3)_2\text{COO}]_0$ ( $\times 10^{10}$ molecule $\text{cm}^{-3}$ ) |
|--------|---------------------------------------------------------------------|----------------|--------------------|--------------------------------------|---------------------------------------------------------------------------------|-----------------------------------------|-------------------|---------------------------------|-------------------------------------|-----------------------------------------|--------------------------------------------------------------------------------|
| 283    | 0.16                                                                | N <sub>2</sub> | 4.8                | 628 ± 21                             | 5.02                                                                            | 4.53                                    | 2161              | 12.79                           | 1.56                                | 11.239                                  | 8.81                                                                           |
|        | 0.16                                                                | N <sub>2</sub> | 4.8                | 542 ± 19                             | 4.09                                                                            | 4.53                                    | 2842              | 10.14                           | 1.11                                | 9.03                                    | 7.08                                                                           |
|        | 0.16                                                                | N <sub>2</sub> | 4.8                | 433 ± 27                             | 2.16                                                                            | 4.53                                    | 2586              | 4.85                            | 0.46                                | 4.39                                    | 3.44                                                                           |
|        | 0.16                                                                | N <sub>2</sub> | 4.8                | 416 ± 37                             | 1.19                                                                            | 4.53                                    | 3739              | 2.79                            | 0.22                                | 2.57                                    | 2.01                                                                           |
|        | 0.33                                                                | N <sub>2</sub> | 9.6                | 547 ± 23                             | 4.90                                                                            | 3.40                                    | 2135              | 8.42                            | 0.82                                | 7.60                                    | 5.96                                                                           |
|        | 0.33                                                                | N <sub>2</sub> | 9.6                | 505 ± 29                             | 3.98                                                                            | 3.40                                    | 1772              | 6.64                            | 0.61                                | 6.03                                    | 4.73                                                                           |
|        | 0.33                                                                | N <sub>2</sub> | 9.6                | 432 ± 29                             | 2.08                                                                            | 3.40                                    | 4443              | 3.24                            | 0.26                                | 2.98                                    | 2.34                                                                           |
|        | 0.33                                                                | N <sub>2</sub> | 9.6                | 354 ± 35                             | 1.15                                                                            | 3.40                                    | 6517              | 1.78                            | 0.17                                | 1.61                                    | 1.26                                                                           |
|        | 1.6                                                                 | N <sub>2</sub> | 47.8               | 740 ± 19                             | 4.89                                                                            | 5.10                                    | 1995              | 16.20                           | 1.55                                | 14.65                                   | 11.50                                                                          |
|        | 1.6                                                                 | N <sub>2</sub> | 47.8               | 680 ± 20                             | 3.97                                                                            | 5.10                                    | 2078              | 13.53                           | 1.28                                | 12.25                                   | 9.61                                                                           |
|        | 1.6                                                                 | N <sub>2</sub> | 47.8               | 564 ± 25                             | 2.05                                                                            | 5.10                                    | 2988              | 6.81                            | 0.61                                | 6.20                                    | 4.86                                                                           |
|        | 1.6                                                                 | N <sub>2</sub> | 47.8               | 523 ± 33                             | 1.13                                                                            | 5.10                                    | 4377              | 3.82                            | 0.34                                | 3.48                                    | 2.73                                                                           |
|        | 3.3                                                                 | N <sub>2</sub> | 95.5               | 643 ± 25                             | 4.83                                                                            | 3.96                                    | 2286              | 9.87                            | 0.80                                | 9.07                                    | 7.12                                                                           |
|        | 3.3                                                                 | N <sub>2</sub> | 95.5               | 625 ± 34                             | 3.90                                                                            | 3.96                                    | 1744              | 7.86                            | 0.64                                | 7.22                                    | 5.67                                                                           |
|        | 3.3                                                                 | N <sub>2</sub> | 95.5               | 527 ± 43                             | 2.01                                                                            | 3.96                                    | 2587              | 3.91                            | 0.33                                | 3.58                                    | 2.81                                                                           |
|        | 3.3                                                                 | N <sub>2</sub> | 95.5               | 454 ± 50                             | 1.11                                                                            | 3.96                                    | 4175              | 2.17                            | 0.18                                | 1.99                                    | 1.56                                                                           |
| 296    | 0.16                                                                | N <sub>2</sub> | 5                  | 851 ± 54                             | 4.99                                                                            | 3.96                                    | 2548              | 7.04                            | 0.72                                | 6.32                                    | 4.96                                                                           |
|        | 0.16                                                                | N <sub>2</sub> | 5                  | 758 ± 54                             | 4.08                                                                            | 3.96                                    | 3042              | 5.19                            | 0.49                                | 4.70                                    | 3.69                                                                           |
|        | 0.16                                                                | N <sub>2</sub> | 5                  | 690 ± 75                             | 2.14                                                                            | 3.96                                    | 5022              | 2.46                            | 0.21                                | 2.25                                    | 1.77                                                                           |
|        | 0.16                                                                | N <sub>2</sub> | 5                  | 657 ± 105                            | 1.19                                                                            | 3.96                                    | 7000              | 1.39                            | 0.14                                | 1.25                                    | 0.99                                                                           |
|        | 0.33                                                                | N <sub>2</sub> | 10                 | 962 ± 41                             | 4.79                                                                            | 3.96                                    | 1929              | 12.79                           | 1.47                                | 11.32                                   | 8.88                                                                           |
|        | 0.33                                                                | N <sub>2</sub> | 10                 | 921 ± 38                             | 3.90                                                                            | 3.96                                    | 2999              | 10.35                           | 1.13                                | 9.22                                    | 7.23                                                                           |
|        | 0.33                                                                | N <sub>2</sub> | 10                 | 791 ± 52                             | 2.03                                                                            | 3.96                                    | 2891              | 5.31                            | 0.50                                | 4.81                                    | 3.77                                                                           |
|        | 0.33                                                                | N <sub>2</sub> | 10                 | 697 ± 61                             | 1.10                                                                            | 3.96                                    | 5173              | 2.94                            | 0.25                                | 2.69                                    | 2.11                                                                           |
|        | 0.33                                                                | N <sub>2</sub> | 10                 | 1191 ± 29                            | 6.23                                                                            | 3.40                                    | 1904              | 18.71                           | 3.05                                | 15.66                                   | 12.28                                                                          |
|        | 0.33                                                                | N <sub>2</sub> | 10                 | 1066 ± 29                            | 5.04                                                                            | 3.40                                    | 2035              | 15.35                           | 2.39                                | 12.96                                   | 10.17                                                                          |
|        | 0.33                                                                | N <sub>2</sub> | 10                 | 917 ± 29                             | 3.40                                                                            | 3.40                                    | 2574              | 10.68                           | 1.51                                | 9.16                                    | 7.19                                                                           |

| $T(K)$ | 0.33                                                         | $N_2$      | 10            | $807 \pm 39$           | 1.79                                                       | 3.40                              | 4333              | 5.34                            | 0.63                                | 4.71                                    | 3.70                                                      |
|--------|--------------------------------------------------------------|------------|---------------|------------------------|------------------------------------------------------------|-----------------------------------|-------------------|---------------------------------|-------------------------------------|-----------------------------------------|-----------------------------------------------------------|
|        | Total number density ( $\times 10^{18}$ molecule $cm^{-3}$ ) | Buffer gas | $^o p$ (Torr) | $k_{obs}$ ( $s^{-1}$ ) | $[(CH_3)_2CIBr]_0$ ( $\times 10^{13}$ molecule $cm^{-3}$ ) | Laser intensity ( $mJ\ cm^{-2}$ ) | Number of average | $\Delta A$ ( $\times 10^{-3}$ ) | Baseline shift ( $\times 10^{-3}$ ) | $\Delta A$ Criegee ( $\times 10^{-3}$ ) | $[(CH_3)_2COO]_0$ ( $\times 10^{10}$ molecule $cm^{-3}$ ) |
| 296    | 1.6                                                          | $N_2$      | 50            | $1289 \pm 31$          | 6.09                                                       | 3.40                              | 2303              | 19.61                           | 2.57                                | 17.04                                   | 13.37                                                     |
|        | 1.6                                                          | $N_2$      | 50            | $1195 \pm 26$          | 4.90                                                       | 3.40                              | 3407              | 15.84                           | 2.05                                | 13.79                                   | 10.82                                                     |
|        | 1.6                                                          | $N_2$      | 50            | $1083 \pm 29$          | 3.31                                                       | 3.40                              | 3587              | 11.13                           | 1.33                                | 9.80                                    | 7.69                                                      |
|        | 1.6                                                          | $N_2$      | 50            | $1010 \pm 41$          | 1.75                                                       | 3.40                              | 4254              | 6.19                            | 0.70                                | 5.49                                    | 4.31                                                      |
|        | 6.5                                                          | $N_2$      | 200           | $1335 \pm 31$          | 6.28                                                       | 3.40                              | 1718              | 21.55                           | 2.65                                | 18.90                                   | 14.82                                                     |
|        | 6.5                                                          | $N_2$      | 200           | $1304 \pm 34$          | 5.04                                                       | 3.40                              | 1535              | 18.52                           | 2.18                                | 16.34                                   | 12.82                                                     |
|        | 6.5                                                          | $N_2$      | 200           | $1180 \pm 29$          | 3.40                                                       | 3.40                              | 3393              | 13.12                           | 1.44                                | 11.68                                   | 9.16                                                      |
|        | 6.5                                                          | $N_2$      | 200           | $1056 \pm 40$          | 1.78                                                       | 3.40                              | 3937              | 7.18                            | 0.81                                | 6.37                                    | 5.00                                                      |
| 310    | 0.33                                                         | $N_2$      | 10.5          | $1602 \pm 68$          | 4.20                                                       | 3.40                              | 2260              | 12.78                           | 1.94                                | 10.84                                   | 8.50                                                      |
|        | 0.33                                                         | $N_2$      | 10.5          | $1569 \pm 62$          | 3.42                                                       | 3.40                              | 2374              | 10.53                           | 1.51                                | 9.02                                    | 7.07                                                      |
|        | 0.33                                                         | $N_2$      | 10.5          | $1428 \pm 52$          | 2.60                                                       | 3.40                              | 3525              | 8.29                            | 1.13                                | 7.16                                    | 5.62                                                      |
|        | 0.33                                                         | $N_2$      | 10.5          | $1331 \pm 82$          | 1.79                                                       | 3.40                              | 3091              | 5.66                            | 0.71                                | 4.95                                    | 3.89                                                      |
|        | 1.6                                                          | $N_2$      | 52.3          | $1972 \pm 61$          | 6.14                                                       | 3.40                              | 1942              | 18.64                           | 2.44                                | 16.20                                   | 12.71                                                     |
|        | 1.6                                                          | $N_2$      | 52.3          | $1934 \pm 71$          | 4.95                                                       | 3.40                              | 2031              | 15.41                           | 1.96                                | 13.45                                   | 10.55                                                     |
|        | 1.6                                                          | $N_2$      | 52.3          | $1827 \pm 69$          | 3.34                                                       | 3.40                              | 2829              | 10.73                           | 1.28                                | 9.45                                    | 7.41                                                      |
|        | 1.6                                                          | $N_2$      | 52.3          | $1501 \pm 126$         | 1.74                                                       | 3.40                              | 2027              | 5.59                            | 0.68                                | 4.91                                    | 3.85                                                      |
| 296    | 0.16                                                         | He         | 5             | $848 \pm 26$           | 5.82                                                       | 3.40                              | 1067              | 16.00                           | 2.20                                | 13.80                                   | 10.8                                                      |
|        | 0.16                                                         | He         | 5             | $800 \pm 24$           | 4.72                                                       | 3.40                              | 1365              | 13.56                           | 1.66                                | 11.90                                   | 9.33                                                      |
|        | 0.16                                                         | He         | 5             | $750 \pm 26$           | 3.25                                                       | 3.40                              | 1602              | 9.71                            | 1.04                                | 8.67                                    | 6.80                                                      |
|        | 0.16                                                         | He         | 5             | $654 \pm 38$           | 1.71                                                       | 3.40                              | 1936              | 4.95                            | 0.48                                | 4.47                                    | 3.51                                                      |
|        | 0.16                                                         | He         | 5             | $668 \pm 42$           | 0.92                                                       | 3.40                              | 4442              | 2.88                            | 0.28                                | 2.60                                    | 2.04                                                      |
|        | 0.33                                                         | He         | 10            | $845 \pm 23$           | 5.91                                                       | 3.40                              | 1626              | 19.49                           | 2.31                                | 17.18                                   | 13.5                                                      |
|        | 0.33                                                         | He         | 10            | $798 \pm 22$           | 4.77                                                       | 3.40                              | 1708              | 16.40                           | 1.79                                | 14.61                                   | 11.5                                                      |
|        | 0.33                                                         | He         | 10            | $728 \pm 22$           | 3.28                                                       | 3.40                              | 1697              | 11.82                           | 1.16                                | 10.66                                   | 8.36                                                      |
|        | 0.33                                                         | He         | 10            | $682 \pm 33$           | 1.72                                                       | 3.40                              | 1674              | 6.23                            | 0.49                                | 5.74                                    | 4.50                                                      |
|        | 0.33                                                         | He         | 10            | $661 \pm 41$           | 0.92                                                       | 3.40                              | 3122              | 3.52                            | 0.28                                | 3.24                                    | 2.54                                                      |

| $T(K)$ | Total number density ( $\times 10^{18}$ molecule $\text{cm}^{-3}$ ) | Buffer gas | $^{\circ}p$ (Torr) | $k_{\text{obs}}$ ( $\text{s}^{-1}$ ) | $[(\text{CH}_3)_2\text{ClBr}]_0$ ( $\times 10^{13}$ molecule $\text{cm}^{-3}$ ) | Laser intensity ( $\text{mJ cm}^{-2}$ ) | Number of average | $\Delta A$ ( $\times 10^{-3}$ ) | Baseline shift ( $\times 10^{-3}$ ) | $\Delta A$ Criegee ( $\times 10^{-3}$ ) | $[(\text{CH}_3)_2\text{COO}]_0$ ( $\times 10^{10}$ molecule $\text{cm}^{-3}$ ) |      |
|--------|---------------------------------------------------------------------|------------|--------------------|--------------------------------------|---------------------------------------------------------------------------------|-----------------------------------------|-------------------|---------------------------------|-------------------------------------|-----------------------------------------|--------------------------------------------------------------------------------|------|
| 296    | 1.6                                                                 | He         | 50                 | $1082 \pm 25$                        | 5.82                                                                            | 3.40                                    | 1271              | 20.30                           | 2.50                                | 17.80                                   | 14.0                                                                           |      |
|        | 1.6                                                                 | He         | 50                 | $1044 \pm 26$                        | 4.67                                                                            | 3.40                                    | 1409              | 17.20                           | 2.05                                | 15.15                                   | 11.9                                                                           |      |
|        | 1.6                                                                 | He         | 50                 | $953 \pm 31$                         | 3.19                                                                            | 3.40                                    | 1575              | 12.07                           | 1.34                                | 10.73                                   | 8.41                                                                           |      |
|        | 1.6                                                                 | He         | 50                 | $838 \pm 41$                         | 1.67                                                                            | 3.40                                    | 2517              | 6.14                            | 0.63                                | 5.51                                    | 4.32                                                                           |      |
|        | 1.6                                                                 | He         | 50                 | $799 \pm 55$                         | 0.89                                                                            | 3.40                                    | 3422              | 3.63                            | 0.37                                | 3.26                                    | 2.56                                                                           |      |
|        | 3.3                                                                 | He         | 100                | $1203 \pm 26$                        | 5.91                                                                            | 3.40                                    | 1101              | 23.14                           | 2.85                                | 20.29                                   | 15.9                                                                           |      |
|        | 3.3                                                                 | He         | 100                | $1160 \pm 23$                        | 4.77                                                                            | 3.40                                    | 1919              | 19.56                           | 2.35                                | 17.21                                   | 13.5                                                                           |      |
|        | 3.3                                                                 | He         | 100                | $1046 \pm 26$                        | 3.24                                                                            | 3.40                                    | 2636              | 13.79                           | 1.50                                | 12.29                                   | 9.64                                                                           |      |
|        | 3.3                                                                 | He         | 100                | $957 \pm 45$                         | 1.69                                                                            | 3.40                                    | 2284              | 7.16                            | 0.75                                | 6.41                                    | 5.03                                                                           |      |
|        | 3.3                                                                 | He         | 100                | $888 \pm 63$                         | 0.90                                                                            | 3.40                                    | 2809              | 4.07                            | 0.49                                | 3.58                                    | 2.81                                                                           |      |
|        | 6.5                                                                 | He         | 200                | $1283 \pm 28$                        | 5.96                                                                            | 3.40                                    | 1340              | 23.92                           | 2.77                                | 21.15                                   | 16.6                                                                           |      |
|        | 6.5                                                                 | He         | 200                | $1141 \pm 39$                        | 3.26                                                                            | 3.40                                    | 1199              | 14.58                           | 1.56                                | 13.02                                   | 10.2                                                                           |      |
|        | 6.5                                                                 | He         | 200                | $1002 \pm 54$                        | 1.71                                                                            | 3.40                                    | 1637              | 7.64                            | 0.77                                | 6.87                                    | 5.38                                                                           |      |
|        | 6.5                                                                 | He         | 200                | $946 \pm 66$                         | 0.91                                                                            | 3.40                                    | 2547              | 4.46                            | 0.50                                | 3.96                                    | 3.11                                                                           |      |
|        | 310                                                                 | 0.16       | He                 | 5.2                                  | $1122 \pm 43$                                                                   | 5.82                                    | 3.40              | 1260                            | 14.50                               | 2.14                                    | 12.36                                                                          | 9.70 |
|        |                                                                     | 0.16       | He                 | 5.2                                  | $1068 \pm 42$                                                                   | 4.72                                    | 3.40              | 1503                            | 11.85                               | 1.64                                    | 10.21                                                                          | 8.01 |
| 0.16   |                                                                     | He         | 5.2                | $1044 \pm 52$                        | 3.24                                                                            | 3.40                                    | 1725              | 8.30                            | 0.96                                | 7.34                                    | 5.76                                                                           |      |
| 0.16   |                                                                     | He         | 5.2                | $970 \pm 70$                         | 1.71                                                                            | 3.40                                    | 2940              | 4.31                            | 0.47                                | 3.84                                    | 3.01                                                                           |      |
| 0.16   |                                                                     | He         | 5.2                | $908 \pm 85$                         | 0.92                                                                            | 3.40                                    | 5272              | 2.44                            | 0.29                                | 2.15                                    | 1.69                                                                           |      |
| 0.33   |                                                                     | He         | 10.5               | $1303 \pm 48$                        | 5.91                                                                            | 3.40                                    | 1449              | 17.06                           | 2.54                                | 14.52                                   | 11.39                                                                          |      |
| 0.33   |                                                                     | He         | 10.5               | $1220 \pm 41$                        | 4.77                                                                            | 3.40                                    | 1538              | 14.37                           | 1.90                                | 12.47                                   | 9.78                                                                           |      |
| 0.33   |                                                                     | He         | 10.5               | $1179 \pm 45$                        | 3.27                                                                            | 3.40                                    | 2449              | 10.44                           | 1.22                                | 9.22                                    | 7.23                                                                           |      |
| 0.33   |                                                                     | He         | 10.5               | $1060 \pm 64$                        | 1.72                                                                            | 3.40                                    | 3106              | 5.30                            | 0.58                                | 4.72                                    | 3.71                                                                           |      |
| 0.33   |                                                                     | He         | 10.5               | $1140 \pm 100$                       | 0.92                                                                            | 3.40                                    | 4148              | 3.37                            | 0.37                                | 3.00                                    | 2.36                                                                           |      |
| 1.6    |                                                                     | He         | 52.3               | $1660 \pm 51$                        | 5.82                                                                            | 3.40                                    | 1835              | 16.90                           | 2.23                                | 14.67                                   | 11.51                                                                          |      |
| 1.6    |                                                                     | He         | 52.3               | $1641 \pm 44$                        | 4.67                                                                            | 3.40                                    | 2399              | 14.72                           | 1.86                                | 12.86                                   | 10.08                                                                          |      |

| $T(K)$ | Total number density ( $\times 10^{18}$ molecule $\text{cm}^{-3}$ ) | Buffer gas | $^{\circ}p$ (Torr) | $k_{\text{obs}}$ ( $\text{s}^{-1}$ ) | $[(\text{CH}_3)_2\text{ClBr}]_0$ ( $\times 10^{13}$ molecule $\text{cm}^{-3}$ ) | Laser intensity ( $\text{mJ cm}^{-2}$ ) | Number of average | $\Delta A$ ( $\times 10^{-3}$ ) | Baseline shift ( $\times 10^{-3}$ ) | $\Delta A$ Criegee ( $\times 10^{-3}$ ) | $[(\text{CH}_3)_2\text{COO}]_0$ ( $\times 10^{10}$ molecule $\text{cm}^{-3}$ ) |
|--------|---------------------------------------------------------------------|------------|--------------------|--------------------------------------|---------------------------------------------------------------------------------|-----------------------------------------|-------------------|---------------------------------|-------------------------------------|-----------------------------------------|--------------------------------------------------------------------------------|
|        | 1.6                                                                 | He         | 52.3               | $1548 \pm 47$                        | 3.19                                                                            | 3.40                                    | 3666              | 10.45                           | 1.19                                | 9.26                                    | 7.26                                                                           |
|        | 1.6                                                                 | He         | 52.3               | $1454 \pm 85$                        | 1.66                                                                            | 3.40                                    | 4082              | 5.23                            | 0.58                                | 4.65                                    | 3.65                                                                           |
| 310    | 3.3                                                                 | He         | 104.8              | $2049 \pm 56$                        | 5.86                                                                            | 3.40                                    | 2745              | 19.34                           | 2.61                                | 16.73                                   | 13.12                                                                          |
|        | 3.3                                                                 | He         | 104.8              | $1929 \pm 50$                        | 4.72                                                                            | 3.40                                    | 3666              | 16.58                           | 2.15                                | 14.43                                   | 11.31                                                                          |
|        | 3.3                                                                 | He         | 104.8              | $1804 \pm 66$                        | 3.24                                                                            | 3.40                                    | 3087              | 11.60                           | 1.38                                | 10.22                                   | 8.01                                                                           |
|        | 3.3                                                                 | He         | 104.8              | $1608 \pm 86$                        | 1.69                                                                            | 3.40                                    | 4239              | 5.95                            | 0.73                                | 5.22                                    | 4.09                                                                           |
|        | 6.5                                                                 | He         | 209.5              | $1941 \pm 73$                        | 5.91                                                                            | 3.40                                    | 1659              | 17.05                           | 1.96                                | 15.09                                   | 11.83                                                                          |
|        | 6.5                                                                 | He         | 209.5              | $1942 \pm 69$                        | 4.77                                                                            | 3.40                                    | 1670              | 15.91                           | 1.76                                | 14.15                                   | 11.10                                                                          |
|        | 6.5                                                                 | He         | 209.5              | $1894 \pm 75$                        | 3.24                                                                            | 3.40                                    | 2259              | 11.44                           | 1.26                                | 10.18                                   | 7.99                                                                           |
|        | 6.5                                                                 | He         | 209.5              | $1704 \pm 106$                       | 1.70                                                                            | 3.40                                    | 3646              | 5.97                            | 0.63                                | 5.34                                    | 4.19                                                                           |
| 323    | 0.16                                                                | He         | 5.5                | $1686 \pm 82$                        | 5.86                                                                            | 3.40                                    | 1438              | 12.57                           | 1.98                                | 10.59                                   | 8.31                                                                           |
|        | 0.16                                                                | He         | 5.5                | $1634 \pm 94$                        | 4.72                                                                            | 3.40                                    | 1785              | 10.16                           | 1.47                                | 8.69                                    | 6.81                                                                           |
|        | 0.16                                                                | He         | 5.5                | $1461 \pm 88$                        | 3.23                                                                            | 3.40                                    | 2623              | 6.99                            | 0.95                                | 6.04                                    | 4.73                                                                           |
|        | 0.16                                                                | He         | 5.5                | $1536 \pm 143$                       | 1.72                                                                            | 3.40                                    | 4146              | 3.73                            | 0.46                                | 3.27                                    | 2.56                                                                           |
|        | 0.33                                                                | He         | 10.9               | $2022 \pm 73$                        | 5.91                                                                            | 3.40                                    | 2011              | 15.37                           | 2.49                                | 12.88                                   | 10.1                                                                           |
|        | 0.33                                                                | He         | 10.9               | $1977 \pm 84$                        | 4.77                                                                            | 3.40                                    | 2045              | 12.52                           | 1.95                                | 10.57                                   | 8.29                                                                           |
|        | 0.33                                                                | He         | 10.9               | $1790 \pm 82$                        | 3.27                                                                            | 3.40                                    | 3284              | 8.94                            | 1.23                                | 7.71                                    | 6.05                                                                           |
|        | 0.33                                                                | He         | 10.9               | $1757 \pm 131$                       | 1.72                                                                            | 3.40                                    | 4029              | 4.76                            | 0.59                                | 4.17                                    | 3.27                                                                           |
|        | 1.6                                                                 | He         | 54.5               | $2690 \pm 120$                       | 5.86                                                                            | 3.40                                    | 2442              | 13.90                           | 1.97                                | 11.93                                   | 9.36                                                                           |
|        | 1.6                                                                 | He         | 54.5               | $2672 \pm 121$                       | 4.77                                                                            | 3.40                                    | 3118              | 11.87                           | 1.59                                | 10.28                                   | 8.06                                                                           |
|        | 1.6                                                                 | He         | 54.5               | $2558 \pm 110$                       | 3.23                                                                            | 3.40                                    | 4692              | 8.53                            | 1.06                                | 7.47                                    | 5.86                                                                           |
|        | 1.6                                                                 | He         | 54.5               | $2461 \pm 180$                       | 1.68                                                                            | 3.40                                    | 5515              | 4.30                            | 0.51                                | 3.79                                    | 2.98                                                                           |
|        | 3.3                                                                 | He         | 109                | $3132 \pm 103$                       | 5.86                                                                            | 3.40                                    | 3190              | 17.73                           | 2.34                                | 15.39                                   | 12.1                                                                           |
|        | 3.3                                                                 | He         | 109                | $3046 \pm 112$                       | 4.77                                                                            | 3.40                                    | 3402              | 15.62                           | 2.05                                | 13.57                                   | 10.6                                                                           |
|        | 3.3                                                                 | He         | 109                | $2877 \pm 143$                       | 3.24                                                                            | 3.40                                    | 2615              | 10.69                           | 1.37                                | 9.32                                    | 7.31                                                                           |
|        | 3.3                                                                 | He         | 109                | $2852 \pm 202$                       | 1.69                                                                            | 3.40                                    | 5575              | 5.58                            | 0.67                                | 4.91                                    | 3.85                                                                           |



| $T(K)$ | Total number density ( $\times 10^{18}$ molecule $\text{cm}^{-3}$ ) | Buffer gas | $^o p$ (Torr) | $k_{\text{obs}}$ ( $\text{s}^{-1}$ ) | $[(\text{CH}_3)_2\text{ClBr}]_0$ ( $\times 10^{13}$ molecule $\text{cm}^{-3}$ ) | Laser intensity ( $\text{mJ cm}^{-2}$ ) | Number of average | $\Delta A$ ( $\times 10^{-3}$ ) | Baseline shift ( $\times 10^{-3}$ ) | $\Delta A$ Criegee ( $\times 10^{-3}$ ) | $[(\text{CH}_3)_2\text{COO}]_0$ ( $\times 10^{10}$ molecule $\text{cm}^{-3}$ ) |
|--------|---------------------------------------------------------------------|------------|---------------|--------------------------------------|---------------------------------------------------------------------------------|-----------------------------------------|-------------------|---------------------------------|-------------------------------------|-----------------------------------------|--------------------------------------------------------------------------------|
| 323    | 6.5                                                                 | He         | 218           | $3380 \pm 116$                       | 5.96                                                                            | 3.40                                    | 2556              | 17.96                           | 2.11                                | 15.85                                   | 12.4                                                                           |
|        | 6.5                                                                 | He         | 218           | $3290 \pm 117$                       | 4.77                                                                            | 3.40                                    | 3531              | 15.16                           | 1.73                                | 13.43                                   | 10.5                                                                           |
|        | 6.5                                                                 | He         | 218           | $3157 \pm 148$                       | 3.27                                                                            | 3.40                                    | 4912              | 10.83                           | 1.25                                | 9.58                                    | 7.51                                                                           |
|        | 6.5                                                                 | He         | 218           | $3086 \pm 251$                       | 1.70                                                                            | 3.40                                    | 4344              | 5.76                            | 0.65                                | 5.11                                    | 4.01                                                                           |
| 330    | 0.16                                                                | He         | 5.6           | $1969 \pm 86$                        | 5.82                                                                            | 3.40                                    | 3017              | 10.74                           | 1.77                                | 8.97                                    | 7.04                                                                           |
|        | 0.16                                                                | He         | 5.6           | $1894 \pm 87$                        | 4.72                                                                            | 3.40                                    | 3249              | 9.00                            | 1.36                                | 7.64                                    | 5.99                                                                           |
|        | 0.16                                                                | He         | 5.6           | $1805 \pm 109$                       | 3.24                                                                            | 3.40                                    | 3330              | 6.28                            | 0.83                                | 5.45                                    | 4.28                                                                           |
|        | 0.16                                                                | He         | 5.6           | $1692 \pm 168$                       | 1.72                                                                            | 3.40                                    | 4564              | 3.20                            | 0.40                                | 2.80                                    | 2.19                                                                           |
|        | 0.33                                                                | He         | 11.2          | $2613 \pm 91$                        | 5.91                                                                            | 3.40                                    | 2945              | 13.20                           | 2.27                                | 10.93                                   | 8.57                                                                           |
|        | 0.33                                                                | He         | 11.2          | $2461 \pm 110$                       | 4.77                                                                            | 3.40                                    | 3059              | 11.15                           | 1.82                                | 9.33                                    | 7.32                                                                           |
|        | 0.33                                                                | He         | 11.2          | $2365 \pm 119$                       | 3.26                                                                            | 3.40                                    | 4387              | 7.99                            | 1.14                                | 6.85                                    | 5.37                                                                           |
|        | 0.33                                                                | He         | 11.2          | $2240 \pm 198$                       | 1.71                                                                            | 3.40                                    | 5029              | 3.93                            | 0.58                                | 3.35                                    | 2.63                                                                           |
|        | 1.6                                                                 | He         | 55.7          | $3698 \pm 198$                       | 5.86                                                                            | 3.40                                    | 2176              | 12.99                           | 1.94                                | 11.05                                   | 8.67                                                                           |
|        | 1.6                                                                 | He         | 55.7          | $3595 \pm 187$                       | 4.72                                                                            | 3.40                                    | 3371              | 10.828                          | 1.61                                | 9.21                                    | 7.22                                                                           |
|        | 1.6                                                                 | He         | 55.7          | $3567 \pm 195$                       | 3.22                                                                            | 3.40                                    | 4807              | 7.52                            | 0.99                                | 6.53                                    | 5.12                                                                           |
|        | 1.6                                                                 | He         | 55.7          | $3444 \pm 363$                       | 1.67                                                                            | 3.40                                    | 5380              | 3.93                            | 0.50                                | 3.43                                    | 2.69                                                                           |
|        | 3.3                                                                 | He         | 111.5         | $4066 \pm 143$                       | 5.91                                                                            | 3.40                                    | 3667              | 16.10                           | 2.16                                | 13.94                                   | 10.94                                                                          |
|        | 3.3                                                                 | He         | 111.5         | $3918 \pm 178$                       | 4.77                                                                            | 3.40                                    | 4257              | 13.48                           | 1.73                                | 11.75                                   | 9.21                                                                           |
|        | 3.3                                                                 | He         | 111.5         | $3770 \pm 254$                       | 3.23                                                                            | 3.40                                    | 3650              | 9.47                            | 1.16                                | 8.31                                    | 6.52                                                                           |
|        | 3.3                                                                 | He         | 111.5         | $3825 \pm 320$                       | 1.69                                                                            | 3.40                                    | 5031              | 4.83                            | 0.53                                | 4.30                                    | 3.37                                                                           |
| 340    | 0.16                                                                | He         | 5.8           | $2708 \pm 147$                       | 5.86                                                                            | 3.40                                    | 4419              | 8.63                            | 1.47                                | 7.16                                    | 5.62                                                                           |
|        | 0.16                                                                | He         | 5.8           | $2501 \pm 148$                       | 4.72                                                                            | 3.40                                    | 3807              | 7.07                            | 1.13                                | 5.94                                    | 4.66                                                                           |
|        | 0.16                                                                | He         | 5.8           | $2333 \pm 163$                       | 3.23                                                                            | 3.40                                    | 5303              | 5.05                            | 0.72                                | 4.33                                    | 3.40                                                                           |
|        | 0.16                                                                | He         | 5.8           | $1963 \pm 230$                       | 1.73                                                                            | 3.40                                    | 5739              | 2.54                            | 0.35                                | 2.19                                    | 1.71                                                                           |
|        | 0.33                                                                | He         | 11.7          | $3174 \pm 193$                       | 5.96                                                                            | 3.40                                    | 3170              | 9.86                            | 1.73                                | 8.13                                    | 6.38                                                                           |
|        | 0.33                                                                | He         | 11.7          | $3161 \pm 187$                       | 4.77                                                                            | 3.40                                    | 3617              | 8.33                            | 1.29                                | 7.04                                    | 5.52                                                                           |

| <i>T</i> (K) | Total number density ( $\times 10^{18}$ molecule $\text{cm}^{-3}$ ) | Buffer gas | $^{\circ}p$ (Torr) | $k_{\text{obs}}$ ( $\text{s}^{-1}$ ) | $[(\text{CH}_3)_2\text{ClBr}]_0$ ( $\times 10^{13}$ molecule $\text{cm}^{-3}$ ) | Laser intensity ( $\text{mJ cm}^{-2}$ ) | Number of average | $\Delta A$ ( $\times 10^{-3}$ ) | Baseline shift ( $\times 10^{-3}$ ) | $\Delta A$ Criegee ( $\times 10^{-3}$ ) | $[(\text{CH}_3)_2\text{COO}]_0$ ( $\times 10^{10}$ molecule $\text{cm}^{-3}$ ) |
|--------------|---------------------------------------------------------------------|------------|--------------------|--------------------------------------|---------------------------------------------------------------------------------|-----------------------------------------|-------------------|---------------------------------|-------------------------------------|-----------------------------------------|--------------------------------------------------------------------------------|
|              | 0.33                                                                | He         | 11.7               | $2902 \pm 206$                       | 3.26                                                                            | 3.40                                    | 5401              | 5.78                            | 0.80                                | 4.98                                    | 3.91                                                                           |
|              | 0.33                                                                | He         | 11.7               | $3063 \pm 345$                       | 1.70                                                                            | 3.40                                    | 7015              | 3.26                            | 0.42                                | 2.84                                    | 2.23                                                                           |
| 340          | 1.6                                                                 | He         | 57.5               | $5963 \pm 313$                       | 5.86                                                                            | 3.40                                    | 4432              | 12.41                           | 2.12                                | 10.29                                   | 8.07                                                                           |
|              | 1.6                                                                 | He         | 57.5               | $5573 \pm 361$                       | 4.72                                                                            | 3.40                                    | 4988              | 10.47                           | 1.64                                | 8.83                                    | 6.92                                                                           |
|              | 1.6                                                                 | He         | 57.5               | $5129 \pm 369$                       | 3.21                                                                            | 3.40                                    | 4176              | 7.14                            | 1.07                                | 6.07                                    | 4.76                                                                           |
|              | 1.6                                                                 | He         | 57.5               | $4958 \pm 606$                       | 1.67                                                                            | 3.40                                    | 5920              | 3.71                            | 0.54                                | 3.17                                    | 2.49                                                                           |

<sup>a</sup>The fixed concentration of  $\text{O}_2$  was  $\sim 4.0 \times 10^{16}$  molecule  $\text{cm}^{-3}$  for all measurements.

## UV spectra and absorption cross sections

Figure S6 shows measured “raw” cross section of acetone oxide  $(\text{CH}_3)_2\text{COO}$  with contribution from iodine oxide IO at longer wavelengths, obtained from the measured absorbance shown in Figure S5 using  $[(\text{CH}_3)_2\text{COO}] = 5.5 \times 10^{10} \text{ molecule cm}^{-3}$  (determined at 340 nm), and known iodine oxide IO cross section. The concentration of acetone oxide,  $[(\text{CH}_3)_2\text{COO}]$ , was calculated using equation (S3) with the measured absorbance and using absorption cross section data from Huang et al.<sup>8</sup> In the recording of the UV spectrum about 3500 measurements were averaged. Figure S6 shows the distinct peaks of IO and consequently absorption cross section of IO from literature was used to determine the  $[\text{IO}] = 2 \times 10^{10} \text{ molecule cm}^{-3}$ .<sup>9</sup>

Figure S7 shows the cross section of  $(\text{CH}_3)_2\text{COO}$  determined in this work after subtraction of the contribution of IO to the spectrum. Note that the  $(\text{CH}_3)_2\text{COO}$  concentration used for recording the spectra is about an order of magnitude bigger than the concentrations typically used for the kinetic measurements.

In figure S8, the transmission of the optical cavity mirrors is shown below the “raw” cross section of  $(\text{CH}_3)_2\text{COO}$  from figure S6.

Figure S9 shows comparison between the  $\text{CH}_2\text{OO}$  cross sections measured in this work ( $\text{CH}_2\text{IBr} / 213 \text{ nm} / \text{O}_2 / \text{N}_2$  environment) to those reported earlier by us and Ting et al.<sup>3,10</sup> The differences between the cross sections recorded by us are caused by different set of mirrors used for the optical cavity for the two measurements.

Figure S10 shows a comparison of the cross sections of acetone oxide determined in this work using 2,2-bromoiodomethane  $(\text{CH}_3)_2\text{CIBr}$  ( $(\text{CH}_3)_2\text{CIBr} / 213 \text{ nm} / \text{O}_2 / \text{N}_2$  environment) and 2,2-diiodopropane  $(\text{CH}_3)_2\text{Cl}_2$  ( $(\text{CH}_3)_2\text{Cl}_2 / 266 \text{ nm} / \text{O}_2 / \text{N}_2$  environment). The differences between the two are due to changes made to the experimental setup to accommodate using the different precursor molecules (i.e, changing the wavelength of the laser and adjusting the mirror system for the absorption spectroscopy).

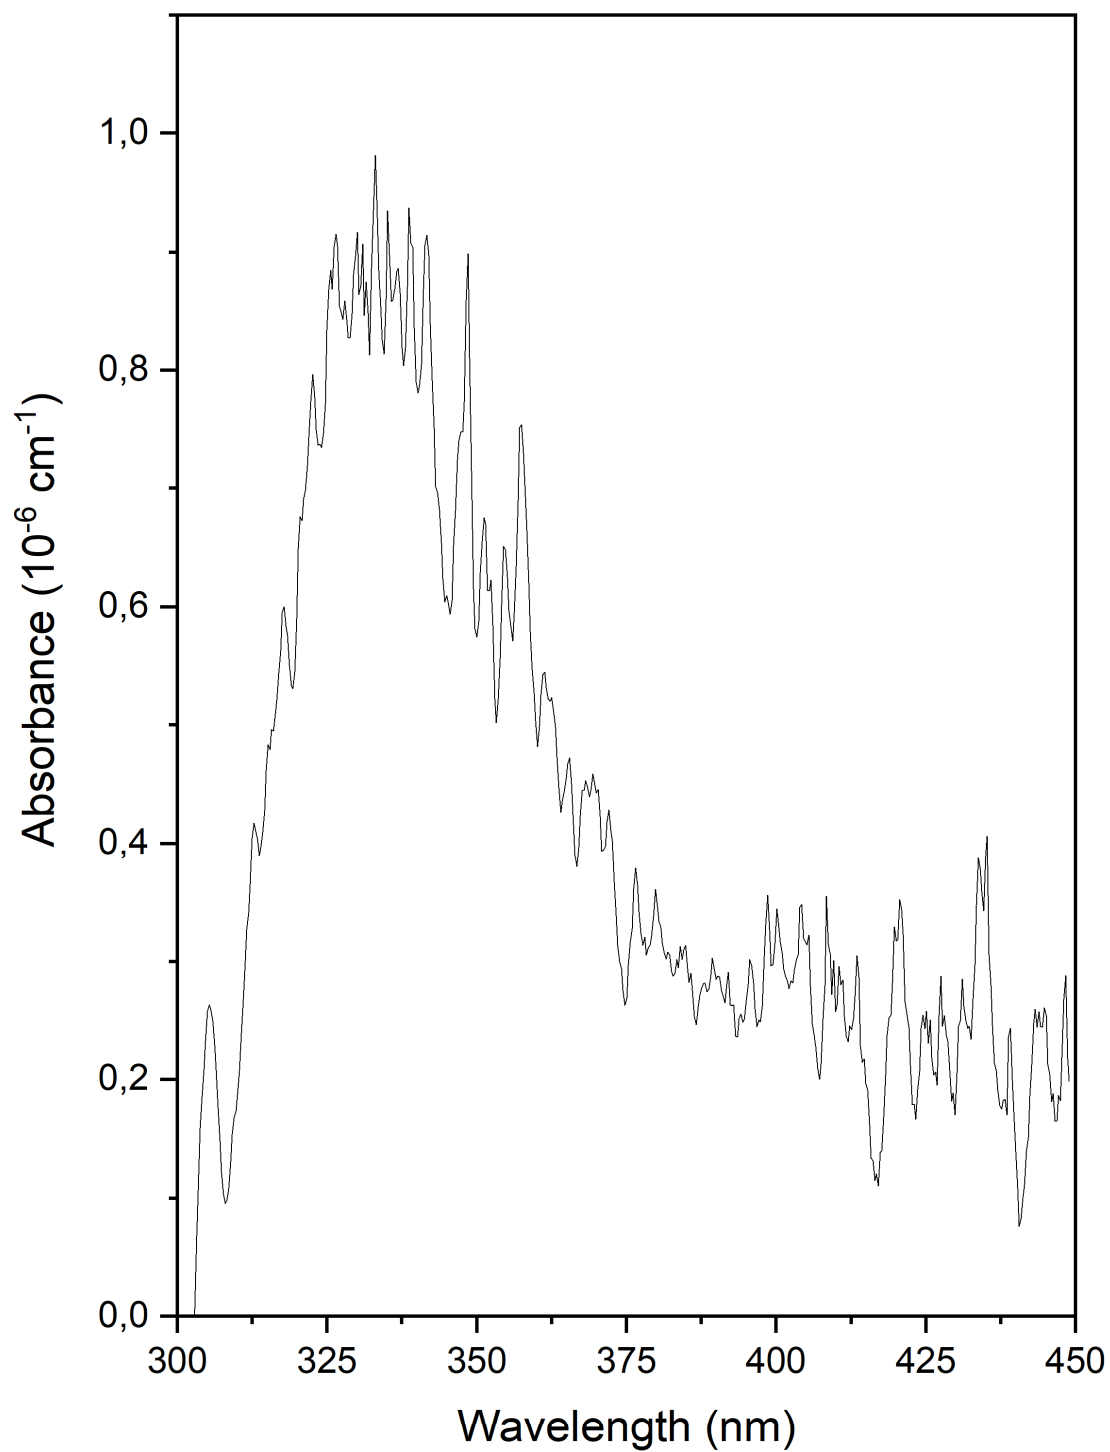

Figure S5. Measured absorbance between 300 and 450 nm wavelength region in  $(\text{CH}_3)_2\text{ClBr} / 213 \text{ nm} / \text{O}_2 / \text{N}_2$  environment. A dip around 347 nm and the sharp decline at the short wavelengths, *i.e.*  $\leq 320 \text{ nm}$ , are due to poor light transmission through the optical cavity mirrors. The spectrum was recorded at 296 K temperature and 10 torr pressure. The spectrum was averaged over  $t = 0 - 1 \text{ ms}$ .

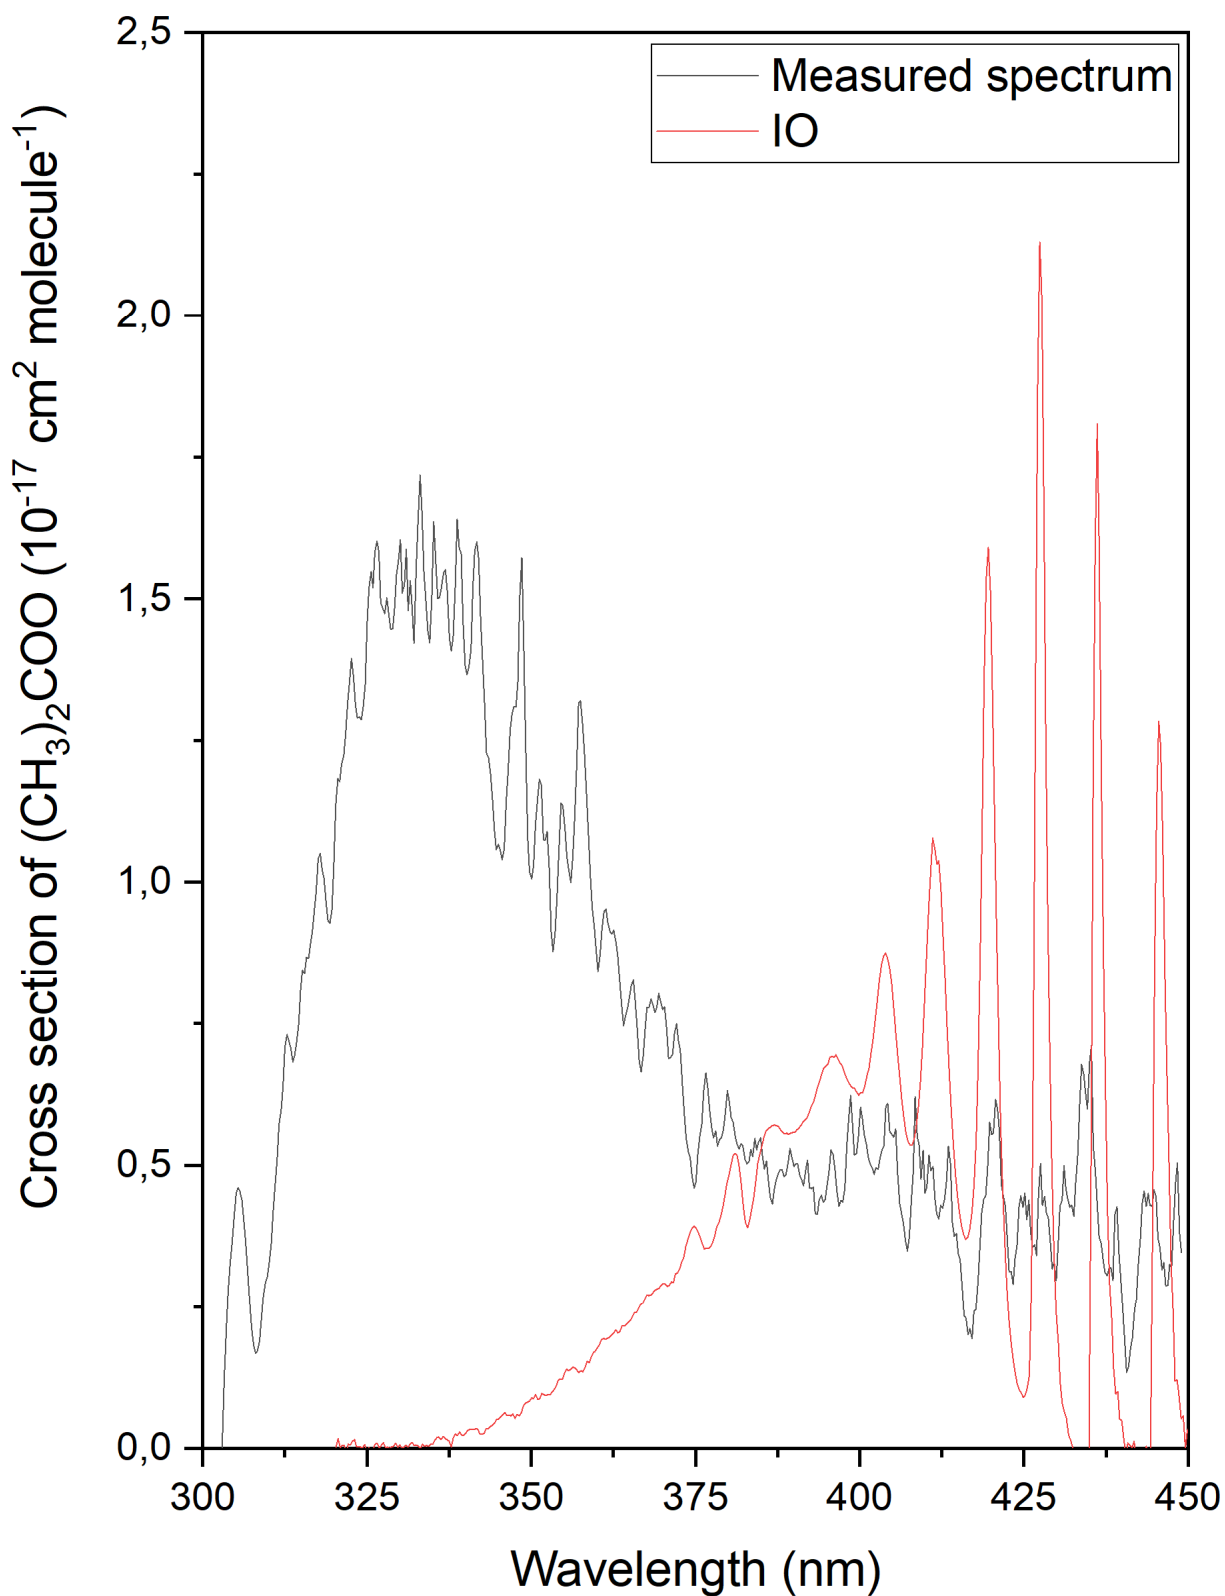

Figure S6. Measured “raw” cross section of acetone oxide  $(\text{CH}_3)_2\text{COO}$  (black), with contribution from iodine oxide IO at longer wavelengths, obtained from the measured absorbance shown in Figure S5 using  $[(\text{CH}_3)_2\text{COO}] = 5.5 \times 10^{10}$  molecule  $\text{cm}^{-3}$  (determined at 340 nm), and iodine oxide IO (red) cross section.<sup>9</sup> The spectrum was recorded at 296 K temperature and 10 torr pressure in  $(\text{CH}_3)_2\text{ClBr} / 213 \text{ nm} / \text{O}_2 / \text{N}_2$  environment. The spectrum was averaged over  $t = 0 - 1$  ms.

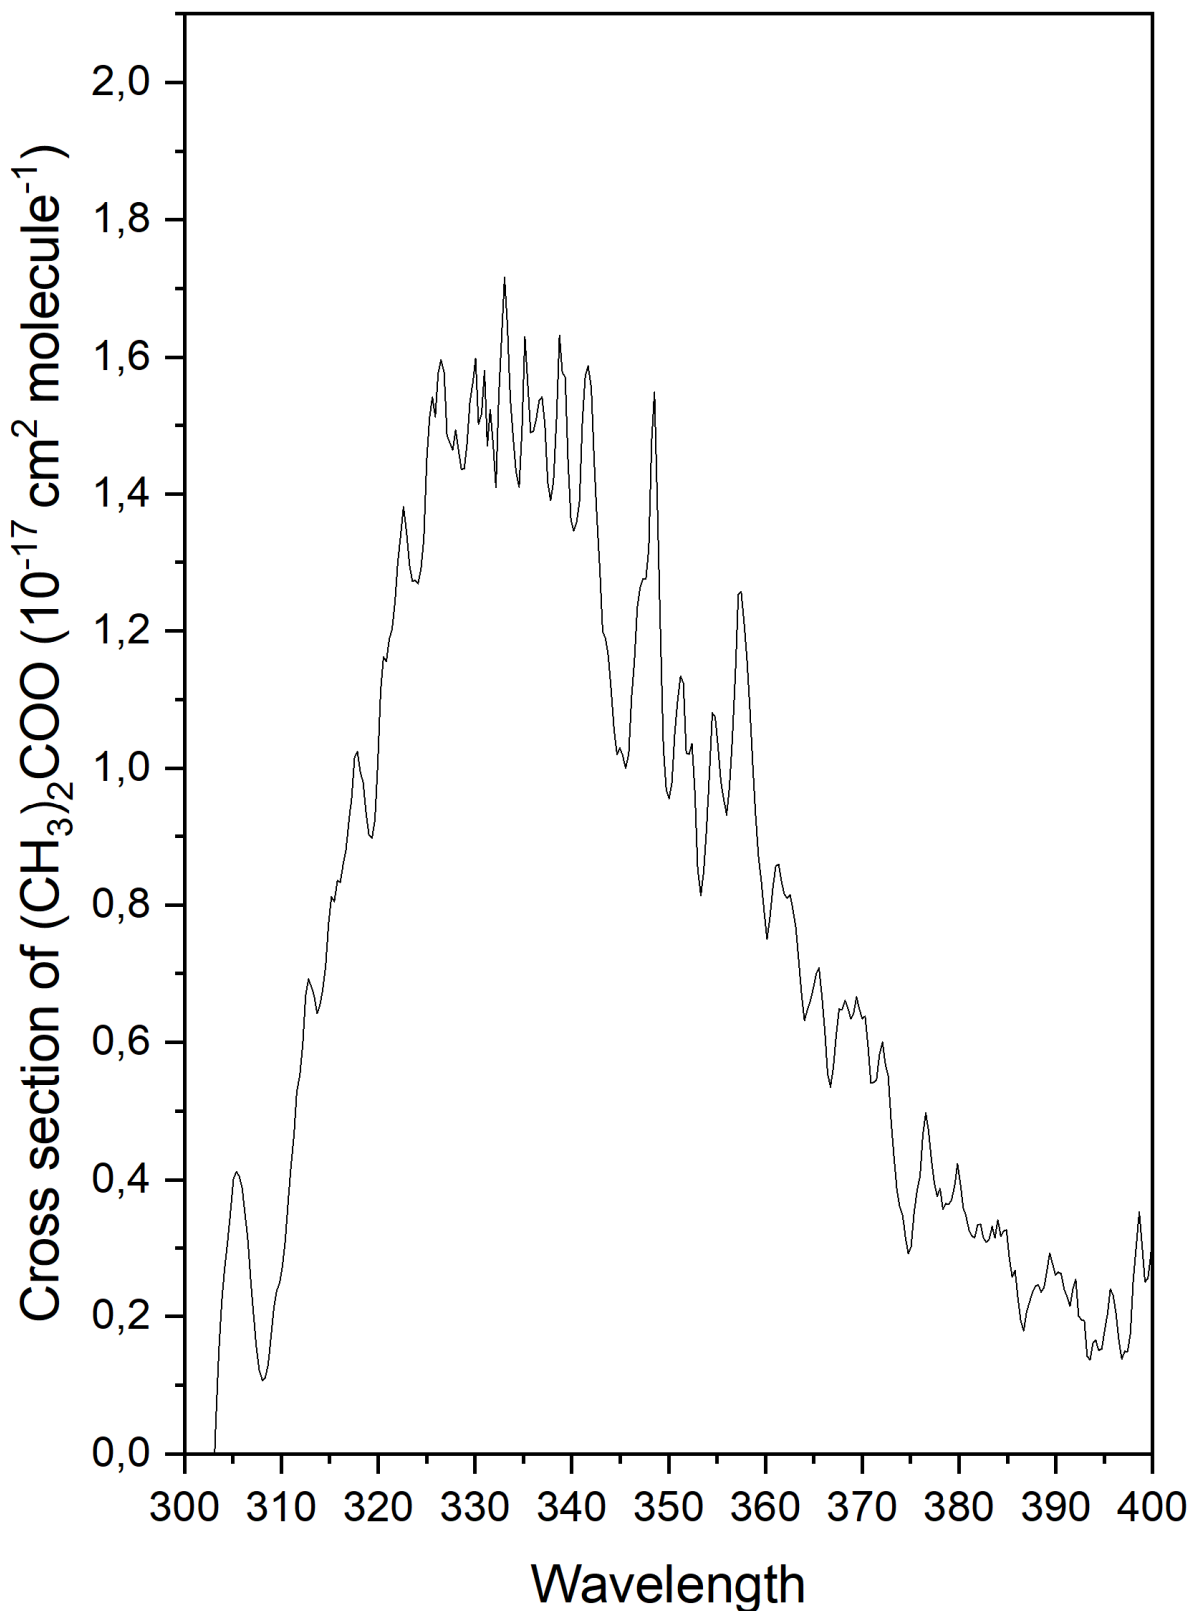

Figure S7. The measured cross section of acetone oxide  $(\text{CH}_3)_2\text{COO}$  obtained from absorption spectrum shown in Figure S5 after subtracting the absorbance of iodine oxide IO contribution. The concentrations used for the calculations were  $5.5 \times 10^{10}$  molecule  $\text{cm}^{-3}$  for  $(\text{CH}_3)_2\text{COO}$  and  $2 \times 10^{10}$  molecule  $\text{cm}^{-3}$  for IO. The IO concentration was calculated from the IO peaks centered at 419, 427, and 436 nm.<sup>9</sup> The spectrum was recorded at 296 K temperature and 10 torr pressure in  $(\text{CH}_3)_2\text{ClBr} / 213 \text{ nm} / \text{O}_2 / \text{N}_2$  environment.

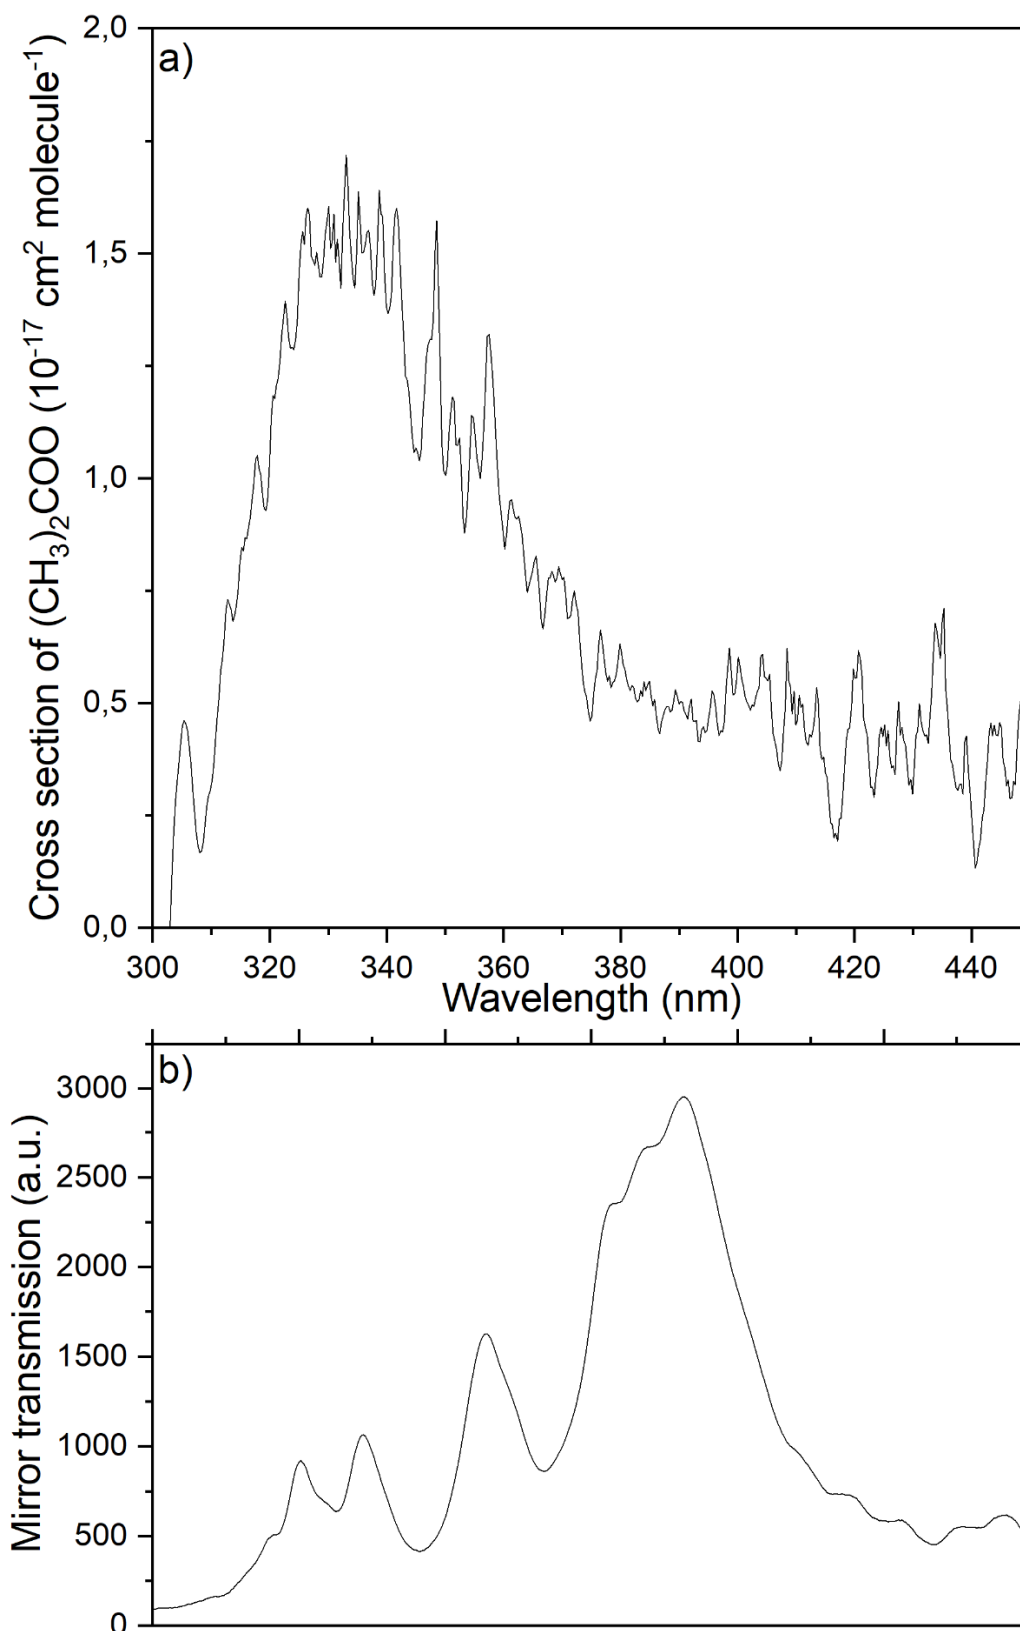

Figure S8. Measured “raw” cross section of  $(\text{CH}_3)_2\text{COO}$  with contribution from iodine oxide IO at longer wavelengths (a, from Figure S6 where  $[(\text{CH}_3)_2\text{COO}] = 5.5 \times 10^{10} \text{ molecule cm}^{-3}$ ) and the transmission of the mirrors used for the optical cavity (b) from 300 to 450 nm wavelength. A dip around 347 nm and the sharp decline at the short wavelength end of the spectrum are due to poor transmission of light trough the cavity mirrors. The spectrum was recorded at 296 K temperature and 10 torr pressure in  $(\text{CH}_3)_2\text{ClBr} / 213 \text{ nm} / \text{O}_2 / \text{N}_2$  environment. The spectrum was averaged over  $t = 0 - 1 \text{ ms}$  after photolysis initiation.

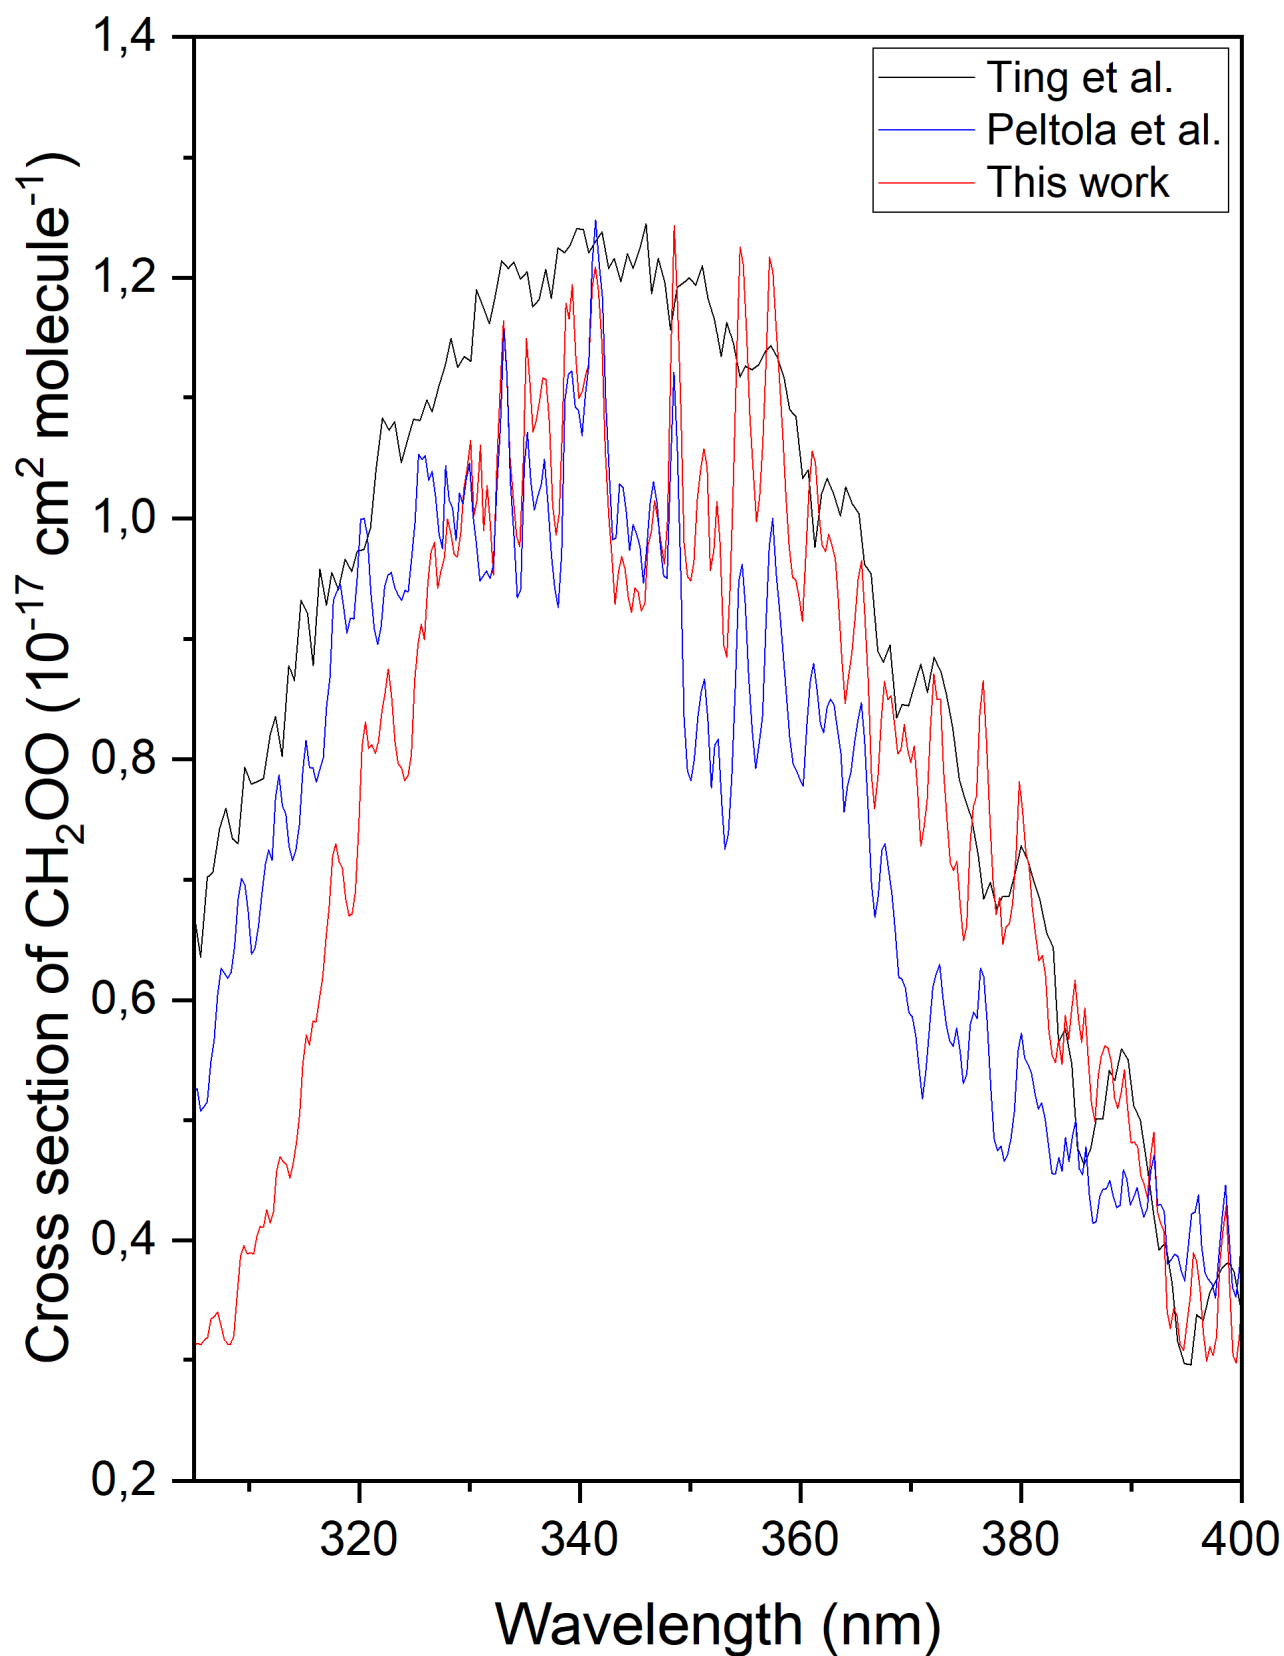

Figure S9. A comparison of the CH<sub>2</sub>OO spectra measured during this work to those reported earlier by our group and Ting et al.<sup>3,10</sup> The differences between the spectra measured by our group before<sup>3</sup> and in this work are caused by different set of mirrors used to construct optical cavity for the two measurements. The spectrum of this work was recorded at 296 K temperature and 10 torr pressure in CH<sub>2</sub>IBr / 213 nm / O<sub>2</sub> / N<sub>2</sub> environment, where [CH<sub>2</sub>OO] was 3.1 × 10<sup>11</sup> molecule cm<sup>-3</sup>. The spectrum was averaged over  $t = 0 - 1$  ms.



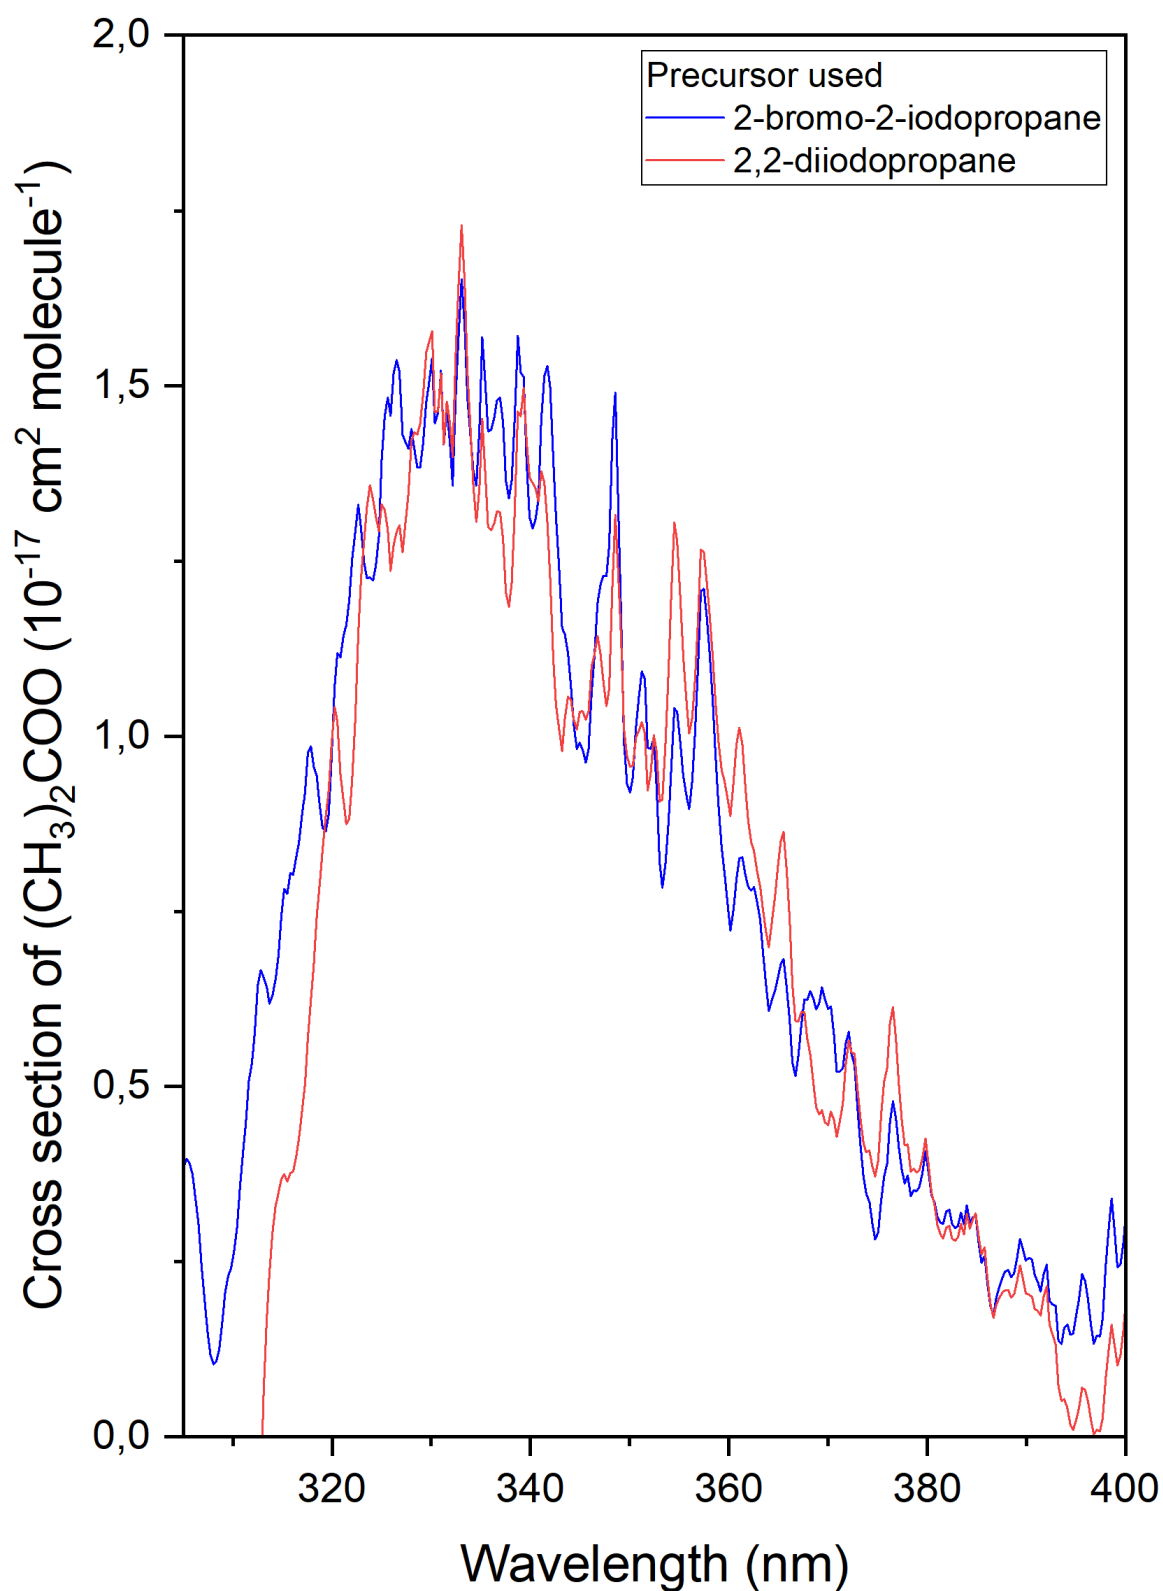

Figure S10. A comparison of the absorption cross sections of acetone oxide determined in this work using 2,2-bromiodopropane ( $(\text{CH}_3)_2\text{CIBr}$  / 213 nm /  $\text{O}_2$  /  $\text{N}_2$  environment) and 2,2-diiodopropane ( $(\text{CH}_3)_2\text{CI}_2$  / 266 nm /  $\text{O}_2$  /  $\text{N}_2$  environment). Small differences between the two determinations are likely due to changes made to the experimental setup to accommodate the different precursor molecules (i.e, changing the wavelength of the laser and adjusting the mirror system for the measurements). The spectra were recorded at 296 K temperature and 10 torr pressure, the  $(\text{CH}_3)_2\text{COO}$  concentrations were  $5.5 \times 10^{10}$  molecule  $\text{cm}^{-3}$  for  $(\text{CH}_3)_2\text{CIBr}$  and  $5.4 \times 10^{10}$  molecule  $\text{cm}^{-3}$  for  $(\text{CH}_3)_2\text{CI}_2$ . The spectra were averaged over  $t = 0 - 1$  ms.

Comparison with the previous  $k_{\text{uni}}$  kinetic simulations and current branching ratios of the methyl-vinyl hydroperoxide and methyl-vinoy + OH products

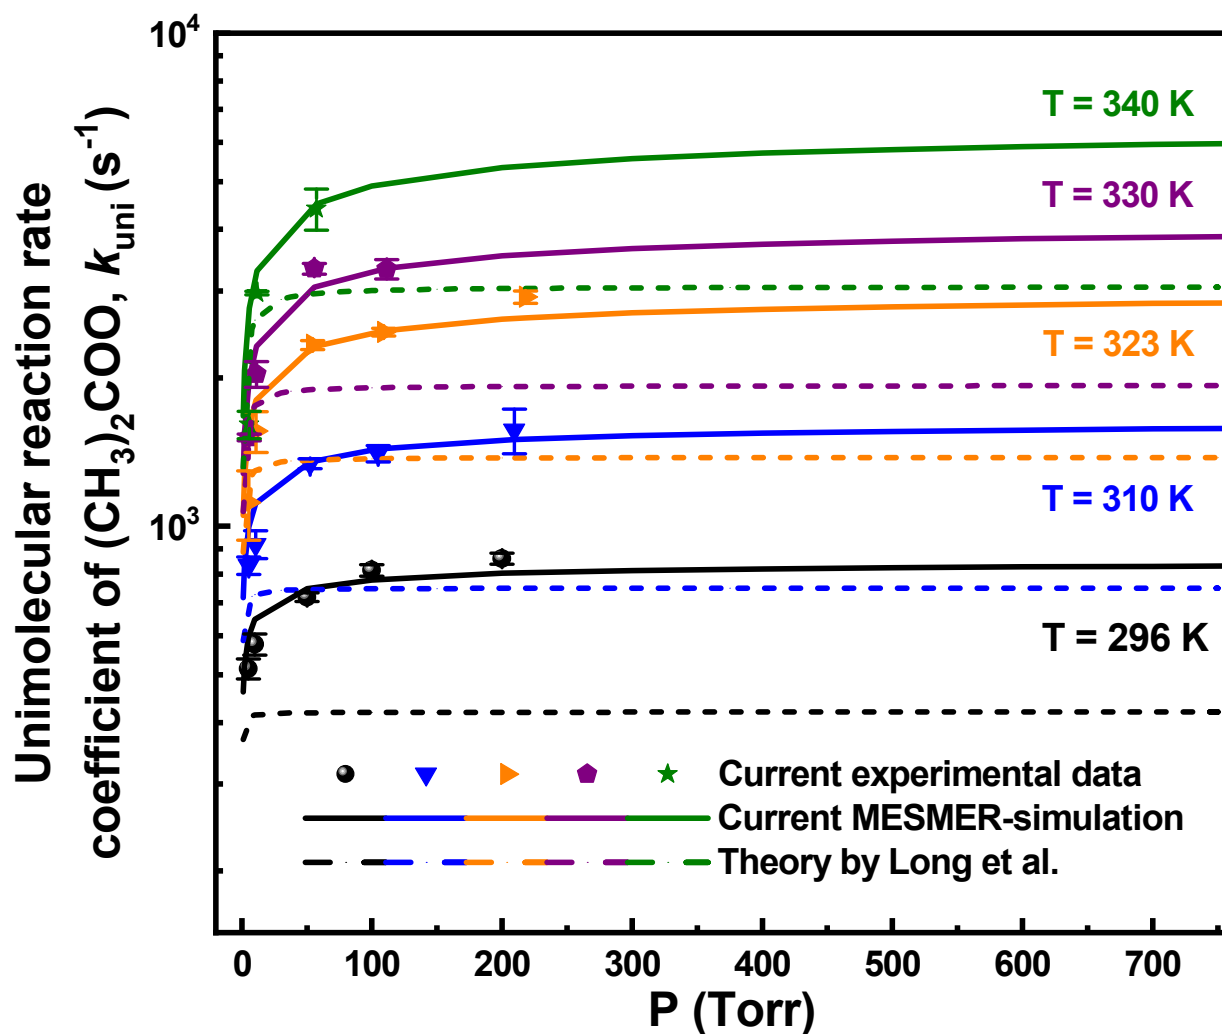

Figure S11. A comparison of the high-pressure limiting rate coefficients between the present work and that of Long et al.<sup>11</sup> The points are the experimental data whereas solid lines are the MESMER simulated results. The dashed lines are taken from ref.<sup>8</sup>

**Table S3** Branching ratios (BRs) at 1 sec (in %) after reaction initiation based on the PES with only TS1 and TS2 channel. Values in parentheses are BRs at 500 secs.

| T (K)                   | P (Torr) | BR(Methyl-VHP) | BR(Methyl-vinoxy + OH) |
|-------------------------|----------|----------------|------------------------|
| He bath gas             |          |                |                        |
| 296                     | 5.0      | 33.4 (0.0)     | 66.6 (100.0)           |
|                         | 10.0     | 39.0 (0.0)     | 61.0 (100.0)           |
|                         | 50.0     | 55.8 (0.0)     | 44.2 (100.0)           |
|                         | 100.0    | 63.9 (0.0)     | 36.1 (100.0)           |
|                         | 200.0    | 72.0 (0.0)     | 28.0 (100.0)           |
| 310                     | 5.23     | 24.7 (0.0)     | 75.3 (100.0)           |
|                         | 10.47    | 28.9 (0.0)     | 71.1 (100.0)           |
|                         | 52.3     | 42.1 (0.0)     | 57.9 (100.0)           |
|                         | 104.8    | 49.1 (0.0)     | 50.9 (100.0)           |
|                         | 209.5    | 56.4 (0.0)     | 43.6 (100.0)           |
| 323                     | 5.45     | 15.6 (0.0)     | 84.4 (100.0)           |
|                         | 10.9     | 17.5 (0.0)     | 82.5 (100.0)           |
|                         | 54.5     | 23.9 (0.0)     | 76.1 (100.0)           |
|                         | 109      | 27.6 (0.0)     | 72.4 (100.0)           |
| 330                     | 5.57     | 10.3 (0.0)     | 89.7 (100.0)           |
|                         | 11.15    | 10.9 (0.0)     | 89.1 (100.0)           |
|                         | 55.6     | 13.2 (0.0)     | 86.8 (100.0)           |
|                         | 111.5    | 14.8 (0.0)     | 85.2 (100.0)           |
| 340                     | 5.75     | 3.8 (0.0)      | 96.2 (100.0)           |
|                         | 11.74    | 3.3 (0.0)      | 96.7 (100.0)           |
|                         | 57.5     | 2.8 (0.0)      | 97.2 (100.0)           |
| N <sub>2</sub> bath gas |          |                |                        |
| 243                     | 4.1      | 79.8 (78.0)    | 20.2 (22.0)            |
|                         | 8.2      | 85.1 (83.2)    | 14.9 (16.8)            |
|                         | 41.0     | 94.4 (92.1)    | 5.6 (7.9)              |
|                         | 82.0     | 96.8 (94.4)    | 3.2 (5.6)              |
| 253                     | 4.26     | 73.1 (66.1)    | 26.9 (33.9)            |
|                         | 8.53     | 79.4 (71.4)    | 20.6 (28.6)            |
|                         | 42.6     | 91.3 (81.5)    | 8.7 (18.5)             |
|                         | 85.3     | 94.7 (84.4)    | 5.3 (15.6)             |
| 263                     | 4.43     | 66.0 (44.1)    | 34.0 (55.9)            |
|                         | 8.87     | 73.1 (47.5)    | 26.9 (52.5)            |
|                         | 44.3     | 87.5 (55.0)    | 12.5 (45.0)            |
|                         | 88.7     | 92.0 (57.4)    | 8.0 (42.6)             |
| 273                     | 4.6      | 58.8 (13.7)    | 41.2 (86.3)            |
|                         | 9.21     | 66.3 (13.8)    | 33.7 (86.2)            |
|                         | 46.0     | 82.9 (14.9)    | 17.1 (85.1)            |
|                         | 92.1     | 88.5 (15.4)    | 11.5 (84.6)            |
| 283                     | 4.78     | 51.7 (0.4)     | 48.3 (99.6)            |

|     |       |            |              |
|-----|-------|------------|--------------|
|     | 9.55  | 59.3 (0.3) | 40.7 (99.7)  |
|     | 47.8  | 77.5 (0.2) | 22.5 (99.8)  |
|     | 95.5  | 84.2 (0.2) | 15.8 (99.8)  |
| 296 | 5.0   | 42.4 (0.0) | 57.6 (100.0) |
|     | 10.0  | 49.6 (0.0) | 50.4 (100.0) |
|     | 50.0  | 68.4 (0.0) | 31.6 (100.0) |
|     | 200.0 | 82.5 (0.0) | 17.5 (100.0) |
| 310 | 10.47 | 36.8 (0.0) | 63.2 (100.0) |
|     | 52.3  | 52.8 (0.0) | 47.2 (100.0) |

## References

- (1) Chang, Y.; Chang, C.; Takahashi, K. Absolute UV absorption cross sections of dimethyl substituted Criegee intermediate (CH<sub>3</sub>)<sub>2</sub>COO, *Chem. Phys. Lett.* **2016**, *653*, 155-160.
- (2) Chhantyal-Pun, R.; McGillen, M. R.; Beames, J. M.; Khan, M. A. H.; Percival, C. J.; Shallcross, D. E.; Orr-Ewing, A. J. Temperature-Depence of the Rates of Reaction of Trifluoroacetic acid with Criegee Intermediates, *Angew. Chem. Int. Ed. Eng.* **2017**, *56*, 9044-9047.
- (3) Peltola, J.; Seal, P.; Inkilä, A.; Eskola, A. J. Time-resolved, broadband UV-absorption spectrometry measurements of Criegee intermediate kinetics using a new photolytic precursor: Unimolecular decomposition of CH<sub>2</sub>OO and its reaction with formic acid, *Phys. Chem. Chem. Phys.* **2020**, *22*, 11797-11808.
- (4) Chhantyal-Pun, R.; Welz, O.; Savee, J. D.; Eskola, A. J.; Lee, E. P.; Blacker, L.; Hill, H. R.; Ashcroft, M.; Khan, M. A. H.; Lloyd-Jones, G. C. Direct measurements of unimolecular and bimolecular reaction kinetics of the Criegee intermediate (CH<sub>3</sub>)<sub>2</sub>COO, *J. Phys. Chem. A* **2017**, *121*, 4-15.
- (5) Smith, M. C.; Chao, W.; Takahashi, K.; Boering, K. A.; Lin, J. J. Unimolecular Decomposition Rate of the Criegee Intermediate (CH<sub>3</sub>)<sub>2</sub>COO Measured Directly with UV Absorption Spectroscopy, *J. Phys. Chem. A* **2016**, *120*, 4789-4798.
- (6) Stone, D.; Au, K.; Sime, S.; Medeiros, D.,J.; Blitz, M.; Seakins, P. W.; Decker, Z.; Sheps, L. Unimolecular decomposition kinetics of the stabilised Criegee intermediates CH<sub>2</sub>OO and CD<sub>2</sub>OO, *Phys. Chem. Chem. Phys.* **2018**, *20*, 24940-24954.
- (7) Tang, M. J.; Shiraiwa, M.; Pöschl, U.; Cox, R. A.; Kalberer, M. Compilation and evaluation of gas phase diffusion coefficients of reactive trace gases in the atmosphere: Volume 2. Diffusivities of organic compounds, pressure-normalized mean free paths, and average Knudsen numbers for gas uptake calculations, *Atmos. Chem. Phys.* **2015**, *15*, 5585-5598.
- (8) Huang, H.-L.; Chao, W.; Lin, J. J. Kinetics of a Criegee intermediate that would survive high humidity and may oxidize atmospheric SO<sub>2</sub>, *MProc. Natl. Acad. Sci. U.S.A*, **2015**, *112*, 10857-10862.
- (9) P. Spietz, J.C.; Gomez Martin, G; Burrows, J. P. Spectroscopic studies of the I<sub>2</sub>/O<sub>3</sub> photochemistry. Part 2. Improved spectra of iodine oxides and analysis of the IO absorption spectrum, *J. Photochem. Photobiol. A: Chem.*, **2005**, *176*, 50-67.
- (10) Ting, W; Chen, Y; Chao, W; Smith, M. C. The UV absorption spectrum of the simplest Criegee intermediate CH<sub>2</sub>OO, *Phys. Chem. Chem. Phys*, **2014**, *16*, 10438-10443.
- (11) Long, B.; Bao, J. L.; Truhlar, D. G. Unimolecular reaction of acetone oxide and its reaction with water in the atmosphere *Proc. Natl. Acad. Sci. U. S. A.* **2018**, *115*, 6135-6140.

## MESMER input files

### He bath gas

```
<?xml version="1.0" encoding="utf-8" ?>
<?xml-stylesheet type='text/xsl' href='../mesmer2.xsl' media='other'?>
<?xml-stylesheet type='text/xsl' href='../mesmer1.xsl' media='screen'?>
<me:mesmer xmlns="http://www.xml-cml.org/schema"
xmlns:me="http://www.chem.leeds.ac.uk/mesmer" xmlns:xsi="http://www.w3.org/2001/XMLSchema-
instance">
  <me:title>Project name</me:title>
  <moleculeList convention="">

  <molecule id="He">
    <atomArray>
      <atom elementType="He" />
    </atomArray>
    <propertyList>
      <property dictRef="me:epsilon">
        <scalar>10.2</scalar>
      </property>
      <property dictRef="me:sigma">
        <scalar>2.55</scalar>
      </property>
      <property dictRef="me:MW">
        <scalar units="amu">4.0</scalar>
      </property>
    </propertyList>
    <metadata name="copiedFrom" content="../librarymols.xml" timestamp="20200118_112216" />
  </molecule>

  <molecule id="OH" spinMultiplicity="2">
```

```

<atomArray>
  <atom id="a1" elementType="O" spinMultiplicity="2" x3="0.772188" y3="-1.028683" z3="-1.079052"
/>
  <atom id="a2" elementType="H" x3="1.058651" y3="-1.784301" z3="-1.627078" />
</atomArray>
<bondArray>
  <bond atomRefs2="a2 a1" order="1" />
</bondArray>
<propertyList>
  <property title="program">
    <scalar>Gaussian 16, Revision C.01</scalar>
  </property>
  <property title="basis">
    <scalar>def2TZVP (5D, 7F)</scalar>
  </property>
  <property title="method">
    <scalar>mn15</scalar>
  </property>
  <property title="File Format">
    <scalar>g03</scalar>
  </property>
  <property title="Energy" dictRef="me:ZPE">
    <scalar units="kJ/mol" >0</scalar>
  </property>
  <property title="SpinMultiplicity" dictRef="me:spinMultiplicity">
    <scalar>2.00</scalar>
  </property>
  <property title="Vibrational Frequencies" dictRef="me:vibFreqs">
    <array units="cm-1">3762.87</array>
  </property>
  <property title="Rotational Constants" dictRef="me:rotConsts">

```

```

    <array units="cm-1">18.638</array>
  </property>
  <property title="Symmetry Number" dictRef="me:symmetryNumber">
    <scalar>1</scalar>
  </property>
    <property dictRef="me:frequenciesScaleFactor">
      <scalar>0.993</scalar>
    </property>
  </propertyList>
    <me:DOSCMMethod name="QMRotors" />
</molecule>

  <molecule id="Methyl-vinoxy" spinMultiplicity="2">
<atomArray>
  <atom id="a1" elementType="C" x3="1.377768" y3="0.656098" z3="-0.588781" />
  <atom id="a2" elementType="C" x3="1.050787" y3="0.416179" z3="-2.043330" />
  <atom id="a3" elementType="O" x3="1.430425" y3="-0.596608" z3="-2.628385" />
  <atom id="a4" elementType="C" spinMultiplicity="2" x3="0.278079" y3="1.407261" z3="-2.737943" />
  <atom id="a5" elementType="H" x3="1.960840" y3="-0.177513" z3="-0.206049" />
  <atom id="a6" elementType="H" x3="0.461158" y3="0.760829" z3="-0.005239" />
  <atom id="a7" elementType="H" x3="1.944099" y3="1.582331" z3="-0.474469" />
  <atom id="a8" elementType="H" x3="-0.067716" y3="2.305648" z3="-2.247202" />
  <atom id="a9" elementType="H" x3="0.041377" y3="1.241371" z3="-3.778023" />
</atomArray>
<bondArray>
  <bond id="b1" atomRefs2="a9 a4" order="1" />
  <bond id="b2" atomRefs2="a4 a8" order="1" />
  <bond id="b3" atomRefs2="a4 a2" order="1" />
  <bond id="b4" atomRefs2="a3 a2" order="2" />
  <bond id="b5" atomRefs2="a2 a1" order="1" />
  <bond id="b6" atomRefs2="a1 a7" order="1" />

```

```

<bond id="b7" atomRefs2="a1 a5" order="1" />
<bond id="b8" atomRefs2="a1 a6" order="1" />
</bondArray>
<propertyList>
  <property title="program">
    <scalar>Gaussian 16, Revision C.01</scalar>
  </property>
  <property title="basis">
    <scalar>def2TZVP (5D, 7F)</scalar>
  </property>
  <property title="method">
    <scalar>mn15</scalar>
  </property>
  <property title="File Format">
    <scalar>g03</scalar>
  </property>
  <property title="Energy" dictRef="me:ZPE">
    <scalar units="kJ/mol" >11.83</scalar>
  </property>
  <property title="SpinMultiplicity" dictRef="me:spinMultiplicity">
    <scalar>2.00</scalar>
  </property>
  <property title="Vibrational Frequencies" dictRef="me:vibFreqs">
    <array units="cm-1">366.32 506.50 515.00 761.64 835.02 921.67 1015.23 1051.99 1278.18 1383.00
1445.47 1460.13 1462.34 1647.86 3072.68 3141.58 3192.41 3194.24 3312.48</array>
  </property>
  <property title="Rotational Constants" dictRef="me:rotConsts">
    <array units="cm-1">0.367 0.305 0.172</array>
  </property>
  <property title="Symmetry Number" dictRef="me:symmetryNumber">
    <scalar>1</scalar>

```



```

</property>
    <property dictRef="me:frequenciesScaleFactor">
    <scalar>0.993</scalar>
    </property>
</propertyList>
    <me:DOSCMMethod name="QMRotors" />

    <!-- Frequency 61.67 has been eliminated in favour of a 1 dimensional hindered rotor. 1-2
Dihedral Me rotation -->
    <me:ExtraDOSCMMethod xsi:type="me:HinderedRotorQM1D">
    <me:bondRef>b5</me:bondRef>
    <me:HinderedRotorPotential format="numerical" units="kJ/mol" expansionSize="10"
UseSineTerms="yes">
        <me:PotentialPoint angle="0" potential=" 0.0000000"/>
<me:PotentialPoint angle="5" potential=" 0.0000000"/>
<me:PotentialPoint angle="10" potential=" 0.0525100"/>
<me:PotentialPoint angle="15" potential=" 0.1312750"/>
<me:PotentialPoint angle="20" potential=" 0.2100400"/>
<me:PotentialPoint angle="25" potential=" 0.3150600"/>
<me:PotentialPoint angle="30" potential=" 0.4200800"/>
<me:PotentialPoint angle="35" potential=" 0.4988450"/>
<me:PotentialPoint angle="40" potential=" 0.6038650"/>
<me:PotentialPoint angle="45" potential=" 0.6563750"/>
<me:PotentialPoint angle="50" potential=" 0.7088850"/>
<me:PotentialPoint angle="55" potential=" 0.7351400"/>
<me:PotentialPoint angle="60" potential=" 0.7351400"/>
<me:PotentialPoint angle="65" potential=" 0.7351400"/>
<me:PotentialPoint angle="70" potential=" 0.6826300"/>
<me:PotentialPoint angle="75" potential=" 0.6301200"/>
<me:PotentialPoint angle="80" potential=" 0.5513550"/>
<me:PotentialPoint angle="85" potential=" 0.4725900"/>
<me:PotentialPoint angle="90" potential=" 0.3675700"/>

```

<me:PotentialPoint angle="95" potential=" 0.2888050"/>  
<me:PotentialPoint angle="100" potential=" 0.1837850"/>  
<me:PotentialPoint angle="105" potential=" 0.1050200"/>  
<me:PotentialPoint angle="110" potential=" 0.0525100"/>  
<me:PotentialPoint angle="115" potential=" 0.0000000"/>  
<me:PotentialPoint angle="120" potential=" 0.0000000"/>  
<me:PotentialPoint angle="125" potential=" 0.0000000"/>  
<me:PotentialPoint angle="130" potential=" 0.0262550"/>  
<me:PotentialPoint angle="135" potential=" 0.1050200"/>  
<me:PotentialPoint angle="140" potential=" 0.1837850"/>  
<me:PotentialPoint angle="145" potential=" 0.2625500"/>  
<me:PotentialPoint angle="150" potential=" 0.3675700"/>  
<me:PotentialPoint angle="155" potential=" 0.4725900"/>  
<me:PotentialPoint angle="160" potential=" 0.5513550"/>  
<me:PotentialPoint angle="165" potential=" 0.6301200"/>  
<me:PotentialPoint angle="170" potential=" 0.6826300"/>  
<me:PotentialPoint angle="175" potential=" 0.7351400"/>  
<me:PotentialPoint angle="180" potential=" 0.7351400"/>  
<me:PotentialPoint angle="185" potential=" 0.7351400"/>  
<me:PotentialPoint angle="190" potential=" 0.7088850"/>  
<me:PotentialPoint angle="195" potential=" 0.6301200"/>  
<me:PotentialPoint angle="200" potential=" 0.5513550"/>  
<me:PotentialPoint angle="205" potential=" 0.4725900"/>  
<me:PotentialPoint angle="210" potential=" 0.3675700"/>  
<me:PotentialPoint angle="215" potential=" 0.2625500"/>  
<me:PotentialPoint angle="220" potential=" 0.1837850"/>  
<me:PotentialPoint angle="225" potential=" 0.1050200"/>  
<me:PotentialPoint angle="230" potential=" 0.0262550"/>  
<me:PotentialPoint angle="235" potential=" 0.0000000"/>  
<me:PotentialPoint angle="240" potential=" 0.0000000"/>  
<me:PotentialPoint angle="245" potential=" 0.0000000"/>

```

<me:PotentialPoint angle="250" potential=" 0.0525100"/>
<me:PotentialPoint angle="255" potential=" 0.1050200"/>
<me:PotentialPoint angle="260" potential=" 0.1837850"/>
<me:PotentialPoint angle="265" potential=" 0.2888050"/>
<me:PotentialPoint angle="270" potential=" 0.3675700"/>
<me:PotentialPoint angle="275" potential=" 0.4725900"/>
<me:PotentialPoint angle="280" potential=" 0.5513550"/>
<me:PotentialPoint angle="285" potential=" 0.6301200"/>
<me:PotentialPoint angle="290" potential=" 0.6826300"/>
<me:PotentialPoint angle="295" potential=" 0.7351400"/>
<me:PotentialPoint angle="300" potential=" 0.7351400"/>
<me:PotentialPoint angle="305" potential=" 0.7351400"/>
<me:PotentialPoint angle="310" potential=" 0.7088850"/>
<me:PotentialPoint angle="315" potential=" 0.6563750"/>
<me:PotentialPoint angle="320" potential=" 0.6038650"/>
<me:PotentialPoint angle="325" potential=" 0.5251000"/>
<me:PotentialPoint angle="330" potential=" 0.4200800"/>
<me:PotentialPoint angle="335" potential=" 0.3150600"/>
<me:PotentialPoint angle="340" potential=" 0.2100400"/>
<me:PotentialPoint angle="345" potential=" 0.1312750"/>
<me:PotentialPoint angle="350" potential=" 0.0525100"/>
<me:PotentialPoint angle="355" potential=" 0.0000000"/>
</me:HinderedRotorPotential>

<me:periodicity>3</me:periodicity>

</me:ExtraDOSCMETHOD>

```

```

<!-- Frequency 372.51 has been eliminated in favour of a 1 dimensional hindered rotor. 2-4
Dihedral rotation -->

```

```

<me:ExtraDOSCMETHOD xsi:type="me:HinderedRotorQM1D">
  <me:bondRef>b3</me:bondRef>
  <me:HinderedRotorPotential format="numerical" units="kJ/mol" expansionSize="10"
UseSineTerms="yes">

```

<me:PotentialPoint angle="0" potential=" 0.000000"/>  
<me:PotentialPoint angle="5" potential=" 0.1837850"/>  
<me:PotentialPoint angle="10" potential=" 0.7351400"/>  
<me:PotentialPoint angle="15" potential=" 1.6803200"/>  
<me:PotentialPoint angle="20" potential=" 2.9668150"/>  
<me:PotentialPoint angle="25" potential=" 4.5946250"/>  
<me:PotentialPoint angle="30" potential=" 6.5374950"/>  
<me:PotentialPoint angle="35" potential=" 8.8216800"/>  
<me:PotentialPoint angle="40" potential="11.3684150"/>  
<me:PotentialPoint angle="45" potential="14.1514450"/>  
<me:PotentialPoint angle="50" potential="17.1445150"/>  
<me:PotentialPoint angle="55" potential="20.2951150"/>  
<me:PotentialPoint angle="60" potential="23.5769900"/>  
<me:PotentialPoint angle="65" potential="26.8851200"/>  
<me:PotentialPoint angle="70" potential="30.1932500"/>  
<me:PotentialPoint angle="75" potential="33.3963600"/>  
<me:PotentialPoint angle="80" potential="36.4156850"/>  
<me:PotentialPoint angle="85" potential="39.1462050"/>  
<me:PotentialPoint angle="90" potential="41.4041350"/>  
<me:PotentialPoint angle="95" potential="41.9292350"/>  
<me:PotentialPoint angle="100" potential="39.6975600"/>  
<me:PotentialPoint angle="105" potential="36.9932950"/>  
<me:PotentialPoint angle="110" potential="33.9739700"/>  
<me:PotentialPoint angle="115" potential="30.7183500"/>  
<me:PotentialPoint angle="120" potential="27.3314550"/>  
<me:PotentialPoint angle="125" potential="23.8920500"/>  
<me:PotentialPoint angle="130" potential="20.4263900"/>  
<me:PotentialPoint angle="135" potential="17.0657500"/>  
<me:PotentialPoint angle="140" potential="13.8363850"/>  
<me:PotentialPoint angle="145" potential="10.8170600"/>  
<me:PotentialPoint angle="150" potential=" 8.0602850"/>

<me:PotentialPoint angle="155" potential=" 5.6448250"/>  
<me:PotentialPoint angle="160" potential=" 3.6231900"/>  
<me:PotentialPoint angle="165" potential=" 2.0478900"/>  
<me:PotentialPoint angle="170" potential=" 0.8926700"/>  
<me:PotentialPoint angle="175" potential=" 0.2100400"/>  
<me:PotentialPoint angle="180" potential=" 0.0000000"/>  
<me:PotentialPoint angle="185" potential=" 0.2100400"/>  
<me:PotentialPoint angle="190" potential=" 0.8926700"/>  
<me:PotentialPoint angle="195" potential=" 2.0216350"/>  
<me:PotentialPoint angle="200" potential=" 3.6231900"/>  
<me:PotentialPoint angle="205" potential=" 5.6448250"/>  
<me:PotentialPoint angle="210" potential=" 8.0602850"/>  
<me:PotentialPoint angle="215" potential="10.7908050"/>  
<me:PotentialPoint angle="220" potential="13.8101300"/>  
<me:PotentialPoint angle="225" potential="17.0394950"/>  
<me:PotentialPoint angle="230" potential="20.4263900"/>  
<me:PotentialPoint angle="235" potential="23.8657950"/>  
<me:PotentialPoint angle="240" potential="27.3314550"/>  
<me:PotentialPoint angle="245" potential="30.7183500"/>  
<me:PotentialPoint angle="250" potential="33.9477150"/>  
<me:PotentialPoint angle="255" potential="36.9670400"/>  
<me:PotentialPoint angle="260" potential="39.6713050"/>  
<me:PotentialPoint angle="265" potential="41.9292350"/>  
<me:PotentialPoint angle="270" potential="41.4303900"/>  
<me:PotentialPoint angle="275" potential="39.1724600"/>  
<me:PotentialPoint angle="280" potential="36.4419400"/>  
<me:PotentialPoint angle="285" potential="33.4226150"/>  
<me:PotentialPoint angle="290" potential="30.2195050"/>  
<me:PotentialPoint angle="295" potential="26.9113750"/>  
<me:PotentialPoint angle="300" potential="23.5769900"/>  
<me:PotentialPoint angle="305" potential="20.3213700"/>

```

<me:PotentialPoint angle="310" potential="17.1707700"/>
<me:PotentialPoint angle="315" potential="14.1777000"/>
<me:PotentialPoint angle="320" potential="11.3684150"/>
<me:PotentialPoint angle="325" potential=" 8.8216800"/>
<me:PotentialPoint angle="330" potential=" 6.5637500"/>
<me:PotentialPoint angle="335" potential=" 4.5946250"/>
<me:PotentialPoint angle="340" potential=" 2.9668150"/>
<me:PotentialPoint angle="345" potential=" 1.6803200"/>
<me:PotentialPoint angle="350" potential=" 0.7351400"/>
<me:PotentialPoint angle="355" potential=" 0.1837850"/>
</me:HinderedRotorPotential>
      <me:periodicity>2</me:periodicity>
</me:ExtraDOSMethod>

```

```

</molecule>

```

```

<molecule id="Methyl-VHP" spinMultiplicity="1">

```

```

  <atomArray>

```

```

    <atom id="a1" elementType="C" x3="0.999549" y3="-0.184259" z3="-0.162252" />
    <atom id="a2" elementType="C" x3="0.581386" y3="0.294677" z3="-1.511105" />
    <atom id="a3" elementType="O" x3="-0.205025" y3="-0.550839" z3="-2.260355" />
    <atom id="a4" elementType="O" x3="-1.118524" y3="-1.238050" z3="-1.412596" />
    <atom id="a5" elementType="H" x3="-0.935999" y3="-2.158799" z3="-1.650821" />
    <atom id="a6" elementType="C" x3="0.964317" y3="1.424289" z3="-2.095127" />
    <atom id="a7" elementType="H" x3="1.408704" y3="-1.194846" z3="-0.223044" />
    <atom id="a8" elementType="H" x3="0.154251" y3="-0.212273" z3="0.524041" />
    <atom id="a9" elementType="H" x3="1.758898" y3="0.484382" z3="0.238211" />
    <atom id="a10" elementType="H" x3="1.686148" y3="2.067042" z3="-1.613136" />
    <atom id="a11" elementType="H" x3="0.584989" y3="1.698077" z3="-3.069557" />

```

```

  </atomArray>

```

```

  <bondArray>

```

```

<bond id="b1" atomRefs2="a11 a6" order="1" />
<bond id="b2" atomRefs2="a3 a2" order="1" />
<bond id="b3" atomRefs2="a3 a4" order="1" />
<bond id="b4" atomRefs2="a6 a10" order="1" />
<bond id="b5" atomRefs2="a6 a2" order="2" />
<bond id="b6" atomRefs2="a5 a4" order="1" />
<bond id="b7" atomRefs2="a2 a1" order="1" />
<bond id="b8" atomRefs2="a7 a1" order="1" />
<bond id="b9" atomRefs2="a1 a9" order="1" />
<bond id="b10" atomRefs2="a1 a8" order="1" />
</bondArray>
<propertyList>
  <property title="program">
    <scalar>Gaussian 16, Revision B.01</scalar>
  </property>
  <property title="basis">
    <scalar>def2TZVP (5D, 7F)</scalar>
  </property>
  <property title="method">
    <scalar>mn15</scalar>
  </property>
  <property title="File Format">
    <scalar>g03</scalar>
  </property>
  <property title="Energy" dictRef="me:ZPE">
    <scalar units="kJ/mol">-59.75</scalar>
  </property>
  <property title="Vibrational Frequencies" dictRef="me:vibFreqs">
    <array units="cm-1">320.84 405.42 473.58 563.31 734.32 851.24 884.42 932.61 1011.07 1039.60
1057.79 1293.11 1384.43 1395.31 1421.69 1455.80 1471.65 1742.32 3076.48 3149.68 3179.16 3201.43
3299.93 3831.03</array>
  </property>

```

```

<property title="Rotational Constants" dictRef="me:rotConsts">
  <array units="cm-1">0.285 0.148 0.103</array>
</property>
<property title="Symmetry Number" dictRef="me:symmetryNumber">
  <scalar>1</scalar>
</property>
<property dictRef="me:sigma" >
  <scalar>4.46</scalar>
</property>
<property dictRef="me:epsilon" >
  <scalar>382.7</scalar>
</property>
<property dictRef="me:frequenciesScaleFactor">
  <scalar>0.993</scalar>
</property>
</propertyList>

```

```

<me:DOSCMMethod name="QMRotors" />

```

```

  <!-- Frequency 221.84 has been eliminated in favour of a 1 dimensional hindered rotor. 1-2
  Dihedral Me rotation -->

```

```

  <me:ExtraDOSCMMethod xsi:type="me:HinderedRotorQM1D">

```

```

    <me:bondRef>b7</me:bondRef>

```

```

    <me:HinderedRotorPotential format="numerical" units="kJ/mol" expansionSize="10"
    UseSineTerms="yes">

```

```

      <me:PotentialPoint angle="0" potential=" 0.0000000"/>

```

```

<me:PotentialPoint angle="5" potential=" 0.1837850"/>

```

```

<me:PotentialPoint angle="10" potential=" 0.7088850"/>

```

```

<me:PotentialPoint angle="15" potential=" 1.4965350"/>

```

```

<me:PotentialPoint angle="20" potential=" 2.5204800"/>

```

```

<me:PotentialPoint angle="25" potential=" 3.6494450"/>

```

```

<me:PotentialPoint angle="30" potential=" 4.8571750"/>

```



<me:PotentialPoint angle="35" potential=" 6.0386500"/>  
<me:PotentialPoint angle="40" potential=" 7.1938700"/>  
<me:PotentialPoint angle="45" potential=" 8.2178150"/>  
<me:PotentialPoint angle="50" potential=" 9.0842300"/>  
<me:PotentialPoint angle="55" potential=" 9.6880950"/>  
<me:PotentialPoint angle="60" potential="10.0031550"/>  
<me:PotentialPoint angle="65" potential=" 9.9769000"/>  
<me:PotentialPoint angle="70" potential=" 9.6093300"/>  
<me:PotentialPoint angle="75" potential=" 8.9004450"/>  
<me:PotentialPoint angle="80" potential=" 7.9290100"/>  
<me:PotentialPoint angle="85" potential=" 6.7212800"/>  
<me:PotentialPoint angle="90" potential=" 5.3822750"/>  
<me:PotentialPoint angle="95" potential=" 4.0170150"/>  
<me:PotentialPoint angle="100" potential=" 2.7305200"/>  
<me:PotentialPoint angle="105" potential=" 1.6278100"/>  
<me:PotentialPoint angle="110" potential=" 0.7613950"/>  
<me:PotentialPoint angle="115" potential=" 0.2100400"/>  
<me:PotentialPoint angle="120" potential=" 0.0000000"/>  
<me:PotentialPoint angle="125" potential=" 0.1837850"/>  
<me:PotentialPoint angle="130" potential=" 0.7088850"/>  
<me:PotentialPoint angle="135" potential=" 1.5227900"/>  
<me:PotentialPoint angle="140" potential=" 2.5729900"/>  
<me:PotentialPoint angle="145" potential=" 3.7019550"/>  
<me:PotentialPoint angle="150" potential=" 4.9096850"/>  
<me:PotentialPoint angle="155" potential=" 6.0911600"/>  
<me:PotentialPoint angle="160" potential=" 7.2463800"/>  
<me:PotentialPoint angle="165" potential=" 8.2703250"/>  
<me:PotentialPoint angle="170" potential=" 9.1104850"/>  
<me:PotentialPoint angle="175" potential=" 9.7143500"/>  
<me:PotentialPoint angle="180" potential="10.0031550"/>  
<me:PotentialPoint angle="185" potential=" 9.9769000"/>

<me:PotentialPoint angle="190" potential=" 9.5830750"/>  
<me:PotentialPoint angle="195" potential=" 8.9004450"/>  
<me:PotentialPoint angle="200" potential=" 7.9027550"/>  
<me:PotentialPoint angle="205" potential=" 6.6950250"/>  
<me:PotentialPoint angle="210" potential=" 5.3822750"/>  
<me:PotentialPoint angle="215" potential=" 4.0432700"/>  
<me:PotentialPoint angle="220" potential=" 2.7830300"/>  
<me:PotentialPoint angle="225" potential=" 1.6540650"/>  
<me:PotentialPoint angle="230" potential=" 0.7876500"/>  
<me:PotentialPoint angle="235" potential=" 0.2362950"/>  
<me:PotentialPoint angle="240" potential=" 0.0000000"/>  
<me:PotentialPoint angle="245" potential=" 0.1575300"/>  
<me:PotentialPoint angle="250" potential=" 0.6301200"/>  
<me:PotentialPoint angle="255" potential=" 1.4440250"/>  
<me:PotentialPoint angle="260" potential=" 2.4679700"/>  
<me:PotentialPoint angle="265" potential=" 3.6231900"/>  
<me:PotentialPoint angle="270" potential=" 4.8309200"/>  
<me:PotentialPoint angle="275" potential=" 6.0386500"/>  
<me:PotentialPoint angle="280" potential=" 7.1938700"/>  
<me:PotentialPoint angle="285" potential=" 8.2440700"/>  
<me:PotentialPoint angle="290" potential=" 9.0842300"/>  
<me:PotentialPoint angle="295" potential=" 9.7143500"/>  
<me:PotentialPoint angle="300" potential="10.0031550"/>  
<me:PotentialPoint angle="305" potential=" 9.9769000"/>  
<me:PotentialPoint angle="310" potential=" 9.5830750"/>  
<me:PotentialPoint angle="315" potential=" 8.8479350"/>  
<me:PotentialPoint angle="320" potential=" 7.8502450"/>  
<me:PotentialPoint angle="325" potential=" 6.6162600"/>  
<me:PotentialPoint angle="330" potential=" 5.2772550"/>  
<me:PotentialPoint angle="335" potential=" 3.9119950"/>  
<me:PotentialPoint angle="340" potential=" 2.6517550"/>

```
<me:PotentialPoint angle="345" potential=" 1.5490450"/>
<me:PotentialPoint angle="350" potential=" 0.7088850"/>
<me:PotentialPoint angle="355" potential=" 0.1837850"/>
    </me:HinderedRotorPotential>
    <me:periodicity>3</me:periodicity>
</me:ExtraDOSCMETHOD>
```

<!-- Frequency 90.10 has been eliminated in favour of a 1 dimensional hindered rotor. 2-3  
Dihedral rotation -->

```
<me:ExtraDOSCMETHOD xsi:type="me:HinderedRotorQM1D">
    <me:bondRef>b2</me:bondRef>
    <me:HinderedRotorPotential format="numerical" units="kJ/mol" expansionSize="10"
    UseSineTerms="yes">
```

```
        <me:PotentialPoint angle="0" potential=" 0.000000"/>
<me:PotentialPoint angle="5" potential=" 0.105020"/>
<me:PotentialPoint angle="10" potential=" 0.472590"/>
<me:PotentialPoint angle="15" potential=" 1.102710"/>
<me:PotentialPoint angle="20" potential=" 2.021635"/>
<me:PotentialPoint angle="25" potential=" 3.203110"/>
<me:PotentialPoint angle="30" potential=" 4.647135"/>
<me:PotentialPoint angle="35" potential=" 6.301200"/>
<me:PotentialPoint angle="40" potential=" 8.139050"/>
<me:PotentialPoint angle="45" potential=" 10.108175"/>
<me:PotentialPoint angle="50" potential=" 12.051045"/>
<me:PotentialPoint angle="55" potential=" 13.862640"/>
<me:PotentialPoint angle="60" potential=" 15.385430"/>
<me:PotentialPoint angle="65" potential=" 16.435630"/>
<me:PotentialPoint angle="70" potential=" 16.934475"/>
<me:PotentialPoint angle="75" potential=" 16.776945"/>
<me:PotentialPoint angle="80" potential=" 15.936785"/>
<me:PotentialPoint angle="85" potential=" 14.466505"/>
<me:PotentialPoint angle="90" potential=" 12.418615"/>
```

<me:PotentialPoint angle="95" potential=" 9.924390"/>  
<me:PotentialPoint angle="100" potential=" 7.115105"/>  
<me:PotentialPoint angle="105" potential=" 4.122035"/>  
<me:PotentialPoint angle="110" potential=" 1.076455"/>  
<me:PotentialPoint angle="115" potential=" -1.864105"/>  
<me:PotentialPoint angle="120" potential=" -4.568370"/>  
<me:PotentialPoint angle="125" potential=" -6.905065"/>  
<me:PotentialPoint angle="130" potential=" -8.821680"/>  
<me:PotentialPoint angle="135" potential=" -10.186940"/>  
<me:PotentialPoint angle="140" potential=" -11.000845"/>  
<me:PotentialPoint angle="145" potential=" -11.237140"/>  
<me:PotentialPoint angle="150" potential=" -10.895825"/>  
<me:PotentialPoint angle="155" potential=" -10.003155"/>  
<me:PotentialPoint angle="160" potential=" -8.559130"/>  
<me:PotentialPoint angle="165" potential=" -6.616260"/>  
<me:PotentialPoint angle="170" potential=" -4.253310"/>  
<me:PotentialPoint angle="175" potential=" -1.575300"/>  
<me:PotentialPoint angle="180" potential=" 1.339005"/>  
<me:PotentialPoint angle="185" potential=" 4.358330"/>  
<me:PotentialPoint angle="190" potential=" 7.298890"/>  
<me:PotentialPoint angle="195" potential=" 10.081920"/>  
<me:PotentialPoint angle="200" potential=" 12.471125"/>  
<me:PotentialPoint angle="205" potential=" 14.361485"/>  
<me:PotentialPoint angle="210" potential=" 15.569215"/>  
<me:PotentialPoint angle="215" potential=" 16.015550"/>  
<me:PotentialPoint angle="220" potential=" 15.621725"/>  
<me:PotentialPoint angle="225" potential=" 14.519015"/>  
<me:PotentialPoint angle="230" potential=" 12.943715"/>  
<me:PotentialPoint angle="235" potential=" 11.027100"/>  
<me:PotentialPoint angle="240" potential=" 9.005465"/>  
<me:PotentialPoint angle="245" potential=" 7.010085"/>

```

<me:PotentialPoint angle="250" potential=" 5.172235"/>
<me:PotentialPoint angle="255" potential=" 3.570680"/>
<me:PotentialPoint angle="260" potential=" 2.257930"/>
<me:PotentialPoint angle="265" potential=" 1.207730"/>
<me:PotentialPoint angle="270" potential=" 0.420080"/>
<me:PotentialPoint angle="275" potential=" -0.183785"/>
<me:PotentialPoint angle="280" potential=" -0.551355"/>
<me:PotentialPoint angle="285" potential=" -0.708885"/>
<me:PotentialPoint angle="290" potential=" -0.630120"/>
<me:PotentialPoint angle="295" potential=" -0.367570"/>
<me:PotentialPoint angle="300" potential=" 0.000000"/>
<me:PotentialPoint angle="305" potential=" 0.472590"/>
<me:PotentialPoint angle="310" potential=" 0.892670"/>
<me:PotentialPoint angle="315" potential=" 1.286495"/>
<me:PotentialPoint angle="320" potential=" 1.522790"/>
<me:PotentialPoint angle="325" potential=" 1.627810"/>
<me:PotentialPoint angle="330" potential=" 1.549045"/>
<me:PotentialPoint angle="335" potential=" 1.339005"/>
<me:PotentialPoint angle="340" potential=" 1.050200"/>
<me:PotentialPoint angle="345" potential=" 0.682630"/>
<me:PotentialPoint angle="350" potential=" 0.341315"/>
<me:PotentialPoint angle="355" potential=" 0.105020"/>
</me:HinderedRotorPotential>

```

```

</me:ExtraDOSCMETHOD>

```

```

<!-- Frequency 182.72 has been eliminated in favour of a 1 dimensional hindered rotor. 3-4
Dihedral rotation -->

```

```

<me:ExtraDOSCMETHOD xsi:type="me:HinderedRotorQM1D">

```

```

<me:bondRef>b3</me:bondRef>

```

```

<me:HinderedRotorPotential format="numerical" units="kJ/mol" expansionSize="10"
UseSineTerms="yes">

```

```

<me:PotentialPoint angle="0" potential=" 0.000000"/>

```

<me:PotentialPoint angle="5" potential=" 0.0525100"/>  
<me:PotentialPoint angle="10" potential=" 0.1575300"/>  
<me:PotentialPoint angle="15" potential=" 0.3938250"/>  
<me:PotentialPoint angle="20" potential=" 0.7088850"/>  
<me:PotentialPoint angle="25" potential=" 1.1552200"/>  
<me:PotentialPoint angle="30" potential=" 1.7328300"/>  
<me:PotentialPoint angle="35" potential=" 2.4417150"/>  
<me:PotentialPoint angle="40" potential=" 3.3343850"/>  
<me:PotentialPoint angle="45" potential=" 4.4108400"/>  
<me:PotentialPoint angle="50" potential=" 5.6448250"/>  
<me:PotentialPoint angle="55" potential=" 7.0625950"/>  
<me:PotentialPoint angle="60" potential=" 8.6641500"/>  
<me:PotentialPoint angle="65" potential="10.3969800"/>  
<me:PotentialPoint angle="70" potential="12.2610850"/>  
<me:PotentialPoint angle="75" potential="14.2039550"/>  
<me:PotentialPoint angle="80" potential="16.1468250"/>  
<me:PotentialPoint angle="85" potential="18.0896950"/>  
<me:PotentialPoint angle="90" potential="19.8750350"/>  
<me:PotentialPoint angle="95" potential="21.4765900"/>  
<me:PotentialPoint angle="100" potential="22.8418500"/>  
<me:PotentialPoint angle="105" potential="23.9183050"/>  
<me:PotentialPoint angle="110" potential="24.7059550"/>  
<me:PotentialPoint angle="115" potential="25.2048000"/>  
<me:PotentialPoint angle="120" potential="25.3623300"/>  
<me:PotentialPoint angle="125" potential="25.2048000"/>  
<me:PotentialPoint angle="130" potential="24.7584650"/>  
<me:PotentialPoint angle="135" potential="23.9708150"/>  
<me:PotentialPoint angle="140" potential="22.8681050"/>  
<me:PotentialPoint angle="145" potential="21.4765900"/>  
<me:PotentialPoint angle="150" potential="19.8225250"/>  
<me:PotentialPoint angle="155" potential="17.9321650"/>

<me:PotentialPoint angle="160" potential="15.8842750"/>  
<me:PotentialPoint angle="165" potential="13.7838750"/>  
<me:PotentialPoint angle="170" potential="11.7359850"/>  
<me:PotentialPoint angle="175" potential=" 9.7406050"/>  
<me:PotentialPoint angle="180" potential=" 7.9027550"/>  
<me:PotentialPoint angle="185" potential=" 6.1961800"/>  
<me:PotentialPoint angle="190" potential=" 4.6996450"/>  
<me:PotentialPoint angle="195" potential=" 3.3606400"/>  
<me:PotentialPoint angle="200" potential=" 2.2316750"/>  
<me:PotentialPoint angle="205" potential=" 1.2864950"/>  
<me:PotentialPoint angle="210" potential=" 0.5513550"/>  
<me:PotentialPoint angle="215" potential=" 0.0000000"/>  
<me:PotentialPoint angle="220" potential="-0.3938250"/>  
<me:PotentialPoint angle="225" potential="-0.6301200"/>  
<me:PotentialPoint angle="230" potential="-0.7088850"/>  
<me:PotentialPoint angle="235" potential="-0.6563750"/>  
<me:PotentialPoint angle="240" potential="-0.5251000"/>  
<me:PotentialPoint angle="245" potential="-0.2888050"/>  
<me:PotentialPoint angle="250" potential=" 0.0000000"/>  
<me:PotentialPoint angle="255" potential=" 0.3150600"/>  
<me:PotentialPoint angle="260" potential=" 0.6301200"/>  
<me:PotentialPoint angle="265" potential=" 0.9451800"/>  
<me:PotentialPoint angle="270" potential=" 1.2602400"/>  
<me:PotentialPoint angle="275" potential=" 1.4965350"/>  
<me:PotentialPoint angle="280" potential=" 1.7065750"/>  
<me:PotentialPoint angle="285" potential=" 1.8641050"/>  
<me:PotentialPoint angle="290" potential=" 1.9691250"/>  
<me:PotentialPoint angle="295" potential=" 1.9953800"/>  
<me:PotentialPoint angle="300" potential=" 1.9691250"/>  
<me:PotentialPoint angle="305" potential=" 1.8903600"/>  
<me:PotentialPoint angle="310" potential=" 1.7590850"/>

```

<me:PotentialPoint angle="315" potential=" 1.6015550"/>
<me:PotentialPoint angle="320" potential=" 1.3915150"/>
<me:PotentialPoint angle="325" potential=" 1.1814750"/>
<me:PotentialPoint angle="330" potential=" 0.9451800"/>
<me:PotentialPoint angle="335" potential=" 0.7088850"/>
<me:PotentialPoint angle="340" potential=" 0.4725900"/>
<me:PotentialPoint angle="345" potential=" 0.2888050"/>
<me:PotentialPoint angle="350" potential=" 0.1312750"/>
<me:PotentialPoint angle="355" potential=" 0.0262550"/>
    </me:HinderedRotorPotential>
</me:ExtraDOSCMETHOD>

<me:DistributionCalcMethod name="Boltzmann" />
<me:energyTransferModel xsi:type="me:ExponentialDown">
    <me:deltaEDown units="cm-1" referenceTemperature="298.0" >91.422</me:deltaEDown>
    <me:deltaEDownTExponent referenceTemperature="298.0" >0.995832</me:deltaEDownTExponent>
</me:energyTransferModel>
</molecule>

<molecule id="Me2COO" spinMultiplicity="1" >
    <atomArray>
        <atom id="a1" elementType="C" x3="0.514438" y3="-0.513304" z3="-1.328675" />
        <atom id="a2" elementType="C" spinMultiplicity="2" x3="0.431297" y3="-0.097242" z3="0.077740" />
        <atom id="a3" elementType="O" spinMultiplicity="2" x3="-1.694385" y3="0.420841" z3="-0.371211"
    />
        <atom id="a4" elementType="O" x3="-0.659943" y3="0.353551" z3="0.512236" />
        <atom id="a5" elementType="C" x3="1.553234" y3="-0.168112" z3="1.043778" />
        <atom id="a6" elementType="H" x3="0.222831" y3="0.334188" z3="-1.955976" />
        <atom id="a7" elementType="H" x3="-0.260557" y3="-1.263359" z3="-1.511936" />
        <atom id="a8" elementType="H" x3="1.504744" y3="-0.883405" z3="-1.582214" />
        <atom id="a9" elementType="H" x3="2.394878" y3="0.426040" z3="0.680803" />

```



```
<atom id="a10" elementType="H" x3="1.240334" y3="0.197314" z3="2.018853" />
<atom id="a11" elementType="H" x3="1.903553" y3="-1.198934" z3="1.132145" />
</atomArray>
<bondArray>
  <bond id="b1" atomRefs2="a6 a1" order="1" />
  <bond id="b2" atomRefs2="a8 a1" order="1" />
  <bond id="b3" atomRefs2="a7 a1" order="1" />
  <bond id="b4" atomRefs2="a1 a2" order="1" />
  <bond id="b5" atomRefs2="a3 a4" order="1" />
  <bond id="b6" atomRefs2="a2 a4" order="1" />
  <bond id="b7" atomRefs2="a2 a5" order="1" />
  <bond id="b8" atomRefs2="a9 a5" order="1" />
  <bond id="b9" atomRefs2="a5 a11" order="1" />
  <bond id="b10" atomRefs2="a5 a10" order="1" />
</bondArray>
<propertyList>
  <property title="program">
    <scalar>Gaussian 16, Revision B.01</scalar>
  </property>
  <property title="basis">
    <scalar>def2TZVP (5D, 7F)</scalar>
  </property>
  <property title="method">
    <scalar>mn15</scalar>
  </property>
  <property title="File Format">
    <scalar>g03</scalar>
  </property>
  <property title="Energy" dictRef="me:ZPE">
    <scalar units="kJ/mol" >0</scalar>
  </property>
</propertyList>
```

```

<property title="Vibrational Frequencies" dictRef="me:vibFreqs">
  <array units="cm-1">285.98 319.85 347.62 481.07 599.97 824.08 911.44 949.81 972.69 1069.13
1081.19 1304.79 1376.88 1397.45 1415.37 1448.25 1452.94 1472.80 1628.10 3059.86 3068.96 3114.37
3131.24 3190.16 3191.84</array>
</property>
<property title="Rotational Constants" dictRef="me:rotConsts">
  <array units="cm-1">0.299 0.146 0.102</array>
</property>
<property title="Symmetry Number" dictRef="me:symmetryNumber">
  <scalar>1</scalar>
</property>
<property dictRef="me:sigma" >
  <scalar>4.46</scalar>
</property>
<property dictRef="me:epsilon" >
  <scalar>382.7</scalar>
</property>
<property dictRef="me:frequenciesScaleFactor">
  <scalar>0.993</scalar>
</property>
</propertyList>
<me:DOSCMMethod name="QMRotors" />

```

```

<!-- Frequency 162.06 has been eliminated in favour of a 1 dimensional hindered rotor. 2-5
Dihedral Me rotation -->

```

```

<me:ExtraDOSCMMethod xsi:type="me:HinderedRotorQM1D">
  <me:bondRef>b7</me:bondRef>
  <me:HinderedRotorPotential format="numerical" units="kJ/mol" expansionSize="10"
UseSineTerms="yes">
    <me:PotentialPoint angle="0" potential=" 0.000000"/>
  <me:PotentialPoint angle="5" potential=" 0.1050200"/>
  <me:PotentialPoint angle="10" potential=" 0.3938250"/>

```

<me:PotentialPoint angle="15" potential=" 0.8401600"/>  
<me:PotentialPoint angle="20" potential=" 1.4440250"/>  
<me:PotentialPoint angle="25" potential=" 2.1529100"/>  
<me:PotentialPoint angle="30" potential=" 2.9668150"/>  
<me:PotentialPoint angle="35" potential=" 3.8332300"/>  
<me:PotentialPoint angle="40" potential=" 4.6733900"/>  
<me:PotentialPoint angle="45" potential=" 5.4347850"/>  
<me:PotentialPoint angle="50" potential=" 6.0911600"/>  
<me:PotentialPoint angle="55" potential=" 6.5374950"/>  
<me:PotentialPoint angle="60" potential=" 6.7737900"/>  
<me:PotentialPoint angle="65" potential=" 6.7475350"/>  
<me:PotentialPoint angle="70" potential=" 6.4587300"/>  
<me:PotentialPoint angle="75" potential=" 5.9598850"/>  
<me:PotentialPoint angle="80" potential=" 5.2510000"/>  
<me:PotentialPoint angle="85" potential=" 4.4370950"/>  
<me:PotentialPoint angle="90" potential=" 3.5444250"/>  
<me:PotentialPoint angle="95" potential=" 2.6517550"/>  
<me:PotentialPoint angle="100" potential=" 1.8115950"/>  
<me:PotentialPoint angle="105" potential=" 1.1027100"/>  
<me:PotentialPoint angle="110" potential=" 0.5513550"/>  
<me:PotentialPoint angle="115" potential=" 0.1837850"/>  
<me:PotentialPoint angle="120" potential=" 0.0000000"/>  
<me:PotentialPoint angle="125" potential=" 0.0787650"/>  
<me:PotentialPoint angle="130" potential=" 0.3413150"/>  
<me:PotentialPoint angle="135" potential=" 0.8139050"/>  
<me:PotentialPoint angle="140" potential=" 1.4440250"/>  
<me:PotentialPoint angle="145" potential=" 2.2316750"/>  
<me:PotentialPoint angle="150" potential=" 3.0980900"/>  
<me:PotentialPoint angle="155" potential=" 3.9907600"/>  
<me:PotentialPoint angle="160" potential=" 4.8571750"/>  
<me:PotentialPoint angle="165" potential=" 5.6448250"/>

<me:PotentialPoint angle="170" potential=" 6.2486900"/>  
<me:PotentialPoint angle="175" potential=" 6.6425150"/>  
<me:PotentialPoint angle="180" potential=" 6.8000450"/>  
<me:PotentialPoint angle="185" potential=" 6.6687700"/>  
<me:PotentialPoint angle="190" potential=" 6.3274550"/>  
<me:PotentialPoint angle="195" potential=" 5.7761000"/>  
<me:PotentialPoint angle="200" potential=" 5.0409600"/>  
<me:PotentialPoint angle="205" potential=" 4.2270550"/>  
<me:PotentialPoint angle="210" potential=" 3.3868950"/>  
<me:PotentialPoint angle="215" potential=" 2.5467350"/>  
<me:PotentialPoint angle="220" potential=" 1.7590850"/>  
<me:PotentialPoint angle="225" potential=" 1.1027100"/>  
<me:PotentialPoint angle="230" potential=" 0.5776100"/>  
<me:PotentialPoint angle="235" potential=" 0.2100400"/>  
<me:PotentialPoint angle="240" potential=" 0.0262550"/>  
<me:PotentialPoint angle="245" potential=" 0.0262550"/>  
<me:PotentialPoint angle="250" potential=" 0.2362950"/>  
<me:PotentialPoint angle="255" potential=" 0.6038650"/>  
<me:PotentialPoint angle="260" potential=" 1.1552200"/>  
<me:PotentialPoint angle="265" potential=" 1.8641050"/>  
<me:PotentialPoint angle="270" potential=" 2.6780100"/>  
<me:PotentialPoint angle="275" potential=" 3.5706800"/>  
<me:PotentialPoint angle="280" potential=" 4.4896050"/>  
<me:PotentialPoint angle="285" potential=" 5.3297650"/>  
<me:PotentialPoint angle="290" potential=" 6.0649050"/>  
<me:PotentialPoint angle="295" potential=" 6.5637500"/>  
<me:PotentialPoint angle="300" potential=" 6.7737900"/>  
<me:PotentialPoint angle="305" potential=" 6.6950250"/>  
<me:PotentialPoint angle="310" potential=" 6.3274550"/>  
<me:PotentialPoint angle="315" potential=" 5.6973350"/>  
<me:PotentialPoint angle="320" potential=" 4.9096850"/>

```

<me:PotentialPoint angle="325" potential=" 4.0170150"/>
<me:PotentialPoint angle="330" potential=" 3.1243450"/>
<me:PotentialPoint angle="335" potential=" 2.2579300"/>
<me:PotentialPoint angle="340" potential=" 1.4965350"/>
<me:PotentialPoint angle="345" potential=" 0.8664150"/>
<me:PotentialPoint angle="350" potential=" 0.3938250"/>
<me:PotentialPoint angle="355" potential=" 0.1050200"/>
    </me:HinderedRotorPotential>
    <me:periodicity>3</me:periodicity>
</me:ExtraDOSCMETHOD>

```

<!-- Frequency 216.14 has been eliminated in favour of a 1 dimensional hindered rotor. 1-2 Dihedral Me rotation -->

```

    <me:ExtraDOSCMETHOD xsi:type="me:HinderedRotorQM1D">
    <me:bondRef>b4</me:bondRef>
    <me:HinderedRotorPotential format="numerical" units="kJ/mol" expansionSize="10"
    UseSineTerms="yes">
        <me:PotentialPoint angle="0" potential=" 0.0000000"/>
<me:PotentialPoint angle="5" potential=" 0.1837850"/>
<me:PotentialPoint angle="10" potential=" 0.6563750"/>
<me:PotentialPoint angle="15" potential=" 1.3915150"/>
<me:PotentialPoint angle="20" potential=" 2.3629500"/>
<me:PotentialPoint angle="25" potential=" 3.4919150"/>
<me:PotentialPoint angle="30" potential=" 4.6996450"/>
<me:PotentialPoint angle="35" potential=" 5.9336300"/>
<me:PotentialPoint angle="40" potential=" 7.1151050"/>
<me:PotentialPoint angle="45" potential=" 8.1915600"/>
<me:PotentialPoint angle="50" potential=" 9.1104850"/>
<me:PotentialPoint angle="55" potential=" 9.7931150"/>
<me:PotentialPoint angle="60" potential="10.2657050"/>
<me:PotentialPoint angle="65" potential="10.4232350"/>
<me:PotentialPoint angle="70" potential="10.2919600"/>

```

<me:PotentialPoint angle="75" potential=" 9.8193700"/>  
<me:PotentialPoint angle="80" potential=" 9.0579750"/>  
<me:PotentialPoint angle="85" potential=" 7.9815200"/>  
<me:PotentialPoint angle="90" potential=" 6.7212800"/>  
<me:PotentialPoint angle="95" potential=" 5.3035100"/>  
<me:PotentialPoint angle="100" potential=" 3.8594850"/>  
<me:PotentialPoint angle="105" potential=" 2.5467350"/>  
<me:PotentialPoint angle="110" potential=" 1.4177700"/>  
<me:PotentialPoint angle="115" potential=" 0.5776100"/>  
<me:PotentialPoint angle="120" potential=" 0.1050200"/>  
<me:PotentialPoint angle="125" potential=" 0.0262550"/>  
<me:PotentialPoint angle="130" potential=" 0.3150600"/>  
<me:PotentialPoint angle="135" potential=" 0.9714350"/>  
<me:PotentialPoint angle="140" potential=" 1.9428700"/>  
<me:PotentialPoint angle="145" potential=" 3.2031100"/>  
<me:PotentialPoint angle="150" potential=" 4.5946250"/>  
<me:PotentialPoint angle="155" potential=" 6.0386500"/>  
<me:PotentialPoint angle="160" potential=" 7.3776550"/>  
<me:PotentialPoint angle="165" potential=" 8.5591300"/>  
<me:PotentialPoint angle="170" potential=" 9.4780550"/>  
<me:PotentialPoint angle="175" potential="10.0819200"/>  
<me:PotentialPoint angle="180" potential="10.3969800"/>  
<me:PotentialPoint angle="185" potential="10.3707250"/>  
<me:PotentialPoint angle="190" potential="10.0556650"/>  
<me:PotentialPoint angle="195" potential=" 9.4780550"/>  
<me:PotentialPoint angle="200" potential=" 8.6641500"/>  
<me:PotentialPoint angle="205" potential=" 7.6664600"/>  
<me:PotentialPoint angle="210" potential=" 6.5112400"/>  
<me:PotentialPoint angle="215" potential=" 5.3035100"/>  
<me:PotentialPoint angle="220" potential=" 4.0695250"/>  
<me:PotentialPoint angle="225" potential=" 2.8880500"/>

```
<me:PotentialPoint angle="230" potential=" 1.8378500"/>
<me:PotentialPoint angle="235" potential=" 0.9976900"/>
<me:PotentialPoint angle="240" potential=" 0.3675700"/>
<me:PotentialPoint angle="245" potential=" 0.0525100"/>
<me:PotentialPoint angle="250" potential=" 0.0525100"/>
<me:PotentialPoint angle="255" potential=" 0.3938250"/>
<me:PotentialPoint angle="260" potential=" 1.0764550"/>
<me:PotentialPoint angle="265" potential=" 2.0741450"/>
<me:PotentialPoint angle="270" potential=" 3.3343850"/>
<me:PotentialPoint angle="275" potential=" 4.7521550"/>
<me:PotentialPoint angle="280" potential=" 6.2486900"/>
<me:PotentialPoint angle="285" potential=" 7.6664600"/>
<me:PotentialPoint angle="290" potential=" 8.8741900"/>
<me:PotentialPoint angle="295" potential=" 9.7668600"/>
<me:PotentialPoint angle="300" potential="10.2919600"/>
<me:PotentialPoint angle="305" potential="10.3969800"/>
<me:PotentialPoint angle="310" potential="10.0819200"/>
<me:PotentialPoint angle="315" potential=" 9.3730350"/>
<me:PotentialPoint angle="320" potential=" 8.2965800"/>
<me:PotentialPoint angle="325" potential=" 6.9575750"/>
<me:PotentialPoint angle="330" potential=" 5.4872950"/>
<me:PotentialPoint angle="335" potential=" 4.0170150"/>
<me:PotentialPoint angle="340" potential=" 2.6780100"/>
<me:PotentialPoint angle="345" potential=" 1.5227900"/>
<me:PotentialPoint angle="350" potential=" 0.6826300"/>
<me:PotentialPoint angle="355" potential=" 0.1837850"/>
    </me:HinderedRotorPotential>
    <me:periodicity>3</me:periodicity>
</me:ExtraDOSMethod>

<me:DistributionCalcMethod name="Boltzmann" />
```

```
<me:energyTransferModel xsi:type="me:ExponentialDown">
  <me:deltaEDown units="cm-1" referenceTemperature="298.0" >91.422</me:deltaEDown>
  <me:deltaEDownTExponent referenceTemperature="298.0" >0.995832</me:deltaEDownTExponent>
</me:energyTransferModel>
</molecule>
```

```
<molecule id="TS1" spinMultiplicity="1">
  <atomArray>
    <atom id="a1" elementType="C" x3="-0.532695" y3="-1.203782" z3="0.512627" />
    <atom id="a2" elementType="C" spinMultiplicity="2" x3="0.045791" y3="0.123850" z3="0.195019" />
    <atom id="a3" elementType="O" x3="1.014966" y3="0.502187" z3="0.964041" />
    <atom id="a4" elementType="O" spinMultiplicity="2" x3="1.337155" y3="1.825212" z3="0.705651" />
    <atom id="a5" elementType="H" x3="0.124868" y3="1.993062" z3="0.109444" />
    <atom id="a6" elementType="C" x3="-0.430606" y3="1.105136" z3="-0.693445" />
    <atom id="a7" elementType="H" x3="-0.319179" y3="-1.906486" z3="-0.294081" />
    <atom id="a8" elementType="H" x3="-1.617030" y3="-1.115003" z3="0.588676" />
    <atom id="a9" elementType="H" x3="-0.127080" y3="-1.586957" z3="1.446695" />
    <atom id="a10" elementType="H" x3="-1.427735" y3="0.951650" z3="-1.087740" />
    <atom id="a11" elementType="H" x3="0.289665" y3="1.453258" z3="-1.434613" />
  </atomArray>
  <bondArray>
    <bond id="b1" atomRefs2="a11 a6" order="1" />
    <bond id="b2" atomRefs2="a10 a6" order="1" />
    <bond id="b3" atomRefs2="a6 a5" order="1" />
    <bond id="b4" atomRefs2="a6 a2" order="1" />
    <bond id="b5" atomRefs2="a7 a1" order="1" />
    <bond id="b6" atomRefs2="a2 a1" order="1" />
    <bond id="b7" atomRefs2="a2 a3" order="1" />
    <bond id="b8" atomRefs2="a1 a8" order="1" />
    <bond id="b9" atomRefs2="a1 a9" order="1" />
    <bond id="b10" atomRefs2="a4 a3" order="1" />
  </bondArray>
</molecule>
```



```

</bondArray>
<propertyList>
  <property title="program">
    <scalar>Gaussian 16, Revision B.01</scalar>
  </property>
  <property title="basis">
    <scalar>def2TZVP (5D, 7F)</scalar>
  </property>
  <property title="method">
    <scalar>mn15</scalar>
  </property>
  <property title="File Format">
    <scalar>g03</scalar>
  </property>
  <property title="Energy" dictRef="me:ZPE">
    <scalar units="kJ/mol">64.52</scalar>
  </property>
  <property title="Vibrational Frequencies" dictRef="me:vibFreqs">
    <array units="cm-1">276.84 350.89 512.21 540.50 666.78 752.37 853.07 942.55 976.46 990.73
1046.09 1080.57 1329.04 1374.07 1412.86 1449.53 1455.90 1524.29 1564.70 1882.56 3080.58 3119.60
3152.24 3186.63 3227.71</array>
  </property>
  <property title="ImaginaryFrequency" dictRef="me:imFreqs">
    <scalar units="cm-1">1582.87</scalar>
  </property>
  <property title="Rotational Constants" dictRef="me:rotConsts">
    <array units="cm-1">0.328 0.148 0.106</array>
  </property>
  <property title="Symmetry Number" dictRef="me:symmetryNumber">
    <scalar>1</scalar>
  </property>
  <property dictRef="me:frequenciesScaleFactor">

```

```
<scalar>0.993</scalar>
</property>
</propertyList>
<me:DOSCMMethod name="QMRotors" />
```

```
<!-- Frequency 120.02 has been eliminated in favour of a 1 dimensional hindered rotor. 1-2
Dihedral Me rotation -->
```

```
<me:ExtraDOSCMMethod xsi:type="me:HinderedRotorQM1D">
  <me:bondRef>b6</me:bondRef>
  <me:HinderedRotorPotential format="numerical" units="kJ/mol" expansionSize="10"
UseSineTerms="yes">
  <me:PotentialPoint angle="0" potential=" 0.0000000"/>
  <me:PotentialPoint angle="10" potential=" 0.2100400"/>
  <me:PotentialPoint angle="20" potential=" 0.7613950"/>
  <me:PotentialPoint angle="30" potential=" 1.6015550"/>
  <me:PotentialPoint angle="40" potential=" 2.4679700"/>
  <me:PotentialPoint angle="50" potential=" 3.1768550"/>
  <me:PotentialPoint angle="60" potential=" 3.4919150"/>
  <me:PotentialPoint angle="70" potential=" 3.3081300"/>
  <me:PotentialPoint angle="80" potential=" 2.7042650"/>
  <me:PotentialPoint angle="90" potential=" 1.8378500"/>
  <me:PotentialPoint angle="100" potential=" 0.9451800"/>
  <me:PotentialPoint angle="110" potential=" 0.2888050"/>
  <me:PotentialPoint angle="120" potential=" 0.0000000"/>
  <me:PotentialPoint angle="130" potential=" 0.1837850"/>
  <me:PotentialPoint angle="140" potential=" 0.7876500"/>
  <me:PotentialPoint angle="150" potential=" 1.6803200"/>
  <me:PotentialPoint angle="160" potential=" 2.5992450"/>
  <me:PotentialPoint angle="170" potential=" 3.2556200"/>
  <me:PotentialPoint angle="180" potential=" 3.4919150"/>
  <me:PotentialPoint angle="190" potential=" 3.2031100"/>
  <me:PotentialPoint angle="200" potential=" 2.5467350"/>
```

```

<me:PotentialPoint angle="210" potential=" 1.7065750"/>
<me:PotentialPoint angle="220" potential=" 0.8926700"/>
<me:PotentialPoint angle="230" potential=" 0.2888050"/>
<me:PotentialPoint angle="240" potential=" 0.0000000"/>
<me:PotentialPoint angle="250" potential=" 0.1050200"/>
<me:PotentialPoint angle="260" potential=" 0.6038650"/>
<me:PotentialPoint angle="270" potential=" 1.4440250"/>
<me:PotentialPoint angle="280" potential=" 2.3892050"/>
<me:PotentialPoint angle="290" potential=" 3.1506000"/>
<me:PotentialPoint angle="300" potential=" 3.4919150"/>
<me:PotentialPoint angle="310" potential=" 3.2293650"/>
<me:PotentialPoint angle="320" potential=" 2.5204800"/>
<me:PotentialPoint angle="330" potential=" 1.6015550"/>
<me:PotentialPoint angle="340" potential=" 0.7613950"/>
<me:PotentialPoint angle="350" potential=" 0.1837850"/>
    </me:HinderedRotorPotential>
    <me:periodicity>3</me:periodicity>
</me:ExtraDOSCMETHOD>
</molecule>

    <molecule id="TS2" spinMultiplicity="1">
    <atomArray>
    <atom id="a1" elementType="C" x3="1.379709" y3="0.661901" z3="-0.575399" />
    <atom id="a2" elementType="C" x3="0.989507" y3="0.453877" z3="-2.008828" />
    <atom id="a3" elementType="O" x3="0.934339" y3="-0.717029" z3="-2.485448" />
    <atom id="a4" elementType="O" spinMultiplicity="2" x3="-1.029996" y3="-0.439044" z3="-2.477970"
/>
    <atom id="a5" elementType="H" x3="-1.800648" y3="-1.042528" z3="-2.500191" />
    <atom id="a6" elementType="C" spinMultiplicity="2" x3="0.405873" y3="1.448269" z3="-2.788379" />
    <atom id="a7" elementType="H" x3="2.320258" y3="0.154847" z3="-0.365336" />
    <atom id="a8" elementType="H" x3="0.607767" y3="0.219126" z3="0.056652" />

```

```
<atom id="a9" elementType="H" x3="1.479033" y3="1.718941" z3="-0.331667" />
<atom id="a10" elementType="H" x3="0.223755" y3="2.444437" z3="-2.404682" />
<atom id="a11" elementType="H" x3="0.136577" y3="1.211227" z3="-3.806334" />
</atomArray>
<bondArray>
  <bond id="b1" atomRefs2="a11 a6" order="1" />
  <bond id="b2" atomRefs2="a6 a10" order="1" />
  <bond id="b3" atomRefs2="a6 a2" order="1" />
  <bond id="b4" atomRefs2="a5 a4" order="1" />
  <bond id="b5" atomRefs2="a3 a2" order="2" />
  <bond id="b6" atomRefs2="a2 a1" order="1" />
  <bond id="b7" atomRefs2="a1 a7" order="1" />
  <bond id="b8" atomRefs2="a1 a9" order="1" />
  <bond id="b9" atomRefs2="a1 a8" order="1" />
</bondArray>
<propertyList>
  <property title="program">
    <scalar>Gaussian 16, Revision C.01</scalar>
  </property>
  <property title="basis">
    <scalar>def2TZVP (5D, 7F)</scalar>
  </property>
  <property title="method">
    <scalar>mn15</scalar>
  </property>
  <property title="File Format">
    <scalar>g03</scalar>
  </property>
  <property title="Energy" dictRef="me:ZPE">
    <scalar units="kJ/mol" >17.57</scalar>
  </property>
```

```

<property title="Vibrational Frequencies" dictRef="me:vibFreqs">
  <array units="cm-1">135.36 357.21 377.81 391.75 492.75 537.51 621.01 864.48 896.78 969.01
980.34 1033.74 1060.89 1339.40 1386.60 1453.24 1465.70 1490.97 1535.58 3076.87 3157.11 3173.01
3200.16 3324.62 3696.20</array>
</property>
<property title="ImaginaryFrequency" dictRef="me:imFreqs">
  <scalar units="cm-1">587.55</scalar>
</property>
<property title="Rotational Constants" dictRef="me:rotConsts">
  <array units="cm-1">0.241 0.138 0.119</array>
</property>
<property title="Symmetry Number" dictRef="me:symmetryNumber">
  <scalar>1</scalar>
</property>
<property dictRef="me:frequenciesScaleFactor">
  <scalar>0.993</scalar>
</property>
</propertyList>
<me:DOSCMMethod name="QMRotors" />

```

<!-- Frequency 116.19 has been eliminated in favour of a 1 dimensional hindered rotor. 1-2  
Dihedral Me rotation -->

```

<me:ExtraDOSCMMethod xsi:type="me:HinderedRotorQM1D">
  <me:bondRef>b6</me:bondRef>
  <me:HinderedRotorPotential format="numerical" units="kJ/mol" expansionSize="10"
UseSineTerms="yes">
  <me:PotentialPoint angle="0" potential=" 0.000000"/>
  <me:PotentialPoint angle="5" potential="-0.6826300"/>
  <me:PotentialPoint angle="10" potential="-1.1814750"/>
  <me:PotentialPoint angle="15" potential="-1.5227900"/>
  <me:PotentialPoint angle="20" potential="-1.6803200"/>
  <me:PotentialPoint angle="25" potential="-1.6278100"/>

```

<me:PotentialPoint angle="30" potential="-1.4177700"/>  
<me:PotentialPoint angle="35" potential="-0.9976900"/>  
<me:PotentialPoint angle="40" potential="-0.4463350"/>  
<me:PotentialPoint angle="45" potential=" 0.2888050"/>  
<me:PotentialPoint angle="50" potential=" 1.1027100"/>  
<me:PotentialPoint angle="55" potential=" 1.9953800"/>  
<me:PotentialPoint angle="60" potential=" 2.9143050"/>  
<me:PotentialPoint angle="65" potential=" 3.7807200"/>  
<me:PotentialPoint angle="70" potential=" 4.4896050"/>  
<me:PotentialPoint angle="75" potential=" 5.0147050"/>  
<me:PotentialPoint angle="80" potential=" 5.2510000"/>  
<me:PotentialPoint angle="85" potential=" 5.1984900"/>  
<me:PotentialPoint angle="90" potential=" 4.8834300"/>  
<me:PotentialPoint angle="95" potential=" 4.3058200"/>  
<me:PotentialPoint angle="100" potential=" 3.5444250"/>  
<me:PotentialPoint angle="105" potential=" 2.6517550"/>  
<me:PotentialPoint angle="110" potential=" 1.7590850"/>  
<me:PotentialPoint angle="115" potential=" 0.8664150"/>  
<me:PotentialPoint angle="120" potential=" 0.0787650"/>  
<me:PotentialPoint angle="125" potential="-0.6038650"/>  
<me:PotentialPoint angle="130" potential="-1.1289650"/>  
<me:PotentialPoint angle="135" potential="-1.4965350"/>  
<me:PotentialPoint angle="140" potential="-1.6540650"/>  
<me:PotentialPoint angle="145" potential="-1.6540650"/>  
<me:PotentialPoint angle="150" potential="-1.4440250"/>  
<me:PotentialPoint angle="155" potential="-1.0239450"/>  
<me:PotentialPoint angle="160" potential="-0.4725900"/>  
<me:PotentialPoint angle="165" potential=" 0.2362950"/>  
<me:PotentialPoint angle="170" potential=" 1.0764550"/>  
<me:PotentialPoint angle="175" potential=" 1.9691250"/>  
<me:PotentialPoint angle="180" potential=" 2.8880500"/>

<me:PotentialPoint angle="185" potential=" 3.7282100"/>  
<me:PotentialPoint angle="190" potential=" 4.4633500"/>  
<me:PotentialPoint angle="195" potential=" 4.9884500"/>  
<me:PotentialPoint angle="200" potential=" 5.2510000"/>  
<me:PotentialPoint angle="205" potential=" 5.2247450"/>  
<me:PotentialPoint angle="210" potential=" 4.9096850"/>  
<me:PotentialPoint angle="215" potential=" 4.3320750"/>  
<me:PotentialPoint angle="220" potential=" 3.5706800"/>  
<me:PotentialPoint angle="225" potential=" 2.7042650"/>  
<me:PotentialPoint angle="230" potential=" 1.8115950"/>  
<me:PotentialPoint angle="235" potential=" 0.9189250"/>  
<me:PotentialPoint angle="240" potential=" 0.1312750"/>  
<me:PotentialPoint angle="245" potential="-0.5513550"/>  
<me:PotentialPoint angle="250" potential="-1.1027100"/>  
<me:PotentialPoint angle="255" potential="-1.4702800"/>  
<me:PotentialPoint angle="260" potential="-1.6540650"/>  
<me:PotentialPoint angle="265" potential="-1.6540650"/>  
<me:PotentialPoint angle="270" potential="-1.4702800"/>  
<me:PotentialPoint angle="275" potential="-1.1027100"/>  
<me:PotentialPoint angle="280" potential="-0.5513550"/>  
<me:PotentialPoint angle="285" potential=" 0.1312750"/>  
<me:PotentialPoint angle="290" potential=" 0.9451800"/>  
<me:PotentialPoint angle="295" potential=" 1.8641050"/>  
<me:PotentialPoint angle="300" potential=" 2.7830300"/>  
<me:PotentialPoint angle="305" potential=" 3.6757000"/>  
<me:PotentialPoint angle="310" potential=" 4.4108400"/>  
<me:PotentialPoint angle="315" potential=" 4.9621950"/>  
<me:PotentialPoint angle="320" potential=" 5.2510000"/>  
<me:PotentialPoint angle="325" potential=" 5.1984900"/>  
<me:PotentialPoint angle="330" potential=" 4.8834300"/>  
<me:PotentialPoint angle="335" potential=" 4.2795650"/>

```
<me:PotentialPoint angle="340" potential=" 3.4919150"/>
<me:PotentialPoint angle="345" potential=" 2.5992450"/>
<me:PotentialPoint angle="350" potential=" 1.6803200"/>
<me:PotentialPoint angle="355" potential=" 0.7876500"/>
    </me:HinderedRotorPotential>
    <me:periodicity>3</me:periodicity>
</me:ExtraDOSCMETHOD>
```

```
</molecule>
```

```
</moleculeList>
```

```
<reactionList>
```

```
<reaction id="R1" reversible="true">
  <reactantList>
    <reactant>
      <molecule ref="Me2COO" role="modelled" />
    </reactant>
  </reactantList>
  <productList>
    <product>
      <molecule ref="Methyl-VHP" role="modelled" />
    </product>
  </productList>
  <me:transitionState>
    <molecule ref="TS1" role="transitionState" />
  </me:transitionState>
    <me:tunneling name="Eckart" />
  <me:MCRCMethod name="RRKM" />
</reaction>
```



```

    <reaction id="R2">
<reactantList>
  <reactant>
    <molecule ref="Methyl-VHP" role="modelled" />
  </reactant>
</reactantList>
<productList>
  <product>
    <molecule ref="Methyl-vinoxy" role="sink" />
  </product>
  <product>
    <molecule ref="OH" role="sink" />
  </product>
</productList>
<me:transitionState>
  <molecule ref="TS2" role="transitionState" />
</me:transitionState>
<me:MCRCMethod name="RRKM" />
</reaction>

</reactionList>

<me:conditions>

<me:bathGas>He</me:bathGas>

<me:PTs>

  <me:PTpair units="Torr" P="5.0" T="296" precision="qd" bathGas="He" >
  <me:experimentalRate ref1="Me2COO" ref2="Me2COO" error="12">466</me:experimentalRate>

```

```

</me:PTpair>
<me:PTpair units="Torr" P="10.0" T="296" precision="qd" bathGas="He" >
  <me:experimentalRate ref1="Me2COO" ref2="Me2COO" error="14">546</me:experimentalRate>
</me:PTpair>
<me:PTpair units="Torr" P="50.0" T="296" precision="qd" bathGas="He" >
  <me:experimentalRate ref1="Me2COO" ref2="Me2COO" error="7">704</me:experimentalRate>
</me:PTpair>
<me:PTpair units="Torr" P="100.0" T="296" precision="qd" bathGas="He" >
  <me:experimentalRate ref1="Me2COO" ref2="Me2COO" error="11">802</me:experimentalRate>
</me:PTpair>
<me:PTpair units="Torr" P="200.0" T="296" precision="qd" bathGas="He" >
  <me:experimentalRate ref1="Me2COO" ref2="Me2COO" error="11">851</me:experimentalRate>
</me:PTpair>

<me:PTpair units="Torr" P="5.23" T="310" precision="qd" bathGas="He" >
  <me:experimentalRate ref1="Me2COO" ref2="Me2COO"
error="17">784</me:experimentalRate>
</me:PTpair>
<me:PTpair units="Torr" P="10.47" T="310" precision="qd" bathGas="He" >
  <me:experimentalRate ref1="Me2COO" ref2="Me2COO" error="30">889</me:experimentalRate>
</me:PTpair>
<me:PTpair units="Torr" P="52.3" T="310" precision="qd" bathGas="He" >
  <me:experimentalRate ref1="Me2COO" ref2="Me2COO" error="15">1325</me:experimentalRate>
</me:PTpair>
<me:PTpair units="Torr" P="104.8" T="310" precision="qd" bathGas="He" >
  <me:experimentalRate ref1="Me2COO" ref2="Me2COO" error="27">1392</me:experimentalRate>
</me:PTpair>
<me:PTpair units="Torr" P="209.5" T="310" precision="qd" bathGas="He" >
  <me:experimentalRate ref1="Me2COO" ref2="Me2COO" error="81">1556</me:experimentalRate>
</me:PTpair>

```

```
<me:PTpair units="Torr" P="5.45" T="323" precision="qd" bathGas="He" >
  <me:experimentalRate ref1="Me2COO" ref2="Me2COO" error="90">1068</me:experimentalRate>
</me:PTpair>
<me:PTpair units="Torr" P="10.9" T="323" precision="qd" bathGas="He" >
  <me:experimentalRate ref1="Me2COO" ref2="Me2COO" error="74">1529</me:experimentalRate>
</me:PTpair>
<me:PTpair units="Torr" P="54.5" T="323" precision="qd" bathGas="He" >
  <me:experimentalRate ref1="Me2COO" ref2="Me2COO" error="25">2317</me:experimentalRate>
</me:PTpair>
<me:PTpair units="Torr" P="109.0" T="323" precision="qd" bathGas="He" >
  <me:experimentalRate ref1="Me2COO" ref2="Me2COO" error="22">2465</me:experimentalRate>
</me:PTpair>
```

```
<me:PTpair units="Torr" P="5.57" T="330" precision="qd" bathGas="He" >
  <me:experimentalRate ref1="Me2COO" ref2="Me2COO" error="12">1466</me:experimentalRate>
</me:PTpair>
<me:PTpair units="Torr" P="11.15" T="330" precision="qd" bathGas="He" >
  <me:experimentalRate ref1="Me2COO" ref2="Me2COO" error="61">2004</me:experimentalRate>
</me:PTpair>
<me:PTpair units="Torr" P="55.6" T="330" precision="qd" bathGas="He" >
  <me:experimentalRate ref1="Me2COO" ref2="Me2COO" error="42">3315</me:experimentalRate>
</me:PTpair>
```

```
<me:PTpair units="Torr" P="111.5" T="330" precision="qd" bathGas="He" >
  <me:experimentalRate ref1="Me2COO" ref2="Me2COO" error="75">3309</me:experimentalRate>
</me:PTpair>
```

```
<me:PTpair units="Torr" P="5.75" T="340" precision="qd" bathGas="He" >
  <me:experimentalRate ref1="Me2COO" ref2="Me2COO" error="52">1560</me:experimentalRate>
</me:PTpair>
<me:PTpair units="Torr" P="11.74" T="340" precision="qd" bathGas="He" >
  <me:experimentalRate ref1="Me2COO" ref2="Me2COO" error="13">2941</me:experimentalRate>
```

</me:PTpair>

<me:PTpair units="Torr" P="57.5" T="340" precision="qd" bathGas="He" >

<me:experimentalRate ref1="Me2COO" ref2="Me2COO" error="211">4394</me:experimentalRate>

</me:PTpair>

</me:PTs>

<me:InitialPopulation>

<me:molecule ref="Me2COO" me:population="1.0" />

</me:InitialPopulation>

</me:conditions>

<me:modelParameters>

<me:grainSize units="cm-1">60</me:grainSize>

<me:energyAboveTheTopHill>25.0</me:energyAboveTheTopHill>

</me:modelParameters>

<me:control>

<me:printSpeciesProfile />

<me:eigenvalues>3</me:eigenvalues>

<me:calcMethod name="simpleCalc" />

<!--<me:calcMethod xsi:type="me:marquardt">

<me:MarquardtIterations>20</me:MarquardtIterations>

<me:MarquardtTolerance>0.01</me:MarquardtTolerance>

<me:MarquardtDerivDelta>1.e-03</me:MarquardtDerivDelta>

</me:calcMethod-->

</me:control>

<metadataList xmlns:dc="http://purl.org/dc/elements/1.1/">

<dc:title>Project name</dc:title>

```
<dc:source>CH32COO-test.xml</dc:source>
<dc:creator>Mesmer v5.2</dc:creator>
<dc:date>20200118_112216</dc:date>
<dc:contributor>praseal</dc:contributor>
</metadataList>
</me:mesmer>
```

## **N<sub>2</sub> bath gas**

```
<?xml version="1.0" encoding="utf-8" ?>
<?xml-stylesheet type='text/xsl' href='.././mesmer2.xsl' media='other'?>
<?xml-stylesheet type='text/xsl' href='.././mesmer1.xsl' media='screen'?>
```

```
<me:mesmer xmlns="http://www.xml-cml.org/schema"
xmlns:me="http://www.chem.leeds.ac.uk/mesmer" xmlns:xsi="http://www.w3.org/2001/XMLSchema-
instance">
```

```
<me:title>Project name</me:title>
```

```
<moleculeList convention="">
```

```
  <molecule id="N2">
```

```
    <atomArray>
```

```
      <atom id="a1" elementType="N" />
```

```
      <atom id="a2" elementType="N" />
```

```
    </atomArray>
```

```
    <bondArray>
```

```
      <bond atomRefs2="a2 a1" order="3"/>
```

```
    </bondArray>
```

```
    <propertyList>
```

```
      <property dictRef="me:epsilon">
```

```
        <scalar>48.0</scalar>
```

```
      </property>
```

```
      <property dictRef="me:sigma">
```

```
        <scalar>3.90</scalar>
```

```
      </property>
```

```
      <property dictRef="me:MW">
```

```
        <scalar units="amu">28.0</scalar>
```

```
      </property>
```

```
    </propertyList>
```

```
  </molecule>
```

```
    <molecule id="OH" spinMultiplicity="2">
```

```
      <atomArray>
```

```
        <atom id="a1" elementType="O" spinMultiplicity="2" x3="0.772188" y3="-1.028683" z3="-1.079052"
```

```
      />
```

```
        <atom id="a2" elementType="H" x3="1.058651" y3="-1.784301" z3="-1.627078" />
```

```

</atomArray>
<bondArray>
  <bond atomRefs2="a2 a1" order="1" />
</bondArray>
<propertyList>
  <property title="program">
    <scalar>Gaussian 16, Revision C.01</scalar>
  </property>
  <property title="basis">
    <scalar>def2TZVP (5D, 7F)</scalar>
  </property>
  <property title="method">
    <scalar>mn15</scalar>
  </property>
  <property title="File Format">
    <scalar>g03</scalar>
  </property>
  <property title="Energy" dictRef="me:ZPE">
    <scalar units="kJ/mol" >0</scalar>
  </property>
  <property title="SpinMultiplicity" dictRef="me:spinMultiplicity">
    <scalar>2.00</scalar>
  </property>
  <property title="Vibrational Frequencies" dictRef="me:vibFreqs">
    <array units="cm-1">3762.87</array>
  </property>
  <property title="Rotational Constants" dictRef="me:rotConsts">
    <array units="cm-1">18.638</array>
  </property>
  <property title="Symmetry Number" dictRef="me:symmetryNumber">
    <scalar>1</scalar>

```

```

</property>
      <property dictRef="me:frequenciesScaleFactor">
        <scalar>0.993</scalar>
      </property>
</propertyList>
      <me:DOSCMMethod name="QMRotors" />
</molecule>

  <molecule id="Methyl-vinoxy" spinMultiplicity="2">
<atomArray>
  <atom id="a1" elementType="C" x3="1.377768" y3="0.656098" z3="-0.588781" />
  <atom id="a2" elementType="C" x3="1.050787" y3="0.416179" z3="-2.043330" />
  <atom id="a3" elementType="O" x3="1.430425" y3="-0.596608" z3="-2.628385" />
  <atom id="a4" elementType="C" spinMultiplicity="2" x3="0.278079" y3="1.407261" z3="-2.737943" />
  <atom id="a5" elementType="H" x3="1.960840" y3="-0.177513" z3="-0.206049" />
  <atom id="a6" elementType="H" x3="0.461158" y3="0.760829" z3="-0.005239" />
  <atom id="a7" elementType="H" x3="1.944099" y3="1.582331" z3="-0.474469" />
  <atom id="a8" elementType="H" x3="-0.067716" y3="2.305648" z3="-2.247202" />
  <atom id="a9" elementType="H" x3="0.041377" y3="1.241371" z3="-3.778023" />
</atomArray>
<bondArray>
  <bond id="b1" atomRefs2="a9 a4" order="1" />
  <bond id="b2" atomRefs2="a4 a8" order="1" />
  <bond id="b3" atomRefs2="a4 a2" order="1" />
  <bond id="b4" atomRefs2="a3 a2" order="2" />
  <bond id="b5" atomRefs2="a2 a1" order="1" />
  <bond id="b6" atomRefs2="a1 a7" order="1" />
  <bond id="b7" atomRefs2="a1 a5" order="1" />
  <bond id="b8" atomRefs2="a1 a6" order="1" />
</bondArray>
<propertyList>

```



```

<property title="program">
  <scalar>Gaussian 16, Revision C.01</scalar>
</property>
<property title="basis">
  <scalar>def2TZVP (5D, 7F)</scalar>
</property>
<property title="method">
  <scalar>mn15</scalar>
</property>
<property title="File Format">
  <scalar>g03</scalar>
</property>
<property title="Energy" dictRef="me:ZPE">
  <scalar units="kJ/mol" >11.83</scalar>
</property>
<property title="SpinMultiplicity" dictRef="me:spinMultiplicity">
  <scalar>2.00</scalar>
</property>
<property title="Vibrational Frequencies" dictRef="me:vibFreqs">
  <array units="cm-1">366.32 506.50 515.00 761.64 835.02 921.67 1015.23 1051.99 1278.18 1383.00
1445.47 1460.13 1462.34 1647.86 3072.68 3141.58 3192.41 3194.24 3312.48</array>
</property>
<property title="Rotational Constants" dictRef="me:rotConsts">
  <array units="cm-1">0.367 0.305 0.172</array>
</property>
<property title="Symmetry Number" dictRef="me:symmetryNumber">
  <scalar>1</scalar>
</property>
      <property dictRef="me:frequenciesScaleFactor">
        <scalar>0.993</scalar>
      </property>

```

</propertyList>

<me:DOSCMMethod name="QMRotors" />

<!-- Frequency 61.67 has been eliminated in favour of a 1 dimensional hindered rotor. 1-2  
Dihedral Me rotation -->

<me:ExtraDOSCMMethod xsi:type="me:HinderedRotorQM1D">

<me:bondRef>b5</me:bondRef>

<me:HinderedRotorPotential format="numerical" units="kJ/mol" expansionSize="10"  
UseSineTerms="yes">

<me:PotentialPoint angle="0" potential=" 0.000000"/>

<me:PotentialPoint angle="5" potential=" 0.000000"/>

<me:PotentialPoint angle="10" potential=" 0.0525100"/>

<me:PotentialPoint angle="15" potential=" 0.1312750"/>

<me:PotentialPoint angle="20" potential=" 0.2100400"/>

<me:PotentialPoint angle="25" potential=" 0.3150600"/>

<me:PotentialPoint angle="30" potential=" 0.4200800"/>

<me:PotentialPoint angle="35" potential=" 0.4988450"/>

<me:PotentialPoint angle="40" potential=" 0.6038650"/>

<me:PotentialPoint angle="45" potential=" 0.6563750"/>

<me:PotentialPoint angle="50" potential=" 0.7088850"/>

<me:PotentialPoint angle="55" potential=" 0.7351400"/>

<me:PotentialPoint angle="60" potential=" 0.7351400"/>

<me:PotentialPoint angle="65" potential=" 0.7351400"/>

<me:PotentialPoint angle="70" potential=" 0.6826300"/>

<me:PotentialPoint angle="75" potential=" 0.6301200"/>

<me:PotentialPoint angle="80" potential=" 0.5513550"/>

<me:PotentialPoint angle="85" potential=" 0.4725900"/>

<me:PotentialPoint angle="90" potential=" 0.3675700"/>

<me:PotentialPoint angle="95" potential=" 0.2888050"/>

<me:PotentialPoint angle="100" potential=" 0.1837850"/>

<me:PotentialPoint angle="105" potential=" 0.1050200"/>

<me:PotentialPoint angle="110" potential=" 0.0525100"/>

<me:PotentialPoint angle="115" potential=" 0.0000000"/>  
<me:PotentialPoint angle="120" potential=" 0.0000000"/>  
<me:PotentialPoint angle="125" potential=" 0.0000000"/>  
<me:PotentialPoint angle="130" potential=" 0.0262550"/>  
<me:PotentialPoint angle="135" potential=" 0.1050200"/>  
<me:PotentialPoint angle="140" potential=" 0.1837850"/>  
<me:PotentialPoint angle="145" potential=" 0.2625500"/>  
<me:PotentialPoint angle="150" potential=" 0.3675700"/>  
<me:PotentialPoint angle="155" potential=" 0.4725900"/>  
<me:PotentialPoint angle="160" potential=" 0.5513550"/>  
<me:PotentialPoint angle="165" potential=" 0.6301200"/>  
<me:PotentialPoint angle="170" potential=" 0.6826300"/>  
<me:PotentialPoint angle="175" potential=" 0.7351400"/>  
<me:PotentialPoint angle="180" potential=" 0.7351400"/>  
<me:PotentialPoint angle="185" potential=" 0.7351400"/>  
<me:PotentialPoint angle="190" potential=" 0.7088850"/>  
<me:PotentialPoint angle="195" potential=" 0.6301200"/>  
<me:PotentialPoint angle="200" potential=" 0.5513550"/>  
<me:PotentialPoint angle="205" potential=" 0.4725900"/>  
<me:PotentialPoint angle="210" potential=" 0.3675700"/>  
<me:PotentialPoint angle="215" potential=" 0.2625500"/>  
<me:PotentialPoint angle="220" potential=" 0.1837850"/>  
<me:PotentialPoint angle="225" potential=" 0.1050200"/>  
<me:PotentialPoint angle="230" potential=" 0.0262550"/>  
<me:PotentialPoint angle="235" potential=" 0.0000000"/>  
<me:PotentialPoint angle="240" potential=" 0.0000000"/>  
<me:PotentialPoint angle="245" potential=" 0.0000000"/>  
<me:PotentialPoint angle="250" potential=" 0.0525100"/>  
<me:PotentialPoint angle="255" potential=" 0.1050200"/>  
<me:PotentialPoint angle="260" potential=" 0.1837850"/>  
<me:PotentialPoint angle="265" potential=" 0.2888050"/>

```

<me:PotentialPoint angle="270" potential=" 0.3675700"/>
<me:PotentialPoint angle="275" potential=" 0.4725900"/>
<me:PotentialPoint angle="280" potential=" 0.5513550"/>
<me:PotentialPoint angle="285" potential=" 0.6301200"/>
<me:PotentialPoint angle="290" potential=" 0.6826300"/>
<me:PotentialPoint angle="295" potential=" 0.7351400"/>
<me:PotentialPoint angle="300" potential=" 0.7351400"/>
<me:PotentialPoint angle="305" potential=" 0.7351400"/>
<me:PotentialPoint angle="310" potential=" 0.7088850"/>
<me:PotentialPoint angle="315" potential=" 0.6563750"/>
<me:PotentialPoint angle="320" potential=" 0.6038650"/>
<me:PotentialPoint angle="325" potential=" 0.5251000"/>
<me:PotentialPoint angle="330" potential=" 0.4200800"/>
<me:PotentialPoint angle="335" potential=" 0.3150600"/>
<me:PotentialPoint angle="340" potential=" 0.2100400"/>
<me:PotentialPoint angle="345" potential=" 0.1312750"/>
<me:PotentialPoint angle="350" potential=" 0.0525100"/>
<me:PotentialPoint angle="355" potential=" 0.0000000"/>
</me:HinderedRotorPotential>

```

```

<me:periodicity>3</me:periodicity>

```

```

</me:ExtraDOSCMETHOD>

```

<!-- Frequency 372.51 has been eliminated in favour of a 1 dimensional hindered rotor. 2-4 Dihedral rotation -->

```

<me:ExtraDOSCMETHOD xsi:type="me:HinderedRotorQM1D">

```

```

<me:bondRef>b3</me:bondRef>

```

```

<me:HinderedRotorPotential format="numerical" units="kJ/mol" expansionSize="10"
UseSineTerms="yes">

```

```

<me:PotentialPoint angle="0" potential=" 0.0000000"/>

```

```

<me:PotentialPoint angle="5" potential=" 0.1837850"/>

```

```

<me:PotentialPoint angle="10" potential=" 0.7351400"/>

```

```

<me:PotentialPoint angle="15" potential=" 1.6803200"/>

```

<me:PotentialPoint angle="20" potential=" 2.9668150"/>  
<me:PotentialPoint angle="25" potential=" 4.5946250"/>  
<me:PotentialPoint angle="30" potential=" 6.5374950"/>  
<me:PotentialPoint angle="35" potential=" 8.8216800"/>  
<me:PotentialPoint angle="40" potential="11.3684150"/>  
<me:PotentialPoint angle="45" potential="14.1514450"/>  
<me:PotentialPoint angle="50" potential="17.1445150"/>  
<me:PotentialPoint angle="55" potential="20.2951150"/>  
<me:PotentialPoint angle="60" potential="23.5769900"/>  
<me:PotentialPoint angle="65" potential="26.8851200"/>  
<me:PotentialPoint angle="70" potential="30.1932500"/>  
<me:PotentialPoint angle="75" potential="33.3963600"/>  
<me:PotentialPoint angle="80" potential="36.4156850"/>  
<me:PotentialPoint angle="85" potential="39.1462050"/>  
<me:PotentialPoint angle="90" potential="41.4041350"/>  
<me:PotentialPoint angle="95" potential="41.9292350"/>  
<me:PotentialPoint angle="100" potential="39.6975600"/>  
<me:PotentialPoint angle="105" potential="36.9932950"/>  
<me:PotentialPoint angle="110" potential="33.9739700"/>  
<me:PotentialPoint angle="115" potential="30.7183500"/>  
<me:PotentialPoint angle="120" potential="27.3314550"/>  
<me:PotentialPoint angle="125" potential="23.8920500"/>  
<me:PotentialPoint angle="130" potential="20.4263900"/>  
<me:PotentialPoint angle="135" potential="17.0657500"/>  
<me:PotentialPoint angle="140" potential="13.8363850"/>  
<me:PotentialPoint angle="145" potential="10.8170600"/>  
<me:PotentialPoint angle="150" potential=" 8.0602850"/>  
<me:PotentialPoint angle="155" potential=" 5.6448250"/>  
<me:PotentialPoint angle="160" potential=" 3.6231900"/>  
<me:PotentialPoint angle="165" potential=" 2.0478900"/>  
<me:PotentialPoint angle="170" potential=" 0.8926700"/>

<me:PotentialPoint angle="175" potential=" 0.2100400"/>  
<me:PotentialPoint angle="180" potential=" 0.0000000"/>  
<me:PotentialPoint angle="185" potential=" 0.2100400"/>  
<me:PotentialPoint angle="190" potential=" 0.8926700"/>  
<me:PotentialPoint angle="195" potential=" 2.0216350"/>  
<me:PotentialPoint angle="200" potential=" 3.6231900"/>  
<me:PotentialPoint angle="205" potential=" 5.6448250"/>  
<me:PotentialPoint angle="210" potential=" 8.0602850"/>  
<me:PotentialPoint angle="215" potential="10.7908050"/>  
<me:PotentialPoint angle="220" potential="13.8101300"/>  
<me:PotentialPoint angle="225" potential="17.0394950"/>  
<me:PotentialPoint angle="230" potential="20.4263900"/>  
<me:PotentialPoint angle="235" potential="23.8657950"/>  
<me:PotentialPoint angle="240" potential="27.3314550"/>  
<me:PotentialPoint angle="245" potential="30.7183500"/>  
<me:PotentialPoint angle="250" potential="33.9477150"/>  
<me:PotentialPoint angle="255" potential="36.9670400"/>  
<me:PotentialPoint angle="260" potential="39.6713050"/>  
<me:PotentialPoint angle="265" potential="41.9292350"/>  
<me:PotentialPoint angle="270" potential="41.4303900"/>  
<me:PotentialPoint angle="275" potential="39.1724600"/>  
<me:PotentialPoint angle="280" potential="36.4419400"/>  
<me:PotentialPoint angle="285" potential="33.4226150"/>  
<me:PotentialPoint angle="290" potential="30.2195050"/>  
<me:PotentialPoint angle="295" potential="26.9113750"/>  
<me:PotentialPoint angle="300" potential="23.5769900"/>  
<me:PotentialPoint angle="305" potential="20.3213700"/>  
<me:PotentialPoint angle="310" potential="17.1707700"/>  
<me:PotentialPoint angle="315" potential="14.1777000"/>  
<me:PotentialPoint angle="320" potential="11.3684150"/>  
<me:PotentialPoint angle="325" potential=" 8.8216800"/>

```
<me:PotentialPoint angle="330" potential=" 6.5637500"/>
<me:PotentialPoint angle="335" potential=" 4.5946250"/>
<me:PotentialPoint angle="340" potential=" 2.9668150"/>
<me:PotentialPoint angle="345" potential=" 1.6803200"/>
<me:PotentialPoint angle="350" potential=" 0.7351400"/>
<me:PotentialPoint angle="355" potential=" 0.1837850"/>
</me:HinderedRotorPotential>
    <me:periodicity>2</me:periodicity>
</me:ExtraDOSCMETHOD>
```

```
</molecule>
```

```
<molecule id="Methyl-VHP" spinMultiplicity="1">
```

```
<atomArray>
```

```
<atom id="a1" elementType="C" x3="0.999549" y3="-0.184259" z3="-0.162252" />
<atom id="a2" elementType="C" x3="0.581386" y3="0.294677" z3="-1.511105" />
<atom id="a3" elementType="O" x3="-0.205025" y3="-0.550839" z3="-2.260355" />
<atom id="a4" elementType="O" x3="-1.118524" y3="-1.238050" z3="-1.412596" />
<atom id="a5" elementType="H" x3="-0.935999" y3="-2.158799" z3="-1.650821" />
<atom id="a6" elementType="C" x3="0.964317" y3="1.424289" z3="-2.095127" />
<atom id="a7" elementType="H" x3="1.408704" y3="-1.194846" z3="-0.223044" />
<atom id="a8" elementType="H" x3="0.154251" y3="-0.212273" z3="0.524041" />
<atom id="a9" elementType="H" x3="1.758898" y3="0.484382" z3="0.238211" />
<atom id="a10" elementType="H" x3="1.686148" y3="2.067042" z3="-1.613136" />
<atom id="a11" elementType="H" x3="0.584989" y3="1.698077" z3="-3.069557" />
```

```
</atomArray>
```

```
<bondArray>
```

```
<bond id="b1" atomRefs2="a11 a6" order="1" />
<bond id="b2" atomRefs2="a3 a2" order="1" />
<bond id="b3" atomRefs2="a3 a4" order="1" />
<bond id="b4" atomRefs2="a6 a10" order="1" />
```

```

<bond id="b5" atomRefs2="a6 a2" order="2" />
<bond id="b6" atomRefs2="a5 a4" order="1" />
<bond id="b7" atomRefs2="a2 a1" order="1" />
<bond id="b8" atomRefs2="a7 a1" order="1" />
<bond id="b9" atomRefs2="a1 a9" order="1" />
<bond id="b10" atomRefs2="a1 a8" order="1" />
</bondArray>
<propertyList>
  <property title="program">
    <scalar>Gaussian 16, Revision B.01</scalar>
  </property>
  <property title="basis">
    <scalar>def2TZVP (5D, 7F)</scalar>
  </property>
  <property title="method">
    <scalar>mn15</scalar>
  </property>
  <property title="File Format">
    <scalar>g03</scalar>
  </property>
  <property title="Energy" dictRef="me:ZPE">
    <scalar units="kJ/mol">-59.75</scalar>
  </property>
  <property title="Vibrational Frequencies" dictRef="me:vibFreqs">
    <array units="cm-1">320.84 405.42 473.58 563.31 734.32 851.24 884.42 932.61 1011.07 1039.60
1057.79 1293.11 1384.43 1395.31 1421.69 1455.80 1471.65 1742.32 3076.48 3149.68 3179.16 3201.43
3299.93 3831.03</array>
  </property>
  <property title="Rotational Constants" dictRef="me:rotConsts">
    <array units="cm-1">0.285 0.148 0.103</array>
  </property>
  <property title="Symmetry Number" dictRef="me:symmetryNumber">

```



```

    <scalar>1</scalar>
  </property>
  <property dictRef="me:sigma" >
    <scalar>4.46</scalar>
  </property>
  <property dictRef="me:epsilon" >
    <scalar>382.7</scalar>
  </property>
  <property dictRef="me:frequenciesScaleFactor">
    <scalar>0.993</scalar>
  </property>
</propertyList>

```

```

<me:DOSCMMethod name="QMRotors" />

```

<!-- Frequency 221.84 has been eliminated in favour of a 1 dimensional hindered rotor. 1-2 Dihedral Me rotation -->

```

    <me:ExtraDOSCMMethod xsi:type="me:HinderedRotorQM1D">
      <me:bondRef>b7</me:bondRef>
      <me:HinderedRotorPotential format="numerical" units="kJ/mol" expansionSize="10"
      UseSineTerms="yes">
        <me:PotentialPoint angle="0" potential=" 0.0000000"/>
        <me:PotentialPoint angle="5" potential=" 0.1837850"/>
        <me:PotentialPoint angle="10" potential=" 0.7088850"/>
        <me:PotentialPoint angle="15" potential=" 1.4965350"/>
        <me:PotentialPoint angle="20" potential=" 2.5204800"/>
        <me:PotentialPoint angle="25" potential=" 3.6494450"/>
        <me:PotentialPoint angle="30" potential=" 4.8571750"/>
        <me:PotentialPoint angle="35" potential=" 6.0386500"/>
        <me:PotentialPoint angle="40" potential=" 7.1938700"/>
        <me:PotentialPoint angle="45" potential=" 8.2178150"/>
        <me:PotentialPoint angle="50" potential=" 9.0842300"/>
      </me:HinderedRotorPotential>
    </me:ExtraDOSCMMethod>

```

<me:PotentialPoint angle="55" potential=" 9.6880950"/>  
<me:PotentialPoint angle="60" potential="10.0031550"/>  
<me:PotentialPoint angle="65" potential=" 9.9769000"/>  
<me:PotentialPoint angle="70" potential=" 9.6093300"/>  
<me:PotentialPoint angle="75" potential=" 8.9004450"/>  
<me:PotentialPoint angle="80" potential=" 7.9290100"/>  
<me:PotentialPoint angle="85" potential=" 6.7212800"/>  
<me:PotentialPoint angle="90" potential=" 5.3822750"/>  
<me:PotentialPoint angle="95" potential=" 4.0170150"/>  
<me:PotentialPoint angle="100" potential=" 2.7305200"/>  
<me:PotentialPoint angle="105" potential=" 1.6278100"/>  
<me:PotentialPoint angle="110" potential=" 0.7613950"/>  
<me:PotentialPoint angle="115" potential=" 0.2100400"/>  
<me:PotentialPoint angle="120" potential=" 0.0000000"/>  
<me:PotentialPoint angle="125" potential=" 0.1837850"/>  
<me:PotentialPoint angle="130" potential=" 0.7088850"/>  
<me:PotentialPoint angle="135" potential=" 1.5227900"/>  
<me:PotentialPoint angle="140" potential=" 2.5729900"/>  
<me:PotentialPoint angle="145" potential=" 3.7019550"/>  
<me:PotentialPoint angle="150" potential=" 4.9096850"/>  
<me:PotentialPoint angle="155" potential=" 6.0911600"/>  
<me:PotentialPoint angle="160" potential=" 7.2463800"/>  
<me:PotentialPoint angle="165" potential=" 8.2703250"/>  
<me:PotentialPoint angle="170" potential=" 9.1104850"/>  
<me:PotentialPoint angle="175" potential=" 9.7143500"/>  
<me:PotentialPoint angle="180" potential="10.0031550"/>  
<me:PotentialPoint angle="185" potential=" 9.9769000"/>  
<me:PotentialPoint angle="190" potential=" 9.5830750"/>  
<me:PotentialPoint angle="195" potential=" 8.9004450"/>  
<me:PotentialPoint angle="200" potential=" 7.9027550"/>  
<me:PotentialPoint angle="205" potential=" 6.6950250"/>

<me:PotentialPoint angle="210" potential=" 5.3822750"/>  
<me:PotentialPoint angle="215" potential=" 4.0432700"/>  
<me:PotentialPoint angle="220" potential=" 2.7830300"/>  
<me:PotentialPoint angle="225" potential=" 1.6540650"/>  
<me:PotentialPoint angle="230" potential=" 0.7876500"/>  
<me:PotentialPoint angle="235" potential=" 0.2362950"/>  
<me:PotentialPoint angle="240" potential=" 0.0000000"/>  
<me:PotentialPoint angle="245" potential=" 0.1575300"/>  
<me:PotentialPoint angle="250" potential=" 0.6301200"/>  
<me:PotentialPoint angle="255" potential=" 1.4440250"/>  
<me:PotentialPoint angle="260" potential=" 2.4679700"/>  
<me:PotentialPoint angle="265" potential=" 3.6231900"/>  
<me:PotentialPoint angle="270" potential=" 4.8309200"/>  
<me:PotentialPoint angle="275" potential=" 6.0386500"/>  
<me:PotentialPoint angle="280" potential=" 7.1938700"/>  
<me:PotentialPoint angle="285" potential=" 8.2440700"/>  
<me:PotentialPoint angle="290" potential=" 9.0842300"/>  
<me:PotentialPoint angle="295" potential=" 9.7143500"/>  
<me:PotentialPoint angle="300" potential="10.0031550"/>  
<me:PotentialPoint angle="305" potential=" 9.9769000"/>  
<me:PotentialPoint angle="310" potential=" 9.5830750"/>  
<me:PotentialPoint angle="315" potential=" 8.8479350"/>  
<me:PotentialPoint angle="320" potential=" 7.8502450"/>  
<me:PotentialPoint angle="325" potential=" 6.6162600"/>  
<me:PotentialPoint angle="330" potential=" 5.2772550"/>  
<me:PotentialPoint angle="335" potential=" 3.9119950"/>  
<me:PotentialPoint angle="340" potential=" 2.6517550"/>  
<me:PotentialPoint angle="345" potential=" 1.5490450"/>  
<me:PotentialPoint angle="350" potential=" 0.7088850"/>  
<me:PotentialPoint angle="355" potential=" 0.1837850"/>  
</me:HinderedRotorPotential>

<me:periodicity>3</me:periodicity>

</me:ExtraDOSCMETHOD>

<!-- Frequency 90.10 has been eliminated in favour of a 1 dimensional hindered rotor. 2-3  
Dihedral rotation -->

<me:ExtraDOSCMETHOD xsi:type="me:HinderedRotorQM1D">

<me:bondRef>b2</me:bondRef>

<me:HinderedRotorPotential format="numerical" units="kJ/mol" expansionSize="10"  
UseSineTerms="yes">

<me:PotentialPoint angle="0" potential=" 0.000000"/>

<me:PotentialPoint angle="5" potential=" 0.105020"/>

<me:PotentialPoint angle="10" potential=" 0.472590"/>

<me:PotentialPoint angle="15" potential=" 1.102710"/>

<me:PotentialPoint angle="20" potential=" 2.021635"/>

<me:PotentialPoint angle="25" potential=" 3.203110"/>

<me:PotentialPoint angle="30" potential=" 4.647135"/>

<me:PotentialPoint angle="35" potential=" 6.301200"/>

<me:PotentialPoint angle="40" potential=" 8.139050"/>

<me:PotentialPoint angle="45" potential=" 10.108175"/>

<me:PotentialPoint angle="50" potential=" 12.051045"/>

<me:PotentialPoint angle="55" potential=" 13.862640"/>

<me:PotentialPoint angle="60" potential=" 15.385430"/>

<me:PotentialPoint angle="65" potential=" 16.435630"/>

<me:PotentialPoint angle="70" potential=" 16.934475"/>

<me:PotentialPoint angle="75" potential=" 16.776945"/>

<me:PotentialPoint angle="80" potential=" 15.936785"/>

<me:PotentialPoint angle="85" potential=" 14.466505"/>

<me:PotentialPoint angle="90" potential=" 12.418615"/>

<me:PotentialPoint angle="95" potential=" 9.924390"/>

<me:PotentialPoint angle="100" potential=" 7.115105"/>

<me:PotentialPoint angle="105" potential=" 4.122035"/>

<me:PotentialPoint angle="110" potential=" 1.076455"/>

<me:PotentialPoint angle="115" potential="-1.864105"/>  
<me:PotentialPoint angle="120" potential="-4.568370"/>  
<me:PotentialPoint angle="125" potential="-6.905065"/>  
<me:PotentialPoint angle="130" potential="-8.821680"/>  
<me:PotentialPoint angle="135" potential="-10.186940"/>  
<me:PotentialPoint angle="140" potential="-11.000845"/>  
<me:PotentialPoint angle="145" potential="-11.237140"/>  
<me:PotentialPoint angle="150" potential="-10.895825"/>  
<me:PotentialPoint angle="155" potential="-10.003155"/>  
<me:PotentialPoint angle="160" potential="-8.559130"/>  
<me:PotentialPoint angle="165" potential="-6.616260"/>  
<me:PotentialPoint angle="170" potential="-4.253310"/>  
<me:PotentialPoint angle="175" potential="-1.575300"/>  
<me:PotentialPoint angle="180" potential=" 1.339005"/>  
<me:PotentialPoint angle="185" potential=" 4.358330"/>  
<me:PotentialPoint angle="190" potential=" 7.298890"/>  
<me:PotentialPoint angle="195" potential=" 10.081920"/>  
<me:PotentialPoint angle="200" potential=" 12.471125"/>  
<me:PotentialPoint angle="205" potential=" 14.361485"/>  
<me:PotentialPoint angle="210" potential=" 15.569215"/>  
<me:PotentialPoint angle="215" potential=" 16.015550"/>  
<me:PotentialPoint angle="220" potential=" 15.621725"/>  
<me:PotentialPoint angle="225" potential=" 14.519015"/>  
<me:PotentialPoint angle="230" potential=" 12.943715"/>  
<me:PotentialPoint angle="235" potential=" 11.027100"/>  
<me:PotentialPoint angle="240" potential=" 9.005465"/>  
<me:PotentialPoint angle="245" potential=" 7.010085"/>  
<me:PotentialPoint angle="250" potential=" 5.172235"/>  
<me:PotentialPoint angle="255" potential=" 3.570680"/>  
<me:PotentialPoint angle="260" potential=" 2.257930"/>  
<me:PotentialPoint angle="265" potential=" 1.207730"/>

```

<me:PotentialPoint angle="270" potential=" 0.420080"/>
<me:PotentialPoint angle="275" potential=" -0.183785"/>
<me:PotentialPoint angle="280" potential=" -0.551355"/>
<me:PotentialPoint angle="285" potential=" -0.708885"/>
<me:PotentialPoint angle="290" potential=" -0.630120"/>
<me:PotentialPoint angle="295" potential=" -0.367570"/>
<me:PotentialPoint angle="300" potential=" 0.000000"/>
<me:PotentialPoint angle="305" potential=" 0.472590"/>
<me:PotentialPoint angle="310" potential=" 0.892670"/>
<me:PotentialPoint angle="315" potential=" 1.286495"/>
<me:PotentialPoint angle="320" potential=" 1.522790"/>
<me:PotentialPoint angle="325" potential=" 1.627810"/>
<me:PotentialPoint angle="330" potential=" 1.549045"/>
<me:PotentialPoint angle="335" potential=" 1.339005"/>
<me:PotentialPoint angle="340" potential=" 1.050200"/>
<me:PotentialPoint angle="345" potential=" 0.682630"/>
<me:PotentialPoint angle="350" potential=" 0.341315"/>
<me:PotentialPoint angle="355" potential=" 0.105020"/>
    </me:HinderedRotorPotential>
</me:ExtraDOSCMETHOD>

```

<!-- Frequency 182.72 has been eliminated in favour of a 1 dimensional hindered rotor. 3-4  
Dihedral rotation -->

```

<me:ExtraDOSCMETHOD xsi:type="me:HinderedRotorQM1D">
  <me:bondRef>b3</me:bondRef>
  <me:HinderedRotorPotential format="numerical" units="kJ/mol" expansionSize="10"
  UseSineTerms="yes">
    <me:PotentialPoint angle="0" potential=" 0.0000000"/>
<me:PotentialPoint angle="5" potential=" 0.0525100"/>
<me:PotentialPoint angle="10" potential=" 0.1575300"/>
<me:PotentialPoint angle="15" potential=" 0.3938250"/>
<me:PotentialPoint angle="20" potential=" 0.7088850"/>

```

<me:PotentialPoint angle="25" potential=" 1.1552200"/>  
<me:PotentialPoint angle="30" potential=" 1.7328300"/>  
<me:PotentialPoint angle="35" potential=" 2.4417150"/>  
<me:PotentialPoint angle="40" potential=" 3.3343850"/>  
<me:PotentialPoint angle="45" potential=" 4.4108400"/>  
<me:PotentialPoint angle="50" potential=" 5.6448250"/>  
<me:PotentialPoint angle="55" potential=" 7.0625950"/>  
<me:PotentialPoint angle="60" potential=" 8.6641500"/>  
<me:PotentialPoint angle="65" potential="10.3969800"/>  
<me:PotentialPoint angle="70" potential="12.2610850"/>  
<me:PotentialPoint angle="75" potential="14.2039550"/>  
<me:PotentialPoint angle="80" potential="16.1468250"/>  
<me:PotentialPoint angle="85" potential="18.0896950"/>  
<me:PotentialPoint angle="90" potential="19.8750350"/>  
<me:PotentialPoint angle="95" potential="21.4765900"/>  
<me:PotentialPoint angle="100" potential="22.8418500"/>  
<me:PotentialPoint angle="105" potential="23.9183050"/>  
<me:PotentialPoint angle="110" potential="24.7059550"/>  
<me:PotentialPoint angle="115" potential="25.2048000"/>  
<me:PotentialPoint angle="120" potential="25.3623300"/>  
<me:PotentialPoint angle="125" potential="25.2048000"/>  
<me:PotentialPoint angle="130" potential="24.7584650"/>  
<me:PotentialPoint angle="135" potential="23.9708150"/>  
<me:PotentialPoint angle="140" potential="22.8681050"/>  
<me:PotentialPoint angle="145" potential="21.4765900"/>  
<me:PotentialPoint angle="150" potential="19.8225250"/>  
<me:PotentialPoint angle="155" potential="17.9321650"/>  
<me:PotentialPoint angle="160" potential="15.8842750"/>  
<me:PotentialPoint angle="165" potential="13.7838750"/>  
<me:PotentialPoint angle="170" potential="11.7359850"/>  
<me:PotentialPoint angle="175" potential=" 9.7406050"/>

<me:PotentialPoint angle="180" potential=" 7.9027550"/>  
<me:PotentialPoint angle="185" potential=" 6.1961800"/>  
<me:PotentialPoint angle="190" potential=" 4.6996450"/>  
<me:PotentialPoint angle="195" potential=" 3.3606400"/>  
<me:PotentialPoint angle="200" potential=" 2.2316750"/>  
<me:PotentialPoint angle="205" potential=" 1.2864950"/>  
<me:PotentialPoint angle="210" potential=" 0.5513550"/>  
<me:PotentialPoint angle="215" potential=" 0.0000000"/>  
<me:PotentialPoint angle="220" potential="-0.3938250"/>  
<me:PotentialPoint angle="225" potential="-0.6301200"/>  
<me:PotentialPoint angle="230" potential="-0.7088850"/>  
<me:PotentialPoint angle="235" potential="-0.6563750"/>  
<me:PotentialPoint angle="240" potential="-0.5251000"/>  
<me:PotentialPoint angle="245" potential="-0.2888050"/>  
<me:PotentialPoint angle="250" potential=" 0.0000000"/>  
<me:PotentialPoint angle="255" potential=" 0.3150600"/>  
<me:PotentialPoint angle="260" potential=" 0.6301200"/>  
<me:PotentialPoint angle="265" potential=" 0.9451800"/>  
<me:PotentialPoint angle="270" potential=" 1.2602400"/>  
<me:PotentialPoint angle="275" potential=" 1.4965350"/>  
<me:PotentialPoint angle="280" potential=" 1.7065750"/>  
<me:PotentialPoint angle="285" potential=" 1.8641050"/>  
<me:PotentialPoint angle="290" potential=" 1.9691250"/>  
<me:PotentialPoint angle="295" potential=" 1.9953800"/>  
<me:PotentialPoint angle="300" potential=" 1.9691250"/>  
<me:PotentialPoint angle="305" potential=" 1.8903600"/>  
<me:PotentialPoint angle="310" potential=" 1.7590850"/>  
<me:PotentialPoint angle="315" potential=" 1.6015550"/>  
<me:PotentialPoint angle="320" potential=" 1.3915150"/>  
<me:PotentialPoint angle="325" potential=" 1.1814750"/>  
<me:PotentialPoint angle="330" potential=" 0.9451800"/>



```

<me:PotentialPoint angle="335" potential=" 0.7088850"/>
<me:PotentialPoint angle="340" potential=" 0.4725900"/>
<me:PotentialPoint angle="345" potential=" 0.2888050"/>
<me:PotentialPoint angle="350" potential=" 0.1312750"/>
<me:PotentialPoint angle="355" potential=" 0.0262550"/>
    </me:HinderedRotorPotential>
</me:ExtraDOSCMETHOD>

<me:DistributionCalcMethod name="Boltzmann" />
<me:energyTransferModel xsi:type="me:ExponentialDown">
    <me:deltaEDown units="cm-1" referenceTemperature="298.0" >212.427</me:deltaEDown>
    <me:deltaEDownTExponent referenceTemperature="298.0" >0.704807</me:deltaEDownTExponent>
</me:energyTransferModel>
</molecule>

<molecule id="Me2COO" spinMultiplicity="1" >
    <atomArray>
        <atom id="a1" elementType="C" x3="0.514438" y3="-0.513304" z3="-1.328675" />
        <atom id="a2" elementType="C" spinMultiplicity="2" x3="0.431297" y3="-0.097242" z3="0.077740" />
        <atom id="a3" elementType="O" spinMultiplicity="2" x3="-1.694385" y3="0.420841" z3="-0.371211"
/>
        <atom id="a4" elementType="O" x3="-0.659943" y3="0.353551" z3="0.512236" />
        <atom id="a5" elementType="C" x3="1.553234" y3="-0.168112" z3="1.043778" />
        <atom id="a6" elementType="H" x3="0.222831" y3="0.334188" z3="-1.955976" />
        <atom id="a7" elementType="H" x3="-0.260557" y3="-1.263359" z3="-1.511936" />
        <atom id="a8" elementType="H" x3="1.504744" y3="-0.883405" z3="-1.582214" />
        <atom id="a9" elementType="H" x3="2.394878" y3="0.426040" z3="0.680803" />
        <atom id="a10" elementType="H" x3="1.240334" y3="0.197314" z3="2.018853" />
        <atom id="a11" elementType="H" x3="1.903553" y3="-1.198934" z3="1.132145" />
    </atomArray>
    <bondArray>

```

```

<bond id="b1" atomRefs2="a6 a1" order="1" />
<bond id="b2" atomRefs2="a8 a1" order="1" />
<bond id="b3" atomRefs2="a7 a1" order="1" />
<bond id="b4" atomRefs2="a1 a2" order="1" />
<bond id="b5" atomRefs2="a3 a4" order="1" />
<bond id="b6" atomRefs2="a2 a4" order="1" />
<bond id="b7" atomRefs2="a2 a5" order="1" />
<bond id="b8" atomRefs2="a9 a5" order="1" />
<bond id="b9" atomRefs2="a5 a11" order="1" />
<bond id="b10" atomRefs2="a5 a10" order="1" />
</bondArray>
<propertyList>
  <property title="program">
    <scalar>Gaussian 16, Revision B.01</scalar>
  </property>
  <property title="basis">
    <scalar>def2TZVP (5D, 7F)</scalar>
  </property>
  <property title="method">
    <scalar>mn15</scalar>
  </property>
  <property title="File Format">
    <scalar>g03</scalar>
  </property>
  <property title="Energy" dictRef="me:ZPE">
    <scalar units="kJ/mol" >0</scalar>
  </property>
  <property title="Vibrational Frequencies" dictRef="me:vibFreqs">
    <array units="cm-1">285.98 319.85 347.62 481.07 599.97 824.08 911.44 949.81 972.69 1069.13
1081.19 1304.79 1376.88 1397.45 1415.37 1448.25 1452.94 1472.80 1628.10 3059.86 3068.96 3114.37
3131.24 3190.16 3191.84</array>
  </property>

```

```

<property title="Rotational Constants" dictRef="me:rotConsts">
  <array units="cm-1">0.299 0.146 0.102</array>
</property>
<property title="Symmetry Number" dictRef="me:symmetryNumber">
  <scalar>1</scalar>
</property>
<property dictRef="me:sigma" >
  <scalar>4.46</scalar>
</property>
<property dictRef="me:epsilon" >
  <scalar>382.7</scalar>
</property>
<property dictRef="me:frequenciesScaleFactor">
  <scalar>0.993</scalar>
</property>
</propertyList>
<me:DOSCMMethod name="QMRotors" />

```

<!-- Frequency 162.06 has been eliminated in favour of a 1 dimensional hindered rotor. 2-5 Dihedral Me rotation -->

```

<me:ExtraDOSCMMethod xsi:type="me:HinderedRotorQM1D">
  <me:bondRef>b7</me:bondRef>
  <me:HinderedRotorPotential format="numerical" units="kJ/mol" expansionSize="10"
  UseSineTerms="yes">
    <me:PotentialPoint angle="0" potential=" 0.0000000"/>
    <me:PotentialPoint angle="5" potential=" 0.1050200"/>
    <me:PotentialPoint angle="10" potential=" 0.3938250"/>
    <me:PotentialPoint angle="15" potential=" 0.8401600"/>
    <me:PotentialPoint angle="20" potential=" 1.4440250"/>
    <me:PotentialPoint angle="25" potential=" 2.1529100"/>
    <me:PotentialPoint angle="30" potential=" 2.9668150"/>
    <me:PotentialPoint angle="35" potential=" 3.8332300"/>

```

<me:PotentialPoint angle="40" potential=" 4.6733900"/>  
<me:PotentialPoint angle="45" potential=" 5.4347850"/>  
<me:PotentialPoint angle="50" potential=" 6.0911600"/>  
<me:PotentialPoint angle="55" potential=" 6.5374950"/>  
<me:PotentialPoint angle="60" potential=" 6.7737900"/>  
<me:PotentialPoint angle="65" potential=" 6.7475350"/>  
<me:PotentialPoint angle="70" potential=" 6.4587300"/>  
<me:PotentialPoint angle="75" potential=" 5.9598850"/>  
<me:PotentialPoint angle="80" potential=" 5.2510000"/>  
<me:PotentialPoint angle="85" potential=" 4.4370950"/>  
<me:PotentialPoint angle="90" potential=" 3.5444250"/>  
<me:PotentialPoint angle="95" potential=" 2.6517550"/>  
<me:PotentialPoint angle="100" potential=" 1.8115950"/>  
<me:PotentialPoint angle="105" potential=" 1.1027100"/>  
<me:PotentialPoint angle="110" potential=" 0.5513550"/>  
<me:PotentialPoint angle="115" potential=" 0.1837850"/>  
<me:PotentialPoint angle="120" potential=" 0.0000000"/>  
<me:PotentialPoint angle="125" potential=" 0.0787650"/>  
<me:PotentialPoint angle="130" potential=" 0.3413150"/>  
<me:PotentialPoint angle="135" potential=" 0.8139050"/>  
<me:PotentialPoint angle="140" potential=" 1.4440250"/>  
<me:PotentialPoint angle="145" potential=" 2.2316750"/>  
<me:PotentialPoint angle="150" potential=" 3.0980900"/>  
<me:PotentialPoint angle="155" potential=" 3.9907600"/>  
<me:PotentialPoint angle="160" potential=" 4.8571750"/>  
<me:PotentialPoint angle="165" potential=" 5.6448250"/>  
<me:PotentialPoint angle="170" potential=" 6.2486900"/>  
<me:PotentialPoint angle="175" potential=" 6.6425150"/>  
<me:PotentialPoint angle="180" potential=" 6.8000450"/>  
<me:PotentialPoint angle="185" potential=" 6.6687700"/>  
<me:PotentialPoint angle="190" potential=" 6.3274550"/>

<me:PotentialPoint angle="195" potential=" 5.7761000"/>  
<me:PotentialPoint angle="200" potential=" 5.0409600"/>  
<me:PotentialPoint angle="205" potential=" 4.2270550"/>  
<me:PotentialPoint angle="210" potential=" 3.3868950"/>  
<me:PotentialPoint angle="215" potential=" 2.5467350"/>  
<me:PotentialPoint angle="220" potential=" 1.7590850"/>  
<me:PotentialPoint angle="225" potential=" 1.1027100"/>  
<me:PotentialPoint angle="230" potential=" 0.5776100"/>  
<me:PotentialPoint angle="235" potential=" 0.2100400"/>  
<me:PotentialPoint angle="240" potential=" 0.0262550"/>  
<me:PotentialPoint angle="245" potential=" 0.0262550"/>  
<me:PotentialPoint angle="250" potential=" 0.2362950"/>  
<me:PotentialPoint angle="255" potential=" 0.6038650"/>  
<me:PotentialPoint angle="260" potential=" 1.1552200"/>  
<me:PotentialPoint angle="265" potential=" 1.8641050"/>  
<me:PotentialPoint angle="270" potential=" 2.6780100"/>  
<me:PotentialPoint angle="275" potential=" 3.5706800"/>  
<me:PotentialPoint angle="280" potential=" 4.4896050"/>  
<me:PotentialPoint angle="285" potential=" 5.3297650"/>  
<me:PotentialPoint angle="290" potential=" 6.0649050"/>  
<me:PotentialPoint angle="295" potential=" 6.5637500"/>  
<me:PotentialPoint angle="300" potential=" 6.7737900"/>  
<me:PotentialPoint angle="305" potential=" 6.6950250"/>  
<me:PotentialPoint angle="310" potential=" 6.3274550"/>  
<me:PotentialPoint angle="315" potential=" 5.6973350"/>  
<me:PotentialPoint angle="320" potential=" 4.9096850"/>  
<me:PotentialPoint angle="325" potential=" 4.0170150"/>  
<me:PotentialPoint angle="330" potential=" 3.1243450"/>  
<me:PotentialPoint angle="335" potential=" 2.2579300"/>  
<me:PotentialPoint angle="340" potential=" 1.4965350"/>  
<me:PotentialPoint angle="345" potential=" 0.8664150"/>

<me:PotentialPoint angle="350" potential=" 0.3938250"/>

<me:PotentialPoint angle="355" potential=" 0.1050200"/>

</me:HinderedRotorPotential>

<me:periodicity>3</me:periodicity>

</me:ExtraDOSCMETHOD>

<!-- Frequency 216.14 has been eliminated in favour of a 1 dimensional hindered rotor. 1-2  
Dihedral Me rotation -->

<me:ExtraDOSCMETHOD xsi:type="me:HinderedRotorQM1D">

<me:bondRef>b4</me:bondRef>

<me:HinderedRotorPotential format="numerical" units="kJ/mol" expansionSize="10"  
UseSineTerms="yes">

<me:PotentialPoint angle="0" potential=" 0.0000000"/>

<me:PotentialPoint angle="5" potential=" 0.1837850"/>

<me:PotentialPoint angle="10" potential=" 0.6563750"/>

<me:PotentialPoint angle="15" potential=" 1.3915150"/>

<me:PotentialPoint angle="20" potential=" 2.3629500"/>

<me:PotentialPoint angle="25" potential=" 3.4919150"/>

<me:PotentialPoint angle="30" potential=" 4.6996450"/>

<me:PotentialPoint angle="35" potential=" 5.9336300"/>

<me:PotentialPoint angle="40" potential=" 7.1151050"/>

<me:PotentialPoint angle="45" potential=" 8.1915600"/>

<me:PotentialPoint angle="50" potential=" 9.1104850"/>

<me:PotentialPoint angle="55" potential=" 9.7931150"/>

<me:PotentialPoint angle="60" potential="10.2657050"/>

<me:PotentialPoint angle="65" potential="10.4232350"/>

<me:PotentialPoint angle="70" potential="10.2919600"/>

<me:PotentialPoint angle="75" potential=" 9.8193700"/>

<me:PotentialPoint angle="80" potential=" 9.0579750"/>

<me:PotentialPoint angle="85" potential=" 7.9815200"/>

<me:PotentialPoint angle="90" potential=" 6.7212800"/>

<me:PotentialPoint angle="95" potential=" 5.3035100"/>

<me:PotentialPoint angle="100" potential=" 3.8594850"/>  
<me:PotentialPoint angle="105" potential=" 2.5467350"/>  
<me:PotentialPoint angle="110" potential=" 1.4177700"/>  
<me:PotentialPoint angle="115" potential=" 0.5776100"/>  
<me:PotentialPoint angle="120" potential=" 0.1050200"/>  
<me:PotentialPoint angle="125" potential=" 0.0262550"/>  
<me:PotentialPoint angle="130" potential=" 0.3150600"/>  
<me:PotentialPoint angle="135" potential=" 0.9714350"/>  
<me:PotentialPoint angle="140" potential=" 1.9428700"/>  
<me:PotentialPoint angle="145" potential=" 3.2031100"/>  
<me:PotentialPoint angle="150" potential=" 4.5946250"/>  
<me:PotentialPoint angle="155" potential=" 6.0386500"/>  
<me:PotentialPoint angle="160" potential=" 7.3776550"/>  
<me:PotentialPoint angle="165" potential=" 8.5591300"/>  
<me:PotentialPoint angle="170" potential=" 9.4780550"/>  
<me:PotentialPoint angle="175" potential="10.0819200"/>  
<me:PotentialPoint angle="180" potential="10.3969800"/>  
<me:PotentialPoint angle="185" potential="10.3707250"/>  
<me:PotentialPoint angle="190" potential="10.0556650"/>  
<me:PotentialPoint angle="195" potential=" 9.4780550"/>  
<me:PotentialPoint angle="200" potential=" 8.6641500"/>  
<me:PotentialPoint angle="205" potential=" 7.6664600"/>  
<me:PotentialPoint angle="210" potential=" 6.5112400"/>  
<me:PotentialPoint angle="215" potential=" 5.3035100"/>  
<me:PotentialPoint angle="220" potential=" 4.0695250"/>  
<me:PotentialPoint angle="225" potential=" 2.8880500"/>  
<me:PotentialPoint angle="230" potential=" 1.8378500"/>  
<me:PotentialPoint angle="235" potential=" 0.9976900"/>  
<me:PotentialPoint angle="240" potential=" 0.3675700"/>  
<me:PotentialPoint angle="245" potential=" 0.0525100"/>  
<me:PotentialPoint angle="250" potential=" 0.0525100"/>

```

<me:PotentialPoint angle="255" potential=" 0.3938250"/>
<me:PotentialPoint angle="260" potential=" 1.0764550"/>
<me:PotentialPoint angle="265" potential=" 2.0741450"/>
<me:PotentialPoint angle="270" potential=" 3.3343850"/>
<me:PotentialPoint angle="275" potential=" 4.7521550"/>
<me:PotentialPoint angle="280" potential=" 6.2486900"/>
<me:PotentialPoint angle="285" potential=" 7.6664600"/>
<me:PotentialPoint angle="290" potential=" 8.8741900"/>
<me:PotentialPoint angle="295" potential=" 9.7668600"/>
<me:PotentialPoint angle="300" potential="10.2919600"/>
<me:PotentialPoint angle="305" potential="10.3969800"/>
<me:PotentialPoint angle="310" potential="10.0819200"/>
<me:PotentialPoint angle="315" potential=" 9.3730350"/>
<me:PotentialPoint angle="320" potential=" 8.2965800"/>
<me:PotentialPoint angle="325" potential=" 6.9575750"/>
<me:PotentialPoint angle="330" potential=" 5.4872950"/>
<me:PotentialPoint angle="335" potential=" 4.0170150"/>
<me:PotentialPoint angle="340" potential=" 2.6780100"/>
<me:PotentialPoint angle="345" potential=" 1.5227900"/>
<me:PotentialPoint angle="350" potential=" 0.6826300"/>
<me:PotentialPoint angle="355" potential=" 0.1837850"/>
    </me:HinderedRotorPotential>
    <me:periodicity>3</me:periodicity>
</me:ExtraDOSCMETHOD>

<me:DistributionCalcMethod name="Boltzmann" />
<me:energyTransferModel xsi:type="me:ExponentialDown">
  <me:deltaEDown units="cm-1" referenceTemperature="298.0" >212.427</me:deltaEDown>
  <me:deltaEDownTExponent referenceTemperature="298.0" >0.704807</me:deltaEDownTExponent>
</me:energyTransferModel>
</molecule>

```



```

<molecule id="TS1" spinMultiplicity="1">
  <atomArray>
    <atom id="a1" elementType="C" x3="-0.532695" y3="-1.203782" z3="0.512627" />
    <atom id="a2" elementType="C" spinMultiplicity="2" x3="0.045791" y3="0.123850" z3="0.195019" />
    <atom id="a3" elementType="O" x3="1.014966" y3="0.502187" z3="0.964041" />
    <atom id="a4" elementType="O" spinMultiplicity="2" x3="1.337155" y3="1.825212" z3="0.705651" />
    <atom id="a5" elementType="H" x3="0.124868" y3="1.993062" z3="0.109444" />
    <atom id="a6" elementType="C" x3="-0.430606" y3="1.105136" z3="-0.693445" />
    <atom id="a7" elementType="H" x3="-0.319179" y3="-1.906486" z3="-0.294081" />
    <atom id="a8" elementType="H" x3="-1.617030" y3="-1.115003" z3="0.588676" />
    <atom id="a9" elementType="H" x3="-0.127080" y3="-1.586957" z3="1.446695" />
    <atom id="a10" elementType="H" x3="-1.427735" y3="0.951650" z3="-1.087740" />
    <atom id="a11" elementType="H" x3="0.289665" y3="1.453258" z3="-1.434613" />
  </atomArray>
  <bondArray>
    <bond id="b1" atomRefs2="a11 a6" order="1" />
    <bond id="b2" atomRefs2="a10 a6" order="1" />
    <bond id="b3" atomRefs2="a6 a5" order="1" />
    <bond id="b4" atomRefs2="a6 a2" order="1" />
    <bond id="b5" atomRefs2="a7 a1" order="1" />
    <bond id="b6" atomRefs2="a2 a1" order="1" />
    <bond id="b7" atomRefs2="a2 a3" order="1" />
    <bond id="b8" atomRefs2="a1 a8" order="1" />
    <bond id="b9" atomRefs2="a1 a9" order="1" />
    <bond id="b10" atomRefs2="a4 a3" order="1" />
  </bondArray>
  <propertyList>
    <property title="program">
      <scalar>Gaussian 16, Revision B.01</scalar>
    </property>
  </propertyList>
</molecule>

```

```

<property title="basis">
  <scalar>def2TZVP (5D, 7F)</scalar>
</property>
<property title="method">
  <scalar>mn15</scalar>
</property>
<property title="File Format">
  <scalar>g03</scalar>
</property>
<property title="Energy" dictRef="me:ZPE">
  <scalar units="kJ/mol">64.67</scalar>
</property>
<property title="Vibrational Frequencies" dictRef="me:vibFreqs">
  <array units="cm-1">276.84 350.89 512.21 540.50 666.78 752.37 853.07 942.55 976.46 990.73
1046.09 1080.57 1329.04 1374.07 1412.86 1449.53 1455.90 1524.29 1564.70 1882.56 3080.58 3119.60
3152.24 3186.63 3227.71</array>
</property>
<property title="ImaginaryFrequency" dictRef="me:imFreqs">
  <scalar units="cm-1">1582.87</scalar>
</property>
<property title="Rotational Constants" dictRef="me:rotConsts">
  <array units="cm-1">0.328 0.148 0.106</array>
</property>
<property title="Symmetry Number" dictRef="me:symmetryNumber">
  <scalar>1</scalar>
</property>
<property dictRef="me:frequenciesScaleFactor">
  <scalar>0.993</scalar>
</property>
</propertyList>
<me:DOSCMMethod name="QMRotors" />

```

<!-- Frequency 120.02 has been eliminated in favour of a 1 dimensional hindered rotor. 1-2  
Dihedral Me rotation -->

```
<me:ExtraDOSMethod xsi:type="me:HinderedRotorQM1D">
```

```
<me:bondRef>b6</me:bondRef>
```

```
<me:HinderedRotorPotential format="numerical" units="kJ/mol" expansionSize="10"  
UseSineTerms="yes">
```

```
<me:PotentialPoint angle="0" potential=" 0.000000"/>
```

```
<me:PotentialPoint angle="10" potential=" 0.2100400"/>
```

```
<me:PotentialPoint angle="20" potential=" 0.7613950"/>
```

```
<me:PotentialPoint angle="30" potential=" 1.6015550"/>
```

```
<me:PotentialPoint angle="40" potential=" 2.4679700"/>
```

```
<me:PotentialPoint angle="50" potential=" 3.1768550"/>
```

```
<me:PotentialPoint angle="60" potential=" 3.4919150"/>
```

```
<me:PotentialPoint angle="70" potential=" 3.3081300"/>
```

```
<me:PotentialPoint angle="80" potential=" 2.7042650"/>
```

```
<me:PotentialPoint angle="90" potential=" 1.8378500"/>
```

```
<me:PotentialPoint angle="100" potential=" 0.9451800"/>
```

```
<me:PotentialPoint angle="110" potential=" 0.2888050"/>
```

```
<me:PotentialPoint angle="120" potential=" 0.0000000"/>
```

```
<me:PotentialPoint angle="130" potential=" 0.1837850"/>
```

```
<me:PotentialPoint angle="140" potential=" 0.7876500"/>
```

```
<me:PotentialPoint angle="150" potential=" 1.6803200"/>
```

```
<me:PotentialPoint angle="160" potential=" 2.5992450"/>
```

```
<me:PotentialPoint angle="170" potential=" 3.2556200"/>
```

```
<me:PotentialPoint angle="180" potential=" 3.4919150"/>
```

```
<me:PotentialPoint angle="190" potential=" 3.2031100"/>
```

```
<me:PotentialPoint angle="200" potential=" 2.5467350"/>
```

```
<me:PotentialPoint angle="210" potential=" 1.7065750"/>
```

```
<me:PotentialPoint angle="220" potential=" 0.8926700"/>
```

```
<me:PotentialPoint angle="230" potential=" 0.2888050"/>
```

```
<me:PotentialPoint angle="240" potential=" 0.0000000"/>
```

```
<me:PotentialPoint angle="250" potential=" 0.1050200"/>
```

```

<me:PotentialPoint angle="260" potential=" 0.6038650"/>
<me:PotentialPoint angle="270" potential=" 1.4440250"/>
<me:PotentialPoint angle="280" potential=" 2.3892050"/>
<me:PotentialPoint angle="290" potential=" 3.1506000"/>
<me:PotentialPoint angle="300" potential=" 3.4919150"/>
<me:PotentialPoint angle="310" potential=" 3.2293650"/>
<me:PotentialPoint angle="320" potential=" 2.5204800"/>
<me:PotentialPoint angle="330" potential=" 1.6015550"/>
<me:PotentialPoint angle="340" potential=" 0.7613950"/>
<me:PotentialPoint angle="350" potential=" 0.1837850"/>
    </me:HinderedRotorPotential>
    <me:periodicity>3</me:periodicity>
</me:ExtraDOSMethod>
</molecule>

```

```

    <molecule id="TS2" spinMultiplicity="1">
<atomArray>
    <atom id="a1" elementType="C" x3="1.379709" y3="0.661901" z3="-0.575399" />
    <atom id="a2" elementType="C" x3="0.989507" y3="0.453877" z3="-2.008828" />
    <atom id="a3" elementType="O" x3="0.934339" y3="-0.717029" z3="-2.485448" />
    <atom id="a4" elementType="O" spinMultiplicity="2" x3="-1.029996" y3="-0.439044" z3="-2.477970"
/>
    <atom id="a5" elementType="H" x3="-1.800648" y3="-1.042528" z3="-2.500191" />
    <atom id="a6" elementType="C" spinMultiplicity="2" x3="0.405873" y3="1.448269" z3="-2.788379" />
    <atom id="a7" elementType="H" x3="2.320258" y3="0.154847" z3="-0.365336" />
    <atom id="a8" elementType="H" x3="0.607767" y3="0.219126" z3="0.056652" />
    <atom id="a9" elementType="H" x3="1.479033" y3="1.718941" z3="-0.331667" />
    <atom id="a10" elementType="H" x3="0.223755" y3="2.444437" z3="-2.404682" />
    <atom id="a11" elementType="H" x3="0.136577" y3="1.211227" z3="-3.806334" />
</atomArray>
<bondArray>

```

```

<bond id="b1" atomRefs2="a11 a6" order="1" />
<bond id="b2" atomRefs2="a6 a10" order="1" />
<bond id="b3" atomRefs2="a6 a2" order="1" />
<bond id="b4" atomRefs2="a5 a4" order="1" />
<bond id="b5" atomRefs2="a3 a2" order="2" />
<bond id="b6" atomRefs2="a2 a1" order="1" />
<bond id="b7" atomRefs2="a1 a7" order="1" />
<bond id="b8" atomRefs2="a1 a9" order="1" />
<bond id="b9" atomRefs2="a1 a8" order="1" />
</bondArray>
<propertyList>
  <property title="program">
    <scalar>Gaussian 16, Revision C.01</scalar>
  </property>
  <property title="basis">
    <scalar>def2TZVP (5D, 7F)</scalar>
  </property>
  <property title="method">
    <scalar>mn15</scalar>
  </property>
  <property title="File Format">
    <scalar>g03</scalar>
  </property>
  <property title="Energy" dictRef="me:ZPE">
    <scalar units="kJ/mol" >17.57</scalar>
  </property>
  <property title="Vibrational Frequencies" dictRef="me:vibFreqs">
    <array units="cm-1">135.36 357.21 377.81 391.75 492.75 537.51 621.01 864.48 896.78 969.01
980.34 1033.74 1060.89 1339.40 1386.60 1453.24 1465.70 1490.97 1535.58 3076.87 3157.11 3173.01
3200.16 3324.62 3696.20</array>
  </property>
  <property title="ImaginaryFrequency" dictRef="me:imFreqs">

```

```

    <scalar units="cm-1">587.55</scalar>
  </property>
  <property title="Rotational Constants" dictRef="me:rotConsts">
    <array units="cm-1">0.241 0.138 0.119</array>
  </property>
  <property title="Symmetry Number" dictRef="me:symmetryNumber">
    <scalar>1</scalar>
  </property>
  <property dictRef="me:frequenciesScaleFactor">
    <scalar>0.993</scalar>
  </property>
</propertyList>
<me:DOSCMMethod name="QMRotors" />

```

<!-- Frequency 116.19 has been eliminated in favour of a 1 dimensional hindered rotor. 1-2  
Dihedral Me rotation -->

```

    <me:ExtraDOSCMMethod xsi:type="me:HinderedRotorQM1D">
      <me:bondRef>b6</me:bondRef>
      <me:HinderedRotorPotential format="numerical" units="kJ/mol" expansionSize="10"
UseSineTerms="yes">
<me:PotentialPoint angle="0" potential=" 0.000000"/>
<me:PotentialPoint angle="5" potential="-0.6826300"/>
<me:PotentialPoint angle="10" potential="-1.1814750"/>
<me:PotentialPoint angle="15" potential="-1.5227900"/>
<me:PotentialPoint angle="20" potential="-1.6803200"/>
<me:PotentialPoint angle="25" potential="-1.6278100"/>
<me:PotentialPoint angle="30" potential="-1.4177700"/>
<me:PotentialPoint angle="35" potential="-0.9976900"/>
<me:PotentialPoint angle="40" potential="-0.4463350"/>
<me:PotentialPoint angle="45" potential=" 0.2888050"/>
<me:PotentialPoint angle="50" potential=" 1.1027100"/>
<me:PotentialPoint angle="55" potential=" 1.9953800"/>

```

<me:PotentialPoint angle="60" potential=" 2.9143050"/>  
<me:PotentialPoint angle="65" potential=" 3.7807200"/>  
<me:PotentialPoint angle="70" potential=" 4.4896050"/>  
<me:PotentialPoint angle="75" potential=" 5.0147050"/>  
<me:PotentialPoint angle="80" potential=" 5.2510000"/>  
<me:PotentialPoint angle="85" potential=" 5.1984900"/>  
<me:PotentialPoint angle="90" potential=" 4.8834300"/>  
<me:PotentialPoint angle="95" potential=" 4.3058200"/>  
<me:PotentialPoint angle="100" potential=" 3.5444250"/>  
<me:PotentialPoint angle="105" potential=" 2.6517550"/>  
<me:PotentialPoint angle="110" potential=" 1.7590850"/>  
<me:PotentialPoint angle="115" potential=" 0.8664150"/>  
<me:PotentialPoint angle="120" potential=" 0.0787650"/>  
<me:PotentialPoint angle="125" potential="-0.6038650"/>  
<me:PotentialPoint angle="130" potential="-1.1289650"/>  
<me:PotentialPoint angle="135" potential="-1.4965350"/>  
<me:PotentialPoint angle="140" potential="-1.6540650"/>  
<me:PotentialPoint angle="145" potential="-1.6540650"/>  
<me:PotentialPoint angle="150" potential="-1.4440250"/>  
<me:PotentialPoint angle="155" potential="-1.0239450"/>  
<me:PotentialPoint angle="160" potential="-0.4725900"/>  
<me:PotentialPoint angle="165" potential=" 0.2362950"/>  
<me:PotentialPoint angle="170" potential=" 1.0764550"/>  
<me:PotentialPoint angle="175" potential=" 1.9691250"/>  
<me:PotentialPoint angle="180" potential=" 2.8880500"/>  
<me:PotentialPoint angle="185" potential=" 3.7282100"/>  
<me:PotentialPoint angle="190" potential=" 4.4633500"/>  
<me:PotentialPoint angle="195" potential=" 4.9884500"/>  
<me:PotentialPoint angle="200" potential=" 5.2510000"/>  
<me:PotentialPoint angle="205" potential=" 5.2247450"/>  
<me:PotentialPoint angle="210" potential=" 4.9096850"/>

<me:PotentialPoint angle="215" potential=" 4.3320750"/>  
<me:PotentialPoint angle="220" potential=" 3.5706800"/>  
<me:PotentialPoint angle="225" potential=" 2.7042650"/>  
<me:PotentialPoint angle="230" potential=" 1.8115950"/>  
<me:PotentialPoint angle="235" potential=" 0.9189250"/>  
<me:PotentialPoint angle="240" potential=" 0.1312750"/>  
<me:PotentialPoint angle="245" potential="-0.5513550"/>  
<me:PotentialPoint angle="250" potential="-1.1027100"/>  
<me:PotentialPoint angle="255" potential="-1.4702800"/>  
<me:PotentialPoint angle="260" potential="-1.6540650"/>  
<me:PotentialPoint angle="265" potential="-1.6540650"/>  
<me:PotentialPoint angle="270" potential="-1.4702800"/>  
<me:PotentialPoint angle="275" potential="-1.1027100"/>  
<me:PotentialPoint angle="280" potential="-0.5513550"/>  
<me:PotentialPoint angle="285" potential=" 0.1312750"/>  
<me:PotentialPoint angle="290" potential=" 0.9451800"/>  
<me:PotentialPoint angle="295" potential=" 1.8641050"/>  
<me:PotentialPoint angle="300" potential=" 2.7830300"/>  
<me:PotentialPoint angle="305" potential=" 3.6757000"/>  
<me:PotentialPoint angle="310" potential=" 4.4108400"/>  
<me:PotentialPoint angle="315" potential=" 4.9621950"/>  
<me:PotentialPoint angle="320" potential=" 5.2510000"/>  
<me:PotentialPoint angle="325" potential=" 5.1984900"/>  
<me:PotentialPoint angle="330" potential=" 4.8834300"/>  
<me:PotentialPoint angle="335" potential=" 4.2795650"/>  
<me:PotentialPoint angle="340" potential=" 3.4919150"/>  
<me:PotentialPoint angle="345" potential=" 2.5992450"/>  
<me:PotentialPoint angle="350" potential=" 1.6803200"/>  
<me:PotentialPoint angle="355" potential=" 0.7876500"/>  
</me:HinderedRotorPotential>  
<me:periodicity>3</me:periodicity>



```

</me:ExtraDOSCMethod>

</molecule>

</moleculeList>

<reactionList>

<reaction id="R1" reversible="true">
  <reactantList>
    <reactant>
      <molecule ref="Me2COO" role="modelled" />
    </reactant>
  </reactantList>
  <productList>
    <product>
      <molecule ref="Methyl-VHP" role="modelled" />
    </product>
  </productList>
  <me:transitionState>
    <molecule ref="TS1" role="transitionState" />
  </me:transitionState>
    <me:tunneling name="Eckart" />
  <me:MCRCMethod name="RRKM" />
</reaction>

  <reaction id="R2">
    <reactantList>
      <reactant>
        <molecule ref="Methyl-VHP" role="modelled" />
      </reactant>

```

```

</reactantList>
<productList>
  <product>
    <molecule ref="Methyl-vinoxy" role="sink" />
  </product>
  <product>
    <molecule ref="OH" role="sink" />
  </product>
</productList>
<me:transitionState>
  <molecule ref="TS2" role="transitionState" />
</me:transitionState>
<me:MCRCMethod name="RRKM" />
</reaction>

</reactionList>

<me:conditions>

<me:bathGas>N2</me:bathGas>

<me:PTs>

<me:PTpair units="Torr" P="4.1" T="243" precision="qd" bathGas="N2" >
  <me:experimentalRate ref1="Me2COO" ref2="Me2COO" error="4">71</me:experimentalRate>
</me:PTpair>
<me:PTpair units="Torr" P="4.1" T="243" precision="qd" bathGas="N2" >
  <me:experimentalRate ref1="Me2COO" ref2="Me2COO" error="7">50</me:experimentalRate>
</me:PTpair>
<me:PTpair units="Torr" P="8.2" T="243" precision="qd" bathGas="N2" >
  <me:experimentalRate ref1="Me2COO" ref2="Me2COO" error="4">67</me:experimentalRate>

```

```

</me:PTpair>
<me:PTpair units="Torr" P="41.0" T="243" precision="qd" bathGas="N2" >
  <me:experimentalRate ref1="Me2COO" ref2="Me2COO" error="7">58</me:experimentalRate>
</me:PTpair>
<me:PTpair units="Torr" P="82.0" T="243" precision="qd" bathGas="N2" >
  <me:experimentalRate ref1="Me2COO" ref2="Me2COO" error="11">39</me:experimentalRate>
</me:PTpair>
<me:PTpair units="Torr" P="82.0" T="243" precision="qd" bathGas="N2" >
  <me:experimentalRate ref1="Me2COO" ref2="Me2COO" error="5">49</me:experimentalRate>
</me:PTpair>

  <me:PTpair units="Torr" P="4.26" T="253" precision="qd" bathGas="N2" >
    <me:experimentalRate ref1="Me2COO" ref2="Me2COO" error="2">84</me:experimentalRate>
  </me:PTpair>
<me:PTpair units="Torr" P="4.26" T="253" precision="qd" bathGas="N2" >
  <me:experimentalRate ref1="Me2COO" ref2="Me2COO" error="7">92</me:experimentalRate>
</me:PTpair>
<me:PTpair units="Torr" P="8.53" T="253" precision="qd" bathGas="N2" >
  <me:experimentalRate ref1="Me2COO" ref2="Me2COO" error="8">86</me:experimentalRate>
</me:PTpair>
<me:PTpair units="Torr" P="8.53" T="253" precision="qd" bathGas="N2" >
  <me:experimentalRate ref1="Me2COO" ref2="Me2COO" error="2">103</me:experimentalRate>
</me:PTpair>

  <me:PTpair units="Torr" P="42.6" T="253" precision="qd" bathGas="N2" >
    <me:experimentalRate ref1="Me2COO" ref2="Me2COO" error="1">105</me:experimentalRate>
  </me:PTpair>
<me:PTpair units="Torr" P="42.6" T="253" precision="qd" bathGas="N2" >
  <me:experimentalRate ref1="Me2COO" ref2="Me2COO" error="4">111</me:experimentalRate>
</me:PTpair>
<me:PTpair units="Torr" P="85.3" T="253" precision="qd" bathGas="N2" >
  <me:experimentalRate ref1="Me2COO" ref2="Me2COO" error="13">103</me:experimentalRate>

```

</me:PTpair>

<me:PTpair units="Torr" P="4.43" T="263" precision="qd" bathGas="N2" >

<me:experimentalRate ref1="Me2COO" ref2="Me2COO" error="2">132</me:experimentalRate>

</me:PTpair>

<me:PTpair units="Torr" P="4.43" T="263" precision="qd" bathGas="N2" >

<me:experimentalRate ref1="Me2COO" ref2="Me2COO" error="5">134</me:experimentalRate>

</me:PTpair>

<me:PTpair units="Torr" P="8.87" T="263" precision="qd" bathGas="N2" >

<me:experimentalRate ref1="Me2COO" ref2="Me2COO" error="9">151</me:experimentalRate>

</me:PTpair>

<me:PTpair units="Torr" P="8.87" T="263" precision="qd" bathGas="N2" >

<me:experimentalRate ref1="Me2COO" ref2="Me2COO" error="7">149</me:experimentalRate>

</me:PTpair>

<me:PTpair units="Torr" P="44.3" T="263" precision="qd" bathGas="N2" >

<me:experimentalRate ref1="Me2COO" ref2="Me2COO" error="6">146</me:experimentalRate>

</me:PTpair>

<me:PTpair units="Torr" P="44.3" T="263" precision="qd" bathGas="N2" >

<me:experimentalRate ref1="Me2COO" ref2="Me2COO" error="14">139</me:experimentalRate>

</me:PTpair>

<me:PTpair units="Torr" P="88.7" T="263" precision="qd" bathGas="N2" >

<me:experimentalRate ref1="Me2COO" ref2="Me2COO" error="10">144</me:experimentalRate>

</me:PTpair>

<me:PTpair units="Torr" P="88.7" T="263" precision="qd" bathGas="N2" >

<me:experimentalRate ref1="Me2COO" ref2="Me2COO" error="7">135</me:experimentalRate>

</me:PTpair>

<me:PTpair units="Torr" P="4.6" T="273" precision="qd" bathGas="N2" >

<me:experimentalRate ref1="Me2COO" ref2="Me2COO" error="6">206</me:experimentalRate>

</me:PTpair>

<me:PTpair units="Torr" P="4.6" T="273" precision="qd" bathGas="N2" >

```

    <me:experimentalRate ref1="Me2COO" ref2="Me2COO" error="6">211</me:experimentalRate>
</me:PTpair>
<me:PTpair units="Torr" P="9.21" T="273" precision="qd" bathGas="N2" >
    <me:experimentalRate ref1="Me2COO" ref2="Me2COO" error="23">244</me:experimentalRate>
</me:PTpair>
<me:PTpair units="Torr" P="46.0" T="273" precision="qd" bathGas="N2" >
    <me:experimentalRate ref1="Me2COO" ref2="Me2COO" error="12">252</me:experimentalRate>
</me:PTpair>
    <me:PTpair units="Torr" P="92.1" T="273" precision="qd" bathGas="N2" >
    <me:experimentalRate ref1="Me2COO" ref2="Me2COO" error="3">272</me:experimentalRate>
</me:PTpair>

    <me:PTpair units="Torr" P="4.78" T="283" precision="qd" bathGas="N2" >
    <me:experimentalRate ref1="Me2COO" ref2="Me2COO" error="33">306</me:experimentalRate>
</me:PTpair>
<me:PTpair units="Torr" P="4.78" T="283" precision="qd" bathGas="N2" >
    <me:experimentalRate ref1="Me2COO" ref2="Me2COO" error="23">308</me:experimentalRate>
</me:PTpair>
<me:PTpair units="Torr" P="9.55" T="283" precision="qd" bathGas="N2" >
    <me:experimentalRate ref1="Me2COO" ref2="Me2COO" error="20">301</me:experimentalRate>
</me:PTpair>
<me:PTpair units="Torr" P="47.8" T="283" precision="qd" bathGas="N2" >
    <me:experimentalRate ref1="Me2COO" ref2="Me2COO" error="10">439</me:experimentalRate>
</me:PTpair>
    <me:PTpair units="Torr" P="95.5" T="283" precision="qd" bathGas="N2" >
    <me:experimentalRate ref1="Me2COO" ref2="Me2COO" error="24">410</me:experimentalRate>
</me:PTpair>

    <me:PTpair units="Torr" P="5.0" T="296" precision="qd" bathGas="N2" >
    <me:experimentalRate ref1="Me2COO" ref2="Me2COO" error="18">575</me:experimentalRate>
</me:PTpair>

```

```
<me:PTpair units="Torr" P="10.0" T="296" precision="qd" bathGas="N2" >
  <me:experimentalRate ref1="Me2COO" ref2="Me2COO" error="21">609</me:experimentalRate>
</me:PTpair>
```

```
<me:PTpair units="Torr" P="10.0" T="296" precision="qd" bathGas="N2" >
  <me:experimentalRate ref1="Me2COO" ref2="Me2COO" error="24">640</me:experimentalRate>
</me:PTpair>
```

```
<me:PTpair units="Torr" P="50.0" T="296" precision="qd" bathGas="N2" >
  <me:experimentalRate ref1="Me2COO" ref2="Me2COO" error="19">878</me:experimentalRate>
</me:PTpair>
```

```
  <me:PTpair units="Torr" P="200.0" T="296" precision="qd" bathGas="N2" >
    <me:experimentalRate ref1="Me2COO" ref2="Me2COO" error="34">946</me:experimentalRate>
  </me:PTpair>
```

```
    <me:PTpair units="Torr" P="10.47" T="310" precision="qd" bathGas="N2" >
      <me:experimentalRate ref1="Me2COO" ref2="Me2COO" error="55">1126</me:experimentalRate>
    </me:PTpair>
```

```
      <me:PTpair units="Torr" P="52.3" T="310" precision="qd" bathGas="N2" >
        <me:experimentalRate ref1="Me2COO" ref2="Me2COO" error="121">1386</me:experimentalRate>
      </me:PTpair>
```

```
</me:PTs>
```

```
<me:InitialPopulation>
  <me:molecule ref="Me2COO" me:population="1.0" />
</me:InitialPopulation>
```

```
</me:conditions>
```

```
<me:modelParameters>
  <me:grainSize units="cm-1">100</me:grainSize>
```

```
<me:energyAboveTheTopHill>25.0</me:energyAboveTheTopHill>
</me:modelParameters>
```

```
<me:control>
  <me:printSpeciesProfile />
  <me:eigenvalues>3</me:eigenvalues>
  <me:calcMethod name="simpleCalc" />
  <!--<me:calcMethod xsi:type="me:marquardt">
    <me:MarquardtIterations>20</me:MarquardtIterations>
    <me:MarquardtTolerance>0.01</me:MarquardtTolerance>
    <me:MarquardtDerivDelta>1.e-03</me:MarquardtDerivDelta>
  </me:calcMethod-->
</me:control>
```

```
<metadataList xmlns:dc="http://purl.org/dc/elements/1.1/">
  <dc:title>Project name</dc:title>
  <dc:source>CH32COO-test.xml</dc:source>
  <dc:creator>Mesmer v5.2</dc:creator>
  <dc:date>20200118_112216</dc:date>
  <dc:contributor>praseal</dc:contributor>
</metadataList>
</me:mesmer>
```

## ChemKin PLOG format

! First column: pressure (atm), second column: pre-exponential factor ( $\text{cm}^3 \text{s}^{-1}$  or  $\text{s}^{-1}$ ), third column: exponent of T, fourth column: activation energy (cal/mol)

### He bath gas

Me2COO => Methyl-VHP 1.34139e+16 -4.21585 5004.3

|       |       |             |           |           |
|-------|-------|-------------|-----------|-----------|
| PLOG/ | 0.001 | 1.34139e+16 | -4.21585  | 5004.3/   |
| PLOG/ | 0.005 | 1.05703e+10 | -1.75141  | 4641.58/  |
| PLOG/ | 0.01  | 1.90908e+06 | -0.292097 | 4310.91/  |
| PLOG/ | 0.025 | 1.04144     | 2.09736   | 3644.08/  |
| PLOG/ | 0.05  | 1.47193e-06 | 4.28895   | 2931.11/  |
| PLOG/ | 0.1   | 2.37602e-13 | 6.80045   | 2026.37/  |
| PLOG/ | 0.25  | 1.98802e-23 | 10.4798   | 570.716/  |
| PLOG/ | 0.5   | 2.00894e-31 | 13.3666   | -666.32/  |
| PLOG/ | 0.75  | 4.78107e-36 | 15.0239   | -1413.22/ |
| PLOG/ | 1     | 3.13034e-39 | 16.1603   | -1940.75/ |
| PLOG/ | 2.5   | 2.42703e-48 | 19.3915   | -3507.35/ |
| PLOG/ | 5     | 1.06523e-53 | 21.2785   | -4466.05/ |
| PLOG/ | 7.5   | 4.07813e-56 | 22.1267   | -4907.15/ |
| PLOG/ | 10    | 1.61291e-57 | 22.6182   | -5165.57/ |
| PLOG/ | 50    | 1.02528e-61 | 24.085    | -5949.18/ |
| PLOG/ | 100   | 2.31685e-62 | 24.3103   | -6071.22/ |

Me2COO => Methyl-vinoxy + OH 9.39794e+12 -1.95556 7599.86

|       |       |             |           |          |
|-------|-------|-------------|-----------|----------|
| PLOG/ | 0.001 | 9.39794e+12 | -1.95556  | 7599.86/ |
| PLOG/ | 0.005 | 4.60003e+11 | -1.16505  | 8386.74/ |
| PLOG/ | 0.01  | 7.50547e+10 | -0.74563  | 8722.24/ |
| PLOG/ | 0.025 | 4.35219e+09 | -0.123527 | 9165.43/ |
| PLOG/ | 0.05  | 2.89594e+08 | 0.427507  | 9477.44/ |



|       |      |             |         |          |
|-------|------|-------------|---------|----------|
| PLOG/ | 0.1  | 7.73846e+06 | 1.10809 | 9722.15/ |
| PLOG/ | 0.25 | 5592.46     | 2.35208 | 9825.28/ |
| PLOG/ | 0.5  | 1.67385     | 3.66265 | 9640.68/ |
| PLOG/ | 0.75 | 0.00438269  | 4.59493 | 9404.8/  |
| PLOG/ | 1    | 3.87425e-05 | 5.32576 | 9179.34/ |
| PLOG/ | 2.5  | 1.45169e-12 | 7.91679 | 8193.1/  |
| PLOG/ | 5    | 2.155e-18   | 9.90753 | 7306.33/ |
| PLOG/ | 7.5  | 1.51113e-21 | 10.9693 | 6801.99/ |
| PLOG/ | 10   | 1.39726e-23 | 11.6469 | 6470.8/  |
| PLOG/ | 50   | 4.34206e-31 | 14.0474 | 5248.27/ |
| PLOG/ | 100  | 1.2357e-32  | 14.484  | 5018.74/ |

Methyl-VHP => Me2COO 4.92036e+18 -5.3312 19690

|       |       |             |          |          |
|-------|-------|-------------|----------|----------|
| PLOG/ | 0.001 | 4.92036e+18 | -5.3312  | 19690/   |
| PLOG/ | 0.005 | 3.87728e+12 | -2.86675 | 19327.3/ |
| PLOG/ | 0.01  | 7.00269e+08 | -1.40744 | 18996.6/ |
| PLOG/ | 0.025 | 382.011     | 0.982009 | 18329.8/ |
| PLOG/ | 0.05  | 0.000539919 | 3.1736   | 17616.8/ |
| PLOG/ | 0.1   | 8.71547e-11 | 5.6851   | 16712.1/ |
| PLOG/ | 0.25  | 7.29224e-21 | 9.36446  | 15256.4/ |
| PLOG/ | 0.5   | 7.36898e-29 | 12.2512  | 14019.4/ |
| PLOG/ | 0.75  | 1.75374e-33 | 13.9085  | 13272.5/ |
| PLOG/ | 1     | 1.14824e-36 | 15.045   | 12745/   |
| PLOG/ | 2.5   | 8.90257e-46 | 18.2762  | 11178.4/ |
| PLOG/ | 5     | 3.90735e-51 | 20.1631  | 10219.7/ |
| PLOG/ | 7.5   | 1.4959e-53  | 21.0114  | 9778.58/ |
| PLOG/ | 10    | 5.91631e-55 | 21.5029  | 9520.16/ |
| PLOG/ | 50    | 3.76083e-59 | 22.9697  | 8736.54/ |
| PLOG/ | 100   | 8.49845e-60 | 23.1949  | 8614.5/  |

Methyl-VHP => Methyl-vinoxy + OH 1.05191e+37 -8.99153 22441.2

|       |       |             |            |          |
|-------|-------|-------------|------------|----------|
| PLOG/ | 0.001 | 1.05191e+37 | -8.99153   | 22441.2/ |
| PLOG/ | 0.005 | 3.82531e+33 | -7.58615   | 22166.9/ |
| PLOG/ | 0.01  | 3.09998e+31 | -6.78335   | 21923.4/ |
| PLOG/ | 0.025 | 1.46631e+28 | -5.5453    | 21467.6/ |
| PLOG/ | 0.05  | 2.18467e+25 | -4.51572   | 21034.6/ |
| PLOG/ | 0.1   | 2.73361e+22 | -3.47297   | 20558.7/ |
| PLOG/ | 0.25  | 7.65883e+18 | -2.21104   | 19943/   |
| PLOG/ | 0.5   | 4.89222e+16 | -1.43763   | 19547.5/ |
| PLOG/ | 0.75  | 4.56654e+15 | -1.07609   | 19358.3/ |
| PLOG/ | 1     | 1.11036e+15 | -0.860912  | 19244.5/ |
| PLOG/ | 2.5   | 4.69299e+13 | -0.380578  | 18986.8/ |
| PLOG/ | 5     | 1.23675e+13 | -0.178572  | 18876.9/ |
| PLOG/ | 7.5   | 7.55493e+12 | -0.103985  | 18836.1/ |
| PLOG/ | 10    | 5.83872e+12 | -0.0650061 | 18814.8/ |
| PLOG/ | 50    | 3.03407e+12 | 0.0339598  | 18760.3/ |
| PLOG/ | 100   | 2.78426e+12 | 0.0469437  | 18753.1/ |

**N<sub>2</sub> bath gas**

Me2COO => Methyl-VHP 71.0087 0.90556 2607.8

|       |       |             |         |           |
|-------|-------|-------------|---------|-----------|
| PLOG/ | 0.001 | 71.0087     | 0.90556 | 2607.8/   |
| PLOG/ | 0.005 | 3.51122e-12 | 5.88097 | 902.083/  |
| PLOG/ | 0.01  | 9.02343e-20 | 8.67211 | -169.514/ |
| PLOG/ | 0.025 | 1.51446e-31 | 12.9596 | -1925.71/ |
| PLOG/ | 0.05  | 1.91056e-41 | 16.5354 | -3467.25/ |
| PLOG/ | 0.1   | 1.46349e-51 | 20.1696 | -5088.91/ |
| PLOG/ | 0.25  | 7.6112e-64  | 24.5615 | -7108.84/ |
| PLOG/ | 0.5   | 2.51598e-71 | 27.2264 | -8362.67/ |
| PLOG/ | 0.75  | 8.70225e-75 | 28.457  | -8948.53/ |
| PLOG/ | 1     | 7.89198e-77 | 29.1825 | -9295.96/ |
| PLOG/ | 2.5   | 2.56133e-81 | 30.7753 | -10064.1/ |

|       |     |             |         |           |
|-------|-----|-------------|---------|-----------|
| PLOG/ | 5   | 3.66278e-83 | 31.429  | -10381.6/ |
| PLOG/ | 7.5 | 7.80107e-84 | 31.667  | -10497.6/ |
| PLOG/ | 10  | 3.49647e-84 | 31.7904 | -10557.8/ |
| PLOG/ | 50  | 4.65508e-85 | 32.1005 | -10709.3/ |
| PLOG/ | 100 | 3.5824e-85  | 32.1408 | -10729/   |

Me2COO => Methyl-vinoxy + OH    186506    0.92452    6756.38

|       |       |             |         |          |
|-------|-------|-------------|---------|----------|
| PLOG/ | 0.001 | 186506      | 0.92452 | 6756.38/ |
| PLOG/ | 0.005 | 6.8268      | 2.80079 | 7023.32/ |
| PLOG/ | 0.01  | 0.0292793   | 3.76781 | 7092.91/ |
| PLOG/ | 0.025 | 2.85473e-06 | 5.34554 | 7042.41/ |
| PLOG/ | 0.05  | 2.82614e-10 | 6.86374 | 6821.29/ |
| PLOG/ | 0.1   | 2.62684e-15 | 8.71979 | 6383.97/ |
| PLOG/ | 0.25  | 2.05704e-23 | 11.6356 | 5457.2/  |
| PLOG/ | 0.5   | 4.4624e-30  | 13.9857 | 4574.26/ |
| PLOG/ | 0.75  | 7.37427e-34 | 15.3029 | 4042.42/ |
| PLOG/ | 1     | 2.21459e-36 | 16.1742 | 3678.81/ |
| PLOG/ | 2.5   | 4.98261e-43 | 18.4315 | 2699.66/ |
| PLOG/ | 5     | 1.85641e-46 | 19.5548 | 2194.97/ |
| PLOG/ | 7.5   | 6.8663e-48  | 20.0048 | 1989.84/ |
| PLOG/ | 10    | 1.07182e-48 | 20.2488 | 1877.93/ |
| PLOG/ | 50    | 3.25393e-51 | 20.8989 | 1577.4/  |
| PLOG/ | 100   | 9.17379e-52 | 20.9878 | 1536.07/ |

Methyl-VHP => Me2COO    4091.57    0.0667793    17130.6

|       |       |             |           |          |
|-------|-------|-------------|-----------|----------|
| PLOG/ | 0.001 | 4091.57     | 0.0667793 | 17130.6/ |
| PLOG/ | 0.005 | 2.02319e-10 | 5.04219   | 15424.9/ |
| PLOG/ | 0.01  | 5.19937e-18 | 7.83333   | 14353.3/ |
| PLOG/ | 0.025 | 8.72643e-30 | 12.1209   | 12597.1/ |
| PLOG/ | 0.05  | 1.10088e-39 | 15.6966   | 11055.5/ |
| PLOG/ | 0.1   | 8.43272e-50 | 19.3308   | 9433.85/ |

|       |      |             |         |          |
|-------|------|-------------|---------|----------|
| PLOG/ | 0.25 | 4.38563e-62 | 23.7227 | 7413.93/ |
| PLOG/ | 0.5  | 1.44973e-69 | 26.3876 | 6160.09/ |
| PLOG/ | 0.75 | 5.0143e-73  | 27.6182 | 5574.24/ |
| PLOG/ | 1    | 4.54742e-75 | 28.3438 | 5226.81/ |
| PLOG/ | 2.5  | 1.47586e-79 | 29.9365 | 4458.69/ |
| PLOG/ | 5    | 2.11052e-81 | 30.5903 | 4141.12/ |
| PLOG/ | 7.5  | 4.49504e-82 | 30.8282 | 4025.19/ |
| PLOG/ | 10   | 2.01469e-82 | 30.9516 | 3964.97/ |
| PLOG/ | 50   | 2.68229e-83 | 31.2617 | 3813.46/ |
| PLOG/ | 100  | 2.06421e-83 | 31.302  | 3793.76/ |

Methyl-VHP => Methyl-vinoy + OH 3.78237e+30 -6.64781 21324.3

|       |       |             |            |          |
|-------|-------|-------------|------------|----------|
| PLOG/ | 0.001 | 3.78237e+30 | -6.64781   | 21324.3/ |
| PLOG/ | 0.005 | 1.33321e+25 | -4.56699   | 20669.3/ |
| PLOG/ | 0.01  | 2.46373e+22 | -3.55655   | 20284.7/ |
| PLOG/ | 0.025 | 7.80268e+18 | -2.28032   | 19758.8/ |
| PLOG/ | 0.05  | 4.17526e+16 | -1.45961   | 19401.7/ |
| PLOG/ | 0.1   | 6.91613e+14 | -0.81968   | 19114.2/ |
| PLOG/ | 0.25  | 1.87336e+13 | -0.258826  | 18856.2/ |
| PLOG/ | 0.5   | 3.79078e+12 | -0.0111992 | 18740.3/ |
| PLOG/ | 0.75  | 2.06505e+12 | 0.0828245  | 18696.1/ |
| PLOG/ | 1     | 1.49629e+12 | 0.132666   | 18672.5/ |
| PLOG/ | 2.5   | 8.06889e+11 | 0.22815    | 18627.2/ |
| PLOG/ | 5     | 6.48483e+11 | 0.261923   | 18611.1/ |
| PLOG/ | 7.5   | 6.01937e+11 | 0.273431   | 18605.6/ |
| PLOG/ | 10    | 5.79744e+11 | 0.279235   | 18602.9/ |
| PLOG/ | 50    | 5.29275e+11 | 0.293304   | 18596.2/ |
| PLOG/ | 100   | 5.23234e+11 | 0.295077   | 18595.3/ |
